# Supplementary material for: SMYD3: a new regulator of adipocyte precursor proliferation at the early steps of differentiation
Source: Int J Obes (Lond). 2023 Dec 26;48(4):557–66. doi: 10.1038/s41366-023-01450-x (PMC10978492; doi:10.1038/s41366-023-01450-x)
Supplement: Supplementary file 2 — Supplementary Table 2 [file 41366_2023_1450_MOESM2_ESM.xlsx]

## Sheet: LIMMA Hi-INFL vs CTRL
	logFC	AveExpr	t	P.Value	adj.P.Val	B
Q9CQ02	4.75575	12.7086	13.7343	1.5257e-10	4.34715e-07	13.8741
Q9ES52	5.61931	13.6929	13.2686	2.59654e-10	4.34715e-07	13.4241
P40338	5.07366	13.988	13.2541	2.64053e-10	4.34715e-07	13.4098
Q9D8S4	5.84282	14.6816	13.1811	2.87415e-10	4.34715e-07	13.3375
Q8BGY9	5.81157	15.6587	11.8481	1.45486e-09	1.76038e-06	11.9301
P49446	5.71185	12.6487	9.80939	2.35429e-08	2.04081e-05	9.41758
Q9DBS2	4.81815	13.0503	9.80737	2.36126e-08	2.04081e-05	9.41486
Q8C255	4.76919	12.68	9.61352	3.14494e-08	2.15906e-05	9.15028
O89016	4.61352	13.1237	9.59939	3.21183e-08	2.15906e-05	9.13082
Q9D975	5.56109	14.1745	8.87086	9.80435e-08	5.93163e-05	8.0914
P24288	4.7572	12.7974	8.25726	2.63527e-07	0.00014494	7.15978
Q63739	3.27296	10.9651	8.16243	3.08318e-07	0.000151323	7.01104
Q99JF5	5.90502	12.6667	8.13045	3.25158e-07	0.000151323	6.9606
Q922S4	1.72098	16.5933	7.98364	4.15791e-07	0.000179681	6.72709
Q9JLM8	2.08405	16.1438	7.87146	5.02667e-07	0.000191406	6.54654
Q9D2R0	-1.75485	19.8484	-7.81011	5.58017e-07	0.000191406	6.44702
Q8K4X7	5.14797	12.1007	7.80717	5.60819e-07	0.000191406	6.44224
P49718	5.02748	13.8644	7.79821	5.69474e-07	0.000191406	6.42765
Q76N33	4.34987	13.003	7.6879	6.88094e-07	0.000219104	6.24714
Q07646	2.16129	17.6572	7.5983	8.03361e-07	0.000243017	6.09918
Q9EPK5	3.75496	14.2863	7.4425	1.05431e-06	0.000303741	5.83906
Q5SWU9	-1.67042	20.4047	-7.13697	1.81376e-06	0.000498785	5.3184
Q91WK0	3.79131	12.9575	6.96122	2.49225e-06	0.000655569	5.01256
P59764	5.40455	11.5232	6.85451	3.02882e-06	0.000763516	4.8246
Q60780	5.62873	12.0232	6.70718	3.97474e-06	0.000938616	4.56226
Q91V92	-1.78358	20.6153	-6.69924	4.03372e-06	0.000938616	4.54803
Q8CJ12	-5.73653	12.1349	-6.60078	4.84557e-06	0.00105313	4.3708
P70429	5.74359	13.8528	6.59766	4.87399e-06	0.00105313	4.36514
P43883	7.8329	16.3788	6.54591	5.37005e-06	0.0011203	4.2714
P50172	-2.40963	18.1565	-6.40317	7.02955e-06	0.00140456	4.01071
P24472	-2.54615	17.1612	-6.39077	7.1969e-06	0.00140456	3.98791
A1L314	5.19626	14.6384	6.34562	7.84186e-06	0.0014826	3.90475
Q6QLQ4	4.70851	13.176	6.3234	8.18098e-06	0.00149985	3.86372
Q64521	-1.36716	18.1772	-6.29408	8.65204e-06	0.00153955	3.80945
Q9D7G0	2.27185	19.1386	6.05757	1.36474e-05	0.0021744	3.36716
Q9ET54	1.62154	16.8181	6.05526	1.37089e-05	0.0021744	3.36279
O35601	4.57853	12.4581	6.05407	1.37406e-05	0.0021744	3.36055
Q8JZK9	1.78484	18.5285	6.03262	1.43259e-05	0.0021744	3.32003
A6H5Z3	6.52782	13.2183	6.01818	1.47344e-05	0.0021744	3.29272
Q91WU0	-1.82699	18.2512	-5.99508	1.54132e-05	0.0021744	3.24896
Q80XC2	4.19598	11.7527	5.9883	1.56184e-05	0.0021744	3.23611
Q9JKY0	3.36003	12.0106	5.97873	1.59132e-05	0.0021744	3.21794
Q8VCT4	-1.76764	22.5561	-5.9754	1.60172e-05	0.0021744	3.21161
P62340	3.91812	11.3923	5.97254	1.6107e-05	0.0021744	3.20618
P56485	2.64345	10.4918	5.97044	1.61732e-05	0.0021744	3.20219
Q9WU81	7.09191	13.1219	5.95024	1.6825e-05	0.00221285	3.16379
Q9R0B9	4.90103	12.6881	5.87373	1.95503e-05	0.0024385	3.01785
P15306	-2.58522	16.4485	-5.86901	1.97328e-05	0.0024385	3.00881
Q99N69	7.53955	13.1497	5.86857	1.97498e-05	0.0024385	3.00797
Q6TCG2	2.24751	16.8755	5.81907	2.17741e-05	0.00263467	2.91307
Q61805	1.92263	17.0123	5.8032	2.24678e-05	0.00266529	2.88257
Q7TSI1	4.17786	12.4204	5.7541	2.47614e-05	0.00288089	2.788
P83093	4.49	12.1607	5.74168	2.53789e-05	0.0028942	2.76403
P23927	4.42733	15.2264	5.73276	2.58325e-05	0.0028942	2.74679
Q8CCK0	-5.72523	11.5345	-5.70349	2.73801e-05	0.00295899	2.69017
Q01965	4.28748	12.2352	5.70332	2.7389e-05	0.00295899	2.68985
O35405	2.66617	17.253	5.64504	3.07629e-05	0.00326519	2.57678
Q64449	3.40037	16.6605	5.62734	3.18705e-05	0.00332442	2.54235
Q8BQ30	5.27671	13.7231	5.61363	3.27568e-05	0.00335896	2.51564
P19324	1.43951	22.3143	5.59375	3.40872e-05	0.00343713	2.47688
P70248	4.79597	13.9516	5.56016	3.64624e-05	0.00361635	2.41128
Q60875	1.78933	15.8071	5.49456	4.16072e-05	0.00406006	2.28273
Q9QZL0	2.68162	14.4287	5.47483	4.32965e-05	0.00415784	2.24396
O88508	4.71098	11.6197	5.45917	4.46873e-05	0.00422435	2.21316
Q60872	5.85433	14.0376	5.44357	4.61192e-05	0.00429264	2.18244
Q9Z2D3	1.4633	16.2536	5.4158	4.87851e-05	0.00439508	2.12769
P11247	4.38038	11.6623	5.4112	4.92425e-05	0.00439508	2.1186
Q80UG5	1.54758	18.7992	5.40963	4.93992e-05	0.00439508	2.1155
Q91YE8	3.03446	15.7099	5.38945	5.14622e-05	0.00447935	2.07564
Q8BH86	1.39839	17.1172	5.38597	5.18272e-05	0.00447935	2.06875
Q9EP71	3.65043	13.3179	5.36966	5.35719e-05	0.0045072	2.03649
Q5M8N4	-1.56994	16.8318	-5.36904	5.36395e-05	0.0045072	2.03526
P14901	4.69499	15.1457	5.36043	5.45868e-05	0.00452397	2.01821
P28650	3.96201	13.8484	5.32831	5.8272e-05	0.00476413	1.95454
Q8BJ56	-1.1422	19.2154	-5.30397	6.12353e-05	0.00493965	1.90621
Q8R087	1.43629	14.8587	5.27579	6.48607e-05	0.00516326	1.85015
P11835	2.55882	17.6073	5.25278	6.79836e-05	0.00534156	1.80432
Q9QUT0	3.66857	14.549	5.22117	7.2529e-05	0.00549783	1.74124
Q8BW75	-1.23125	17.4625	-5.22037	7.26471e-05	0.00549783	1.73966
Q8K1I7	4.91311	14.3845	5.21817	7.29756e-05	0.00549783	1.73526
Q61268	4.16047	14.7737	5.21397	7.36074e-05	0.00549783	1.72686
P55065	1.5793	17.9155	5.20447	7.50547e-05	0.00551941	1.70788
Q62264	-1.98203	17.9561	-5.19771	7.6103e-05	0.00551941	1.69436
Q60860	1.77544	17.7706	5.19432	7.66332e-05	0.00551941	1.68759
Q9R1Q6	3.35979	12.1514	5.18085	7.87828e-05	0.00560748	1.66063
P41160	4.898	13.9809	5.16133	8.20071e-05	0.0057691	1.62153
Q9ES70	5.02406	12.2538	5.14071	8.5559e-05	0.00589754	1.5802
Q8VBX6	1.11969	16.224	5.13565	8.64563e-05	0.00589754	1.57003
Q99M71	3.15805	13.6566	5.13396	8.67572e-05	0.00589754	1.56665
Q5EBG6	4.05358	15.3158	5.11578	9.00666e-05	0.00605448	1.53016
Q05421	-2.66508	20.2363	-5.10769	9.1583e-05	0.00608876	1.51388
Q9QYR6	1.42625	16.4116	5.09949	9.31446e-05	0.00612527	1.4974
Q62426	1.75502	20.0567	5.08096	9.67748e-05	0.00623308	1.46013
P70387	1.84497	17.288	5.08061	9.68446e-05	0.00623308	1.45943
Q61216	3.36777	13.5332	5.06456	0.000100109	0.00637538	1.42711
Q9CYV5	1.45968	17.269	5.054	0.000102321	0.00644834	1.40582
P97797	5.436	13.6449	5.04744	0.000103717	0.00646893	1.39261
Q99JR1	-1.21233	18.4687	-5.04137	0.000105028	0.00648385	1.38036
Q09014	5.03015	12.6858	5.03179	0.000107133	0.00653258	1.36102
Q8CIG9	3.53006	13.1954	5.028	0.000107976	0.00653258	1.35337
P40936	-2.391	17.0438	-4.99894	0.000114677	0.00681124	1.29469
P16110	2.8485	19.481	4.99828	0.000114834	0.00681124	1.29335
Q3V1T4	1.29992	16.9628	4.98046	0.000119161	0.0069388	1.2573
Q8BHL5	1.35439	16.6311	4.97998	0.000119278	0.0069388	1.25634
Q8K1T1	4.15398	13.2127	4.97238	0.000121177	0.00698209	1.24095
Q9Z1G4	1.14933	18.2118	4.96704	0.000122529	0.00699338	1.23014
Q4JIM5	3.64852	10.5284	4.94455	0.000128391	0.00725951	1.18458
Q9CQI3	1.24292	17.8236	4.9321	0.000131759	0.00738096	1.15934
Q8BLN5	1.91556	17.0977	4.91696	0.00013598	0.00749478	1.12861
P97484	4.9058	12.82	4.91594	0.000136269	0.00749478	1.12655
Q6A0A2	3.48813	13.7019	4.89417	0.000142594	0.00777202	1.08233
P16879	4.14251	13.4344	4.88941	0.000144015	0.00777936	1.07266
Q9D6J1	1.57911	16.4539	4.86724	0.000150835	0.00804043	1.02757
Q6NSU3	4.16676	14.0896	4.8634	0.000152046	0.00804043	1.01977
Q7TMW6	3.07983	13.5451	4.86093	0.000152835	0.00804043	1.01473
Q9QZM0	1.11904	17.718	4.84874	0.000156777	0.0080502	0.989916
Q91ZU6	0.917235	16.4094	4.84483	0.000158063	0.0080502	0.981952
Q9JM90	5.4115	11.3379	4.84444	0.000158192	0.0080502	0.981157
O35177	3.18645	13.276	4.84398	0.000158343	0.0080502	0.980229
Q9CQW2	1.15591	17.7777	4.83261	0.000162151	0.0081751	0.957071
P30115	-1.93453	19.9188	-4.81881	0.000166901	0.00828226	0.928935
Q9R0E2	1.20685	16.2523	4.81849	0.000167014	0.00828226	0.928273
P22777	5.52263	13.0789	4.81197	0.000169309	0.00832779	0.914977
O88495	4.50727	12.9093	4.80169	0.000172991	0.00840198	0.894013
Q6VNB8	3.47283	12.9872	4.80003	0.000173595	0.00840198	0.890617
Q8VCB3	1.54801	16.3823	4.78021	0.000180954	0.00868864	0.850163
P52196	-1.77688	17.3663	-4.77332	0.000183587	0.00874567	0.836086
P29452	1.83704	15.3788	4.75705	0.000189961	0.00897864	0.80283
Q05020	4.05297	15.8938	4.7436	0.000195401	0.00910201	0.775321
O70551	4.70942	10.3378	4.74149	0.00019627	0.00910201	0.770998
Q9D1A0	3.43529	14.2028	4.73952	0.000197085	0.00910201	0.766964
P59016	6.09535	14.9125	4.73414	0.000199321	0.0091132	0.755972
Q91W59	3.39971	13.8497	4.73172	0.00020034	0.0091132	0.751005
P33610	4.13716	12.3375	4.72544	0.000203	0.00916529	0.738156
P50285	-1.21439	18.4981	-4.70761	0.000210755	0.00944495	0.701632
P70698	1.22932	15.9291	4.69316	0.000217257	0.0096592	0.672033
Q8BHC4	5.87443	15.249	4.68996	0.000218729	0.0096592	0.665457
Q3TGW2	-1.25393	16.7193	-4.68344	0.000221749	0.0097216	0.6521
Q8BLF1	4.86729	15.4053	4.66902	0.00022859	0.00993264	0.622506
Q61233	2.33634	21.5489	4.66568	0.000230202	0.00993264	0.615659
Q8BZA9	0.999947	16.1213	4.66304	0.000231488	0.00993264	0.610235
Q99P87	-2.11165	18.8639	-4.64994	0.000237966	0.00996792	0.583353
Q8CBA2	0.915202	16.3063	4.65319	0.000236344	0.00996792	0.590016
Q6ZQ88	-1.22218	17.7273	-4.64887	0.000238504	0.00996792	0.581154
Q6PHU5	-0.96792	17.8119	-4.64809	0.0002389	0.00996792	0.579537
Q7TQ62	-3.7063	13.8465	-4.64473	0.000240597	0.00996994	0.572646
Q8BWS5	3.4486	13.0798	4.63328	0.000246476	0.0100921	0.549134
Q9D964	4.72683	13.2599	4.63251	0.00024688	0.0100921	0.547538
O70458	1.58142	13.6204	4.62228	0.00025227	0.0101862	0.526507
Q9WUK4	3.6059	9.97025	4.62175	0.000252551	0.0101862	0.525424
Q91ZV4	-1.96429	15.522	-4.60523	0.000261516	0.010478	0.491457
P36423	2.78617	14.8791	4.60177	0.000263434	0.0104854	0.484342
Q05816	1.22763	22.3257	4.58554	0.000272629	0.0107119	0.450935
O08992	2.28952	15.0767	4.58547	0.000272666	0.0107119	0.450802
Q64471	-1.6409	17.6362	-4.52021	0.000313064	0.0122196	0.31631
Q9WUM4	1.24014	18.6564	4.51696	0.000315223	0.012225	0.309621
Q9CQI6	2.09981	20.1559	4.50377	0.000324164	0.0124917	0.282399
Q8CI94	-1.14832	20.3923	-4.49065	0.000333317	0.0127631	0.255301
Q3U2P1	1.11184	16.3496	4.48101	0.000340203	0.0129448	0.235401
Q8BUB4	3.92923	13.2344	4.46574	0.000351415	0.0132879	0.203853
Q9D379	1.35836	19.9917	4.45895	0.000356524	0.0132983	0.189809
Q8BR63	1.33261	16.5758	4.45891	0.00035655	0.0132983	0.189737
Q3TUH1	4.15697	13.8963	4.45663	0.000358285	0.0132983	0.185013
Q9R112	-0.9452	18.2655	-4.44292	0.000368872	0.0136078	0.156683
Q2TBE6	1.44072	16.5462	4.43765	0.000373027	0.0136775	0.145786
Q9QYE6	1.16874	14.2074	4.43482	0.000375282	0.0136775	0.139923
Q9Z0R6	3.37223	14.0475	4.42429	0.000383779	0.0137573	0.118144
Q9WUB3	-0.988338	20.3489	-4.42144	0.000386111	0.0137573	0.112253
Q8BJ64	-1.66833	18.0289	-4.42118	0.000386329	0.0137573	0.111704
Q8K245	4.00973	13.1545	4.42089	0.000386569	0.0137573	0.111098
P97369	2.1719	14.477	4.41471	0.000391683	0.0138458	0.0983161
Q9R0M4	-4.39312	13.9877	-4.41172	0.000394182	0.0138458	0.0921291
Q8BVE3	1.13789	18.0395	4.40965	0.00039592	0.0138458	0.0878507
P28741	5.42659	13.2602	4.40388	0.00040081	0.0139362	0.0759103
P17563	-0.871675	21.4127	-4.39627	0.000407363	0.0140781	0.0601384
Q8R550	1.7158	16.3133	4.39281	0.000410371	0.0140781	0.0529842
P56198	1.21883	15.8667	4.39051	0.000412391	0.0140781	0.0482088
Q9JHI5	-1.14421	20.4768	-4.38573	0.000416611	0.0140781	0.0383082
Q9D1K7	-1.12487	16.3539	-4.3855	0.000416812	0.0140781	0.0378391
P52293	3.55872	13.509	4.38133	0.000420526	0.0140781	0.0292129
Q9D6W8	3.14288	15.1115	4.37984	0.000421864	0.0140781	0.0261233
P54103	0.977838	15.0837	4.37744	0.000424032	0.0140781	0.0211397
O54998	0.990029	15.3771	4.37545	0.000425833	0.0140781	0.0170178
Q3U1Y4	5.16765	12.7939	4.3631	0.000437191	0.0142942	-0.00857525
Q8BHS6	4.2766	12.3894	4.36224	0.000437986	0.0142942	-0.0103424
Q9QX47	4.79076	13.733	4.36067	0.000439459	0.0142942	-0.0136072
Q5RL79	3.57077	13.2888	4.35789	0.000442072	0.0143023	-0.01937
Q9CY64	1.0697	19.8489	4.35444	0.000445329	0.0143311	-0.0265067
Q8BHZ0	1.25028	16.2157	4.34491	0.000454472	0.0145479	-0.0462658
Q8VD65	0.719436	16.5675	4.34199	0.000457309	0.0145617	-0.0523156
P03953	-1.72127	18.0872	-4.3377	0.00046152	0.0145874	-0.0612246
Q52KR3	4.28255	12.1135	4.33626	0.000462938	0.0145874	-0.0642077
P06800	1.7001	17.2117	4.32903	0.000470129	0.0146665	-0.0791914
Q69ZH9	3.07292	11.6598	4.32769	0.000471478	0.0146665	-0.0819765
Q61549	3.90453	11.3609	4.32433	0.00047487	0.0146665	-0.0889439
P54227	2.12864	15.4788	4.32382	0.000475389	0.0146665	-0.0900048
Q9CR25	3.78564	12.4689	4.32167	0.000477571	0.0146665	-0.0944572
Q9D8S3	1.84594	14.8054	4.314	0.000485464	0.0147773	-0.110388
P56564	-1.90909	15.0078	-4.31342	0.000486062	0.0147773	-0.111585
Q8BUM3	4.41726	11.9434	4.30707	0.000492692	0.0148744	-0.124753
Q8CCX5	3.21068	16.3508	4.30567	0.000494174	0.0148744	-0.12767
Q61881	4.09435	14.0417	4.30069	0.000499449	0.0148898	-0.137991
Q5SUA5	3.72964	14.5199	4.30055	0.000499607	0.0148898	-0.138297
P16254	3.2546	13.6	4.28462	0.000516892	0.0153294	-0.171348
P62814	1.48341	19.5925	4.28068	0.00052126	0.0153391	-0.179524
Q8BMA6	1.09501	16.2079	4.27811	0.000524134	0.0153391	-0.184866
Q3UNX5	-4.10815	10.6392	-4.27694	0.000525446	0.0153391	-0.187295
Q64455	3.80234	12.0217	4.27308	0.000529804	0.0153391	-0.19532
Q8R0A0	3.3889	13.1541	4.273	0.000529897	0.0153391	-0.19549
Q9R111	0.953505	20.9714	4.26457	0.000539527	0.0155044	-0.212988
Q9D0D5	3.62568	12.4215	4.2631	0.000541221	0.0155044	-0.216034
Q8R015	4.17215	13.4759	4.25995	0.00054488	0.0155044	-0.222578
Q62192	3.07251	15.1914	4.25902	0.00054597	0.0155044	-0.22452
Q6P9Q6	1.13587	16.1823	4.25692	0.000548421	0.0155044	-0.228871
Q8BPM2	3.76644	13.2619	4.25228	0.000553892	0.0155863	-0.238514
Q9DCD6	4.01786	13.5466	4.24052	0.000568005	0.0159094	-0.262953
Q60715	3.51332	15.003	4.2281	0.000583298	0.0162624	-0.288756
Q3ZK22	3.4019	12.165	4.21727	0.000596973	0.016499	-0.311261
P49962	4.48132	13.3775	4.21349	0.000601828	0.016499	-0.319126
Q8CIE4	3.3611	13.4075	4.21234	0.000603317	0.016499	-0.321525
O70423	-1.00269	23.018	-4.2111	0.000604912	0.016499	-0.32409
Q9Z2V4	-1.27282	19.0511	-4.20989	0.000606482	0.016499	-0.326605
Q99J47	1.11538	17.3841	4.20861	0.000608145	0.016499	-0.329265
P18242	1.66987	21.8774	4.20201	0.000616805	0.0166593	-0.342994
Q8R5A6	1.16422	15.4602	4.19465	0.000626603	0.0168147	-0.358295
Q8K1X4	4.5243	13.171	4.19353	0.000628118	0.0168147	-0.360639
Q8K2Q7	3.2542	14.1451	4.18972	0.000633262	0.0168777	-0.368557
Q504P2	4.75539	11.1948	4.18706	0.000636879	0.0168881	-0.374087
P10518	-1.07811	18.7505	-4.18533	0.000639236	0.0168881	-0.377673
Q8BG94	3.59519	12.8433	4.18159	0.000644391	0.0169075	-0.385469
Q9Z280	-3.57664	12.2625	-4.18074	0.000645558	0.0169075	-0.387226
Q8K297	1.39183	18.3988	4.17553	0.000652807	0.0170236	-0.398064
Q62356	2.77491	14.0425	4.17226	0.000657394	0.0170697	-0.404861
Q99NH8	4.79594	10.8956	4.15502	0.000682148	0.0173484	-0.440735
Q9D394	3.07563	14.3171	4.16142	0.000672848	0.0173484	-0.427413
P00493	1.01127	19.3967	4.15876	0.000676702	0.0173484	-0.432956
Q91XD7	1.08351	16.8234	4.15258	0.000685722	0.0173484	-0.445806
P45377	1.21692	16.8413	4.15202	0.000686557	0.0173484	-0.446987
P97872	-0.961832	17.609	-4.15147	0.00068736	0.0173484	-0.448121
P19096	-0.926745	22.9813	-4.1509	0.000688199	0.0173484	-0.449306
Q5SXY1	5.04619	14.1867	4.14462	0.000697529	0.0175106	-0.462373
Q61646	1.73964	20.8295	4.14236	0.000700925	0.0175231	-0.467085
Q61503	-4.77401	12.7807	-4.13717	0.000708763	0.0176462	-0.477875
Q61024	-0.874563	18.0023	-4.13211	0.000716503	0.0177658	-0.488413
P14142	-1.03552	17.8493	-4.12586	0.000726171	0.017932	-0.501416
Q9JI48	5.04515	12.5927	4.11151	0.00074888	0.0183968	-0.531288
Q8K352	4.18399	12.0085	4.11015	0.000751077	0.0183968	-0.534129
O70469	5.41498	13.6909	4.10172	0.000764785	0.0185957	-0.551672
P12265	1.76585	17.7641	4.10138	0.000765344	0.0185957	-0.55238
Q8BHG1	0.778414	17.6071	4.09944	0.000768548	0.0185989	-0.556431
P08905	1.72624	17.1804	4.08807	0.000787525	0.0189822	-0.580087
Q9QZK2	3.30589	14.9495	4.08448	0.000793623	0.0189952	-0.587566
Q9WUU7	1.57865	19.808	4.08282	0.000796457	0.0189952	-0.591022
Q99MS7	1.01983	16.2337	4.08222	0.000797485	0.0189952	-0.592274
P26262	1.68808	18.5609	4.07861	0.000803695	0.0190144	-0.599795
Q8K1B8	1.66043	17.7908	4.07752	0.000805571	0.0190144	-0.602055
Q91YX5	1.19973	19.564	4.07629	0.000807718	0.0190144	-0.604636
Q6SJQ0	6.23262	13.0669	4.07187	0.000815415	0.0191212	-0.613831
P07742	3.60708	13.6907	4.06247	0.000832045	0.0194358	-0.633404
Q99J36	3.65481	13.6996	4.05431	0.000846759	0.0196484	-0.650397
Q9Z1Z0	0.880164	19.4495	4.05383	0.000847643	0.0196484	-0.651409
Q3TC72	-0.989317	17.745	-4.05125	0.000852347	0.01966	-0.656772
P61028	1.26499	16.5121	4.05	0.00085464	0.01966	-0.659377
Q7TN29	1.36822	16.5545	4.03125	0.000889796	0.0203912	-0.698445
O70571	3.99046	14.3547	4.02719	0.000897586	0.0204213	-0.706893
Q9JJ59	3.73975	14.4053	4.0268	0.000898339	0.0204213	-0.707705
Q9D7X3	0.901223	19.0569	4.02531	0.000901236	0.0204213	-0.710825
Q5SSH7	3.13784	13.9556	4.0164	0.000918653	0.0207382	-0.729371
Q3UGS4	4.68427	11.6435	4.00724	0.00093693	0.0210722	-0.748457
Q8K385	0.997925	15.308	4.00343	0.000944637	0.0211669	-0.756393
P97820	1.15842	16.1974	3.99621	0.00095944	0.0212548	-0.771454
Q8C310	3.7094	11.88	3.99565	0.000960587	0.0212548	-0.772611
Q8VHR5	3.81224	13.4535	3.99494	0.000962058	0.0212548	-0.774094
Q6ZWY8	2.97419	16.1461	3.99374	0.000964541	0.0212548	-0.77659
P51569	5.33297	13.8578	3.99298	0.000966127	0.0212548	-0.778182
Q0GNC1	0.985963	15.4435	3.99097	0.000970308	0.0212694	-0.782364
Q8VIM9	1.031	17.2393	3.98836	0.000975763	0.0213118	-0.787793
P62482	3.5301	13.511	3.98085	0.000991665	0.0213863	-0.803449
Q9DB27	1.36698	15.4739	3.98079	0.000991794	0.0213863	-0.803575
Q9Z1T2	-5.68816	18.8339	-3.97787	0.000998038	0.0213863	-0.809653
Q923B6	-1.17279	20.2478	-3.97541	0.00100333	0.0213863	-0.814777
Q9EQ20	-1.07747	20.8656	-3.97516	0.00100389	0.0213863	-0.815312
Q9DBG1	-1.38926	16.4171	-3.97482	0.00100462	0.0213863	-0.816022
P63260	1.40886	20.9995	3.97321	0.0010081	0.0213863	-0.819368
O89017	1.71619	18.3806	3.97277	0.00100905	0.0213863	-0.820282
Q9JIF7	0.840152	17.7204	3.97102	0.00101287	0.0213863	-0.82394
P97328	-4.82436	12.9657	-3.97007	0.00101494	0.0213863	-0.825915
Q9EQQ2	0.90131	17.4175	3.96864	0.00101806	0.0213863	-0.828885
P06728	1.47815	21.4761	3.96019	0.00103674	0.021569	-0.84649
Q91XV3	1.86636	16.7978	3.95972	0.0010378	0.021569	-0.84748
O55131	0.823792	17.6936	3.95864	0.00104021	0.021569	-0.849725
Q91WE4	4.05779	12.3699	3.95721	0.00104343	0.021569	-0.852714
Q91YP2	1.10093	18.6271	3.95669	0.00104458	0.021569	-0.853785
Q9JM52	0.801739	16.655	3.95227	0.00105456	0.0217011	-0.862992
E9Q634	2.31963	14.9205	3.94997	0.00105981	0.0217351	-0.867797
Q9JK42	1.14721	15.9242	3.94436	0.00107268	0.0219247	-0.879481
P60710	1.26879	23.0107	3.93544	0.0010935	0.0222749	-0.898081
Q61490	1.32681	16.4766	3.93147	0.00110288	0.0223907	-0.906352
Q9JJE7	0.995882	18.4564	3.9283	0.00111042	0.0224469	-0.912941
Q9D1J1	1.28824	16.8429	3.92719	0.00111307	0.0224469	-0.915253
Q505D7	3.55603	14.4758	3.92442	0.00111974	0.0225064	-0.921034
Q8C147	2.26751	15.9766	3.92185	0.00112596	0.0225184	-0.92639
Q3UND0	5.12927	11.9024	3.9211	0.00112778	0.0225184	-0.927956
P62843	4.10779	15.3654	3.91379	0.00114566	0.0228001	-0.943173
Q8VDJ3	0.769922	18.95	3.90755	0.00116118	0.0230332	-0.956189
P10605	1.22871	19.2643	3.90492	0.00116777	0.0230882	-0.961663
P97468	-1.42457	16.0064	-3.90293	0.00117277	0.0231117	-0.965803
Q8K0D0	4.53698	13.3405	3.89545	0.00119184	0.0234112	-0.981406
P49710	1.82703	18.1028	3.89144	0.00120217	0.02347	-0.989749
Q8CHR6	-2.68001	14.5615	-3.89128	0.00120259	0.02347	-0.99009
P21956	1.63847	16.4941	3.88192	0.00122709	0.023871	-1.00959
Q99LL3	2.90032	13.5365	3.87864	0.0012358	0.0239634	-1.01643
Q9D8V0	1.08232	17.7295	3.87496	0.00124561	0.0240382	-1.02408
P05555	1.43896	17.1783	3.87422	0.0012476	0.0240382	-1.02562
Q8BGF6	3.62129	15.2497	3.86832	0.00126357	0.0242686	-1.03792
P30412	0.934803	18.3352	3.86664	0.00126816	0.0242797	-1.04143
P34960	4.56766	11.8377	3.86098	0.00128373	0.0245002	-1.05322
Q9Z1G3	1.49527	16.4789	3.85833	0.00129106	0.0245166	-1.05873
Q8K4B2	1.97293	12.9205	3.85775	0.0012927	0.0245166	-1.05995
Q8C1B7	1.20502	18.2925	3.84862	0.00131837	0.0249255	-1.07896
Q6GQT1	3.5743	15.8668	3.84529	0.00132788	0.0249523	-1.08591
Q9ERL7	4.42842	11.699	3.84523	0.00132804	0.0249523	-1.08602
P50516	1.36486	19.2467	3.83554	0.00135606	0.0253565	-1.1062
Q9DBH5	0.769083	20.349	3.8349	0.00135793	0.0253565	-1.10753
Q99J62	3.91195	13.3575	3.82878	0.00137598	0.0256144	-1.12029
Q5SNZ0	3.41217	9.1646	3.82079	0.00139987	0.0259792	-1.13692
O35929	3.61874	13.4459	3.81817	0.0014078	0.0260465	-1.14238
Q8R180	0.856257	17.1229	3.81287	0.00142397	0.0262653	-1.15341
Q8BPU7	2.50445	15.1032	3.80814	0.00143859	0.0264544	-1.16328
Q91YR9	1.05824	17.0084	3.806	0.00144523	0.026496	-1.16773
Q9EPB4	1.97441	14.8692	3.80405	0.00145134	0.0265275	-1.1718
P18760	1.21114	21.2093	3.78878	0.00149991	0.0272892	-1.20359
Q811J3	3.56031	12.1165	3.78812	0.00150203	0.0272892	-1.20495
Q9JKF1	1.3529	20.3014	3.77795	0.00153533	0.0277827	-1.22612
Q6WVG3	1.05873	18.9067	3.77703	0.00153838	0.0277827	-1.22804
Q99J77	1.1082	16.8322	3.77301	0.00155178	0.0279413	-1.23641
Q9R078	4.77552	11.2014	3.77148	0.00155691	0.0279505	-1.2396
Q9D8Y0	1.53456	16.5899	3.76812	0.00156823	0.0280208	-1.24659
P31996	1.87615	19.2313	3.76757	0.00157009	0.0280208	-1.24773
Q60960	3.41382	13.4004	3.76305	0.00158546	0.0282118	-1.25713
Q04207	1.04371	17.0089	3.75467	0.00161438	0.028473	-1.27458
Q99LU0	3.35933	16.4145	3.75442	0.00161527	0.028473	-1.27511
Q8R4G6	4.69657	11.7489	3.75396	0.00161687	0.028473	-1.27607
O35623	3.71171	12.8237	3.75238	0.00162239	0.028473	-1.27936
O89053	1.53006	19.6087	3.75172	0.00162469	0.028473	-1.28072
Q8CIN4	0.866005	18.2825	3.75067	0.00162837	0.028473	-1.28291
Q80YT7	3.7669	12.5139	3.74874	0.00163516	0.0285092	-1.28692
Q9CYD3	1.11321	16.744	3.73924	0.001669	0.0290157	-1.30669
Q78PY7	0.779273	18.795	3.73135	0.00169765	0.0293485	-1.32311
P97298	1.10303	17.2116	3.73053	0.00170064	0.0293485	-1.3248
Q9D6Y9	-0.646963	19.1661	-3.72894	0.00170649	0.0293485	-1.32811
Q9D486	3.4231	13.5237	3.72866	0.00170755	0.0293485	-1.32871
P35922	0.884747	16.564	3.72565	0.00171867	0.0293752	-1.33497
Q7TMR0	1.08936	16.9833	3.72561	0.00171882	0.0293752	-1.33506
P52624	3.7935	11.7245	3.72312	0.00172805	0.0294499	-1.34022
Q5SSL4	3.90537	10.9254	3.7203	0.0017386	0.0295463	-1.34609
O08705	-1.02277	18.6226	-3.71853	0.00174523	0.0295761	-1.34976
Q9D8Y7	4.14256	12.2502	3.70589	0.00179347	0.0303087	-1.37606
Q80ZE4	2.12585	12.8126	3.69913	0.00181981	0.0306681	-1.39011
Q62422	1.18961	18.247	3.69312	0.00184355	0.0308988	-1.4026
Q9CX60	3.74824	13.3421	3.69244	0.00184628	0.0308988	-1.40403
Q8BIW1	1.00832	16.9691	3.6918	0.00184882	0.0308988	-1.40536
Q9QZE5	0.828219	17.5246	3.68543	0.00187441	0.0312401	-1.4186
Q9CXZ1	-0.762603	17.3101	-3.68333	0.00188293	0.0312959	-1.42297
Q62167	0.808387	18.8515	3.67861	0.00190216	0.0315289	-1.43277
P07214	0.885894	19.906	3.67557	0.00191468	0.0316498	-1.43909
B5X0G2	-2.67138	8.49638	-3.67166	0.00193091	0.0318311	-1.44722
Q9QXZ0	1.20892	15.7447	3.66856	0.00194385	0.0319024	-1.45366
Q9R0E1	0.966199	17.0068	3.66719	0.0019496	0.0319024	-1.4565
Q80YR4	4.41598	11.9592	3.66685	0.00195106	0.0319024	-1.45722
Q9QYS9	1.51844	17.0172	3.65247	0.00201248	0.0327725	-1.48708
Q99LR1	1.17634	18.7894	3.65187	0.0020151	0.0327725	-1.48833
Q9WU79	-1.35968	16.293	-3.64806	0.00203173	0.0329543	-1.49625
Q91WC9	1.96946	16.5282	3.64011	0.00206685	0.0330806	-1.51275
P48428	4.58469	13.9671	3.64426	0.00204847	0.0330806	-1.50415
Q99P91	4.29439	13.9817	3.64305	0.0020538	0.0330806	-1.50665
Q61699	1.09255	16.996	3.64251	0.00205621	0.0330806	-1.50778
Q99JH8	3.36634	12.7674	3.64037	0.00206572	0.0330806	-1.51223
P47757	0.888523	20.1838	3.63542	0.00208788	0.0333289	-1.5225
Q8BMP6	1.85883	16.3025	3.63031	0.00211101	0.0335247	-1.53311
Q9QWY8	1.91693	15.8151	3.62964	0.00211405	0.0335247	-1.53449
Q8R0F3	2.89603	14.6956	3.62905	0.00211676	0.0335247	-1.53573
G5E829	-0.872318	18.7069	-3.61896	0.00216331	0.0340871	-1.55666
P19001	-1.50383	17.7475	-3.61837	0.00216606	0.0340871	-1.55788
P70677	1.09877	16.3314	3.61664	0.00217416	0.0340871	-1.56148
Q8R2V5	1.25969	16.0428	3.6165	0.00217482	0.0340871	-1.56177
O35657	3.53739	15.3144	3.61522	0.00218083	0.0340931	-1.56443
P62911	3.7045	14.4299	3.61192	0.00219643	0.0342484	-1.57128
Q9JHQ0	-3.41007	12.9657	-3.60444	0.00223213	0.0347156	-1.5868
P25962	-4.83969	14.8538	-3.60252	0.00224138	0.0347573	-1.59078
Q9D771	3.86674	13.025	3.60151	0.0022463	0.0347573	-1.59289
Q9D0F6	3.65755	11.7816	3.59183	0.00229365	0.0353995	-1.61296
Q80WQ2	0.821547	16.4836	3.59009	0.00230227	0.0354421	-1.61656
Q99JN2	3.31122	14.3117	3.58663	0.00231951	0.0354839	-1.62374
Q9QUR7	0.986894	17.5876	3.58657	0.00231982	0.0354839	-1.62387
Q3UZ39	2.72807	14.1441	3.58602	0.00232258	0.0354839	-1.62501
P29351	1.64525	17.1541	3.58065	0.00234962	0.0357613	-1.63614
P24638	1.09416	17.7102	3.57929	0.0023565	0.0357613	-1.63896
Q9JIK5	0.780273	16.294	3.57891	0.00235847	0.0357613	-1.63976
Q8R1F1	1.70314	17.8545	3.56765	0.00241641	0.0365482	-1.6631
Q8R3E3	0.921436	16.8594	3.5655	0.00242763	0.0366263	-1.66755
P97321	4.38091	11.0703	3.56132	0.00244963	0.0368663	-1.67622
Q3UGX3	-3.35558	11.6198	-3.55726	0.00247113	0.0370082	-1.68462
Q9JL62	0.849217	17.1145	3.55723	0.00247129	0.0370082	-1.68468
Q9R062	0.910538	18.817	3.55576	0.00247914	0.0370341	-1.68773
Q9JI10	2.99794	13.5594	3.55095	0.00250497	0.037274	-1.69769
Q9D281	2.29528	16.4964	3.549	0.00251551	0.037274	-1.70173
Q8R307	1.00925	16.9923	3.54847	0.00251843	0.037274	-1.70284
Q9DCR2	1.17361	16.7568	3.54821	0.00251985	0.037274	-1.70338
Q61553	0.801966	17.6824	3.54269	0.00254998	0.0376278	-1.71481
P10107	1.27848	21.9099	3.54128	0.00255774	0.0376505	-1.71773
Q80Z24	-2.94357	14.2181	-3.53839	0.00257374	0.0377939	-1.72372
Q9Z2G6	0.872817	14.5819	3.53539	0.00259041	0.0379467	-1.72992
Q8BM55	2.36292	14.1162	3.52848	0.00262927	0.0383299	-1.74423
Q8BY87	0.898152	15.6199	3.52833	0.00263012	0.0383299	-1.74454
Q8R086	-1.34625	16.9605	-3.52634	0.00264147	0.0383299	-1.74867
P40124	1.12138	19.5217	3.52626	0.00264191	0.0383299	-1.74883
Q9JHF7	4.65813	9.72512	3.52471	0.00265072	0.0383657	-1.75203
Q3TWL2	3.13315	14.2175	3.52224	0.00266486	0.0384783	-1.75714
Q05D44	1.10671	15.8542	3.51486	0.00270758	0.0390021	-1.77241
Q922Q8	0.859605	18.7863	3.51341	0.00271604	0.0390181	-1.77541
Q9DB60	0.992208	19.8694	3.51247	0.00272159	0.0390181	-1.77737
Q3V0T4	4.85467	10.3198	3.51096	0.00273044	0.0390394	-1.78049
Q62241	2.44687	14.7309	3.50914	0.00274116	0.0390394	-1.78425
Q9ESJ4	3.09413	11.6489	3.50893	0.00274244	0.0390394	-1.7847
Q9QYR9	-1.06073	15.8042	-3.50646	0.00275707	0.0391556	-1.78981
E9Q4Z2	-1.14841	16.1433	-3.50162	0.00278593	0.0394727	-1.7998
P50171	-0.721703	18.6076	-3.50033	0.0027937	0.0394905	-1.80248
Q9EQU5	1.09559	16.9633	3.49787	0.00280854	0.0396076	-1.80756
Q07113	1.10757	16.7699	3.48859	0.00286526	0.040175	-1.82675
Q62077	0.727081	15.867	3.48885	0.00286364	0.040175	-1.82621
Q8R0S2	1.09311	15.2328	3.48803	0.00286869	0.040175	-1.8279
Q8VCH6	2.37444	15.498	3.48676	0.0028766	0.0401927	-1.83054
Q9CVB6	1.18306	18.7493	3.48462	0.0028899	0.0402855	-1.83497
P23298	3.27136	12.7979	3.47958	0.00292141	0.0406311	-1.84537
Q8R3B1	-0.750411	18.387	-3.47025	0.00298071	0.0413607	-1.86465
Q8R323	3.07271	10.9694	3.46583	0.00300919	0.0416604	-1.87377
Q8C729	0.975541	15.6592	3.46455	0.00301754	0.0416806	-1.87643
Q9JJZ4	1.44849	15.5957	3.45529	0.00307832	0.0424233	-1.89555
B9EKI3	2.95485	12.4221	3.45411	0.00308612	0.0424342	-1.89798
O88736	0.917964	16.1058	3.45275	0.00309518	0.0424622	-1.90079
P20491	3.41385	13.6343	3.45045	0.00311052	0.0425566	-1.90553
Q64514	0.783259	17.4382	3.44962	0.00311612	0.0425566	-1.90726
P27870	4.90417	11.5453	3.44355	0.00315712	0.0430193	-1.91979
Q61263	4.66153	10.8793	3.43834	0.0031927	0.0433006	-1.93053
Q9ERE3	3.14374	11.0686	3.43796	0.00319531	0.0433006	-1.93131
Q9ET26	2.77091	14.0367	3.43739	0.00319924	0.0433006	-1.93249
P52875	4.1527	13.5047	3.43583	0.00320998	0.0433491	-1.9357
O89079	0.854412	16.781	3.4297	0.0032526	0.0438267	-1.94834
P00329	-0.874581	20.7065	-3.42498	0.00328581	0.0441758	-1.95807
P03976	2.85361	14.2871	3.4216	0.00330984	0.0442948	-1.96506
P50518	1.57688	17.0872	3.41973	0.00332314	0.0442948	-1.9689
P61924	2.50516	16.5719	3.41963	0.00332385	0.0442948	-1.9691
Q99K01	0.902104	17.4901	3.41962	0.00332394	0.0442948	-1.96913
Q6P4T0	3.53996	12.0576	3.41343	0.00336855	0.0447906	-1.9819
Q91YT0	-0.68334	19.5298	-3.41127	0.00338418	0.0448998	-1.98634
Q9CYG7	1.13041	15.3376	3.40941	0.0033978	0.0449819	-1.99018
Q91ZR2	0.873779	16.9658	3.40667	0.00341784	0.0451226	-1.99581
Q8K330	4.07597	10.6828	3.40593	0.00342335	0.0451226	-1.99735
D3Z7P3	0.983939	16.7929	3.40037	0.00346447	0.0455653	-2.00879
Q61462	1.91703	15.0833	3.39309	0.00351916	0.0461843	-2.02379
Q8VDS8	0.62285	14.9839	3.39206	0.00352697	0.0461866	-2.02591
Q99PT1	0.759394	21.1676	3.39047	0.00353908	0.046235	-2.02919
Q9DBB8	-0.687968	19.5368	-3.38956	0.00354596	0.046235	-2.03105
Q9DBZ1	1.61227	15.241	3.3877	0.0035602	0.0463209	-2.03488
Q8VHE0	0.86405	16.3451	3.38561	0.00357622	0.0464213	-2.03918
Q9CQY1	3.66178	13.3414	3.3847	0.00358326	0.0464213	-2.04106
Q78PG9	3.4108	15.0708	3.38343	0.00359308	0.0464491	-2.04368
Q9QZR0	3.41505	11.9913	3.37659	0.00364625	0.0470358	-2.05774
Q8BVW3	3.06501	15.1493	3.37146	0.00368671	0.0472169	-2.0683
O09131	0.972762	20.6284	3.37106	0.00368986	0.0472169	-2.06912
Q8VEB4	0.955054	16.8199	3.37086	0.00369147	0.0472169	-2.06954
Q80UY1	3.61288	14.1399	3.37017	0.00369697	0.0472169	-2.07096
Q06770	0.902806	16.5791	3.36987	0.00369931	0.0472169	-2.07156
Q5SWT3	-0.784124	16.9531	-3.36572	0.00373249	0.0472418	-2.08011
Q61586	0.899901	17.5263	3.36799	0.0037143	0.0472418	-2.07543
P35951	3.40001	12.5325	3.36701	0.00372219	0.0472418	-2.07746
Q2TPA8	0.766979	18.6667	3.36639	0.00372709	0.0472418	-2.07872
Q62393	2.01331	16.2667	3.3636	0.00374955	0.0472539	-2.08447
O88845	3.05043	13.3683	3.36334	0.00375161	0.0472539	-2.08499
O70145	1.71951	17.1493	3.36239	0.00375928	0.0472539	-2.08695
Q6PHN7	3.25015	11.4732	3.36164	0.00376535	0.0472539	-2.08849
Q62468	-4.10698	10.7689	-3.36062	0.0037736	0.0472539	-2.09058
Q9Z0P4	-0.970422	16.9689	-3.35804	0.00379459	0.0472539	-2.09589
Q9WVA2	1.09863	16.8906	3.35794	0.0037954	0.0472539	-2.09609
Q8BHD7	1.08916	16.4926	3.35788	0.00379594	0.0472539	-2.09623
Q8JZR0	0.897928	23.023	3.35482	0.00382093	0.0474674	-2.10251
O88876	1.63489	15.8933	3.35351	0.00383174	0.0475042	-2.10521
Q9WV60	0.869784	17.1588	3.34763	0.00388043	0.047989	-2.11728
Q9CQC6	0.824431	17.832	3.34688	0.00388671	0.047989	-2.11883
Q9ET01	-0.883039	17.6426	-3.34345	0.00391549	0.0481664	-2.12588
Q3UMB9	1.40305	15.0388	3.34327	0.003917	0.0481664	-2.12625
O70370	2.7079	16.0951	3.34149	0.00393201	0.0482218	-2.12991
O70172	1.57941	14.0888	3.34084	0.00393745	0.0482218	-2.13123
P25085	4.87152	12.0088	3.3385	0.00395733	0.0483277	-2.13604
Q91W86	0.784789	17.2223	3.33779	0.00396336	0.0483277	-2.1375
Q9DCH4	0.802198	17.3505	3.337	0.00397006	0.0483277	-2.13911
Q9DBP5	0.918929	19.9363	3.33418	0.00399423	0.0484789	-2.14491
Q99LJ6	1.02947	17.9495	3.33368	0.0039985	0.0484789	-2.14594
Q9JJ28	1.0865	16.2833	3.33214	0.00401176	0.0484939	-2.1491
P15379	1.29491	17.9008	3.33167	0.00401577	0.0484939	-2.15005
P47738	-0.770267	22.9109	-3.32979	0.00403206	0.0485935	-2.15392
Q8K3K8	1.51651	14.3971	3.32726	0.00405403	0.0487612	-2.15911
Q5SSH8	-2.56679	14.5573	-3.32552	0.00406917	0.0488462	-2.16268
Q8R2R9	3.95055	14.0034	3.31711	0.00414339	0.0496285	-2.17995
Q9D0F3	0.999836	18.3377	3.31595	0.00415371	0.0496285	-2.18232
P46062	0.822076	15.8937	3.31536	0.00415895	0.0496285	-2.18353
Q0VGB7	2.66016	14.2329	3.31442	0.00416735	0.0496308	-2.18546
P35831	0.826912	15.6091	3.31158	0.00419286	0.0498366	-2.19128
P69566	0.748939	14.9117	3.30922	0.00421412	0.0499911	-2.19612
Q9ERD7	0.961281	17.2742	3.30613	0.00424222	0.0502097	-2.20246
P56873	2.52513	15.9424	3.30498	0.00425264	0.0502097	-2.2048
A2AAY5	1.0847	16.0362	3.30446	0.00425745	0.0502097	-2.20588
Q7TMM9	2.19644	17.6852	3.3035	0.0042662	0.050215	-2.20785
Q8C6E0	2.51495	12.7975	3.30178	0.00428195	0.0502382	-2.21137
Q8VCB1	0.88237	15.2464	3.30147	0.00428478	0.0502382	-2.212
O55229	0.85207	15.8119	3.2968	0.00432797	0.0506465	-2.22157
Q9QYI4	3.15216	13.497	3.2936	0.00435785	0.0508874	-2.22814
Q8K4I3	0.968085	17.3729	3.29279	0.00436538	0.0508874	-2.22979
O35704	4.16668	12.1761	3.29187	0.00437403	0.0508901	-2.23168
P17751	0.79252	21.7585	3.28191	0.00446849	0.0518894	-2.25207
P10922	-0.892561	18.4627	-3.27979	0.00448888	0.0519484	-2.25642
Q9EPQ7	0.790223	15.2329	3.27959	0.00449074	0.0519484	-2.25681
P09671	0.929312	20.7448	3.27829	0.00450335	0.0519948	-2.25949
P57080	1.85301	13.9518	3.27544	0.00453088	0.0521538	-2.2653
Q99104	2.74196	14.3231	3.27509	0.00453436	0.0521538	-2.26603
Q8VDU5	2.62995	10.5579	3.27212	0.00456329	0.0522897	-2.2721
Q63810	2.87339	12.5602	3.27127	0.00457165	0.0522897	-2.27385
Q03311	-0.950231	17.0624	-3.27122	0.00457211	0.0522897	-2.27394
Q8CIE6	0.76608	19.7616	3.2647	0.00463648	0.052878	-2.28728
Q9EQJ0	4.00825	11.1346	3.26424	0.00464103	0.052878	-2.28822
Q7TQH0	0.808604	17.3644	3.26037	0.00467972	0.0531207	-2.29613
P62908	0.708278	20.7599	3.26035	0.00467989	0.0531207	-2.29617
Q9CR24	-3.0901	13.0433	-3.25924	0.00469102	0.0531474	-2.29844
Q99K28	1.03389	16.3268	3.25705	0.00471312	0.0532143	-2.30292
Q9CQJ4	3.1422	12.1368	3.25691	0.00471453	0.0532143	-2.3032
Q0VGY8	2.75062	12.2098	3.25463	0.0047376	0.0533751	-2.30786
Q8K1A5	2.83949	12.8491	3.25185	0.00476593	0.0535946	-2.31354
Q8K2Q9	1.85188	15.0092	3.24968	0.00478817	0.0537447	-2.31798
P41216	0.89214	21.4807	3.2469	0.00481681	0.0539661	-2.32366
P70315	2.47022	14.6487	3.24313	0.00485588	0.0543033	-2.33137
Q6VVW5	-3.3531	12.5932	-3.24221	0.00486544	0.0543099	-2.33324
Q6PIU9	0.677811	15.809	3.23933	0.00489557	0.0544021	-2.33913
P56477	3.42325	11.5265	3.23927	0.00489619	0.0544021	-2.33925
Q60631	0.768561	17.4284	3.23841	0.00490515	0.0544021	-2.34099
Q8BH24	0.828589	18.0229	3.23798	0.00490967	0.0544021	-2.34187
Q9DBW0	0.870651	16.3596	3.23569	0.00493385	0.0545179	-2.34655
P49615	0.797856	15.7581	3.23521	0.00493898	0.0545179	-2.34754
P70268	0.902895	17.1583	3.23443	0.00494716	0.0545179	-2.34912
Q8BXB6	3.40609	9.82889	3.23205	0.00497252	0.0545219	-2.35399
Q9ERA6	3.12428	11.3665	3.23188	0.00497425	0.0545219	-2.35432
Q9Z0G0	2.64885	13.0363	3.23185	0.00497456	0.0545219	-2.35438
P61961	0.832111	17.7	3.23051	0.00498893	0.0545805	-2.35713
Q61398	1.15473	15.6349	3.2293	0.00500188	0.0546066	-2.3596
O88342	1.02871	21.0952	3.2286	0.00500936	0.0546066	-2.36102
Q9JLJ5	4.57131	11.5927	3.22671	0.00502972	0.0546766	-2.36488
P27546	0.837451	19.5767	3.22632	0.00503386	0.0546766	-2.36567
O88738	0.703509	16.9028	3.22466	0.00505185	0.0547736	-2.36907
Q99JY9	1.35518	19.8533	3.21906	0.00511275	0.0553348	-2.38048
P47753	0.782956	16.6406	3.2151	0.00515621	0.0557055	-2.38854
Q91VD1	-0.733465	17.9903	-3.21398	0.00516862	0.0557401	-2.39083
O35855	-0.721358	20.6374	-3.20978	0.00521533	0.0560575	-2.3994
Q8R5A3	2.38155	15.3128	3.20914	0.00522247	0.0560575	-2.4007
Q8R0P4	-0.742986	16.5869	-3.20884	0.00522586	0.0560575	-2.40132
Q9EQK5	0.913538	19.8117	3.2072	0.00524416	0.0561543	-2.40465
P16015	-0.958534	25.6551	-3.19843	0.00534349	0.0571168	-2.42251
Q9D6I7	3.19414	11.6543	3.19741	0.00535518	0.0571409	-2.42459
O55029	0.706313	20.2012	3.19465	0.00538692	0.0573469	-2.43022
Q9CZE3	0.81692	17.0353	3.19395	0.00539493	0.0573469	-2.43163
Q8N9S3	4.25034	14.2181	3.19307	0.00540514	0.0573469	-2.43343
Q9QYB1	0.781144	19.7909	3.19216	0.00541566	0.0573469	-2.43528
Q9Z0K8	-0.92593	14.9865	-3.19162	0.00542189	0.0573469	-2.43637
O89103	0.918885	17.5526	3.19079	0.00543153	0.0573486	-2.43806
Q8K0Q5	0.767455	17.1447	3.18942	0.00544747	0.0573586	-2.44085
Q8BH73	2.85015	14.7119	3.18908	0.00545144	0.0573586	-2.44154
Q9R060	2.42979	14.9755	3.18514	0.00549755	0.0576768	-2.44956
Q8K4L0	4.48399	12.2908	3.18487	0.00550074	0.0576768	-2.45011
Q6PGH2	2.20169	16.5541	3.18131	0.00554281	0.0580173	-2.45736
Q9CQX8	3.27562	14.7097	3.17982	0.0055605	0.0581019	-2.46039
P97742	1.05546	17.3913	3.17495	0.00561873	0.0585854	-2.4703
P42225	0.881666	18.2525	3.17433	0.00562613	0.0585854	-2.47155
P97467	2.6445	15.0525	3.16948	0.00568479	0.0590944	-2.48141
Q921Y4	2.45711	13.8106	3.16423	0.00574887	0.0596581	-2.49207
P0C6B7	3.67977	9.78049	3.15993	0.00580191	0.0600622	-2.5008
Q8CCH2	2.22429	14.431	3.15879	0.0058161	0.0600622	-2.50313
Q3UPL0	0.659768	19.3911	3.15867	0.00581759	0.0600622	-2.50337
E9Q3C1	3.23605	14.2252	3.15632	0.00584683	0.060186	-2.50813
Q9Z110	1.26663	15.9591	3.15611	0.00584949	0.060186	-2.50857
Q3TLP5	-2.15448	16.2009	-3.15247	0.00589511	0.0605525	-2.51595
Q6VN19	4.42334	12.6407	3.14949	0.0059327	0.060743	-2.52199
Q8C6I2	3.27418	10.4971	3.14941	0.00593374	0.060743	-2.52216
Q99L88	-0.560858	19.1533	-3.14831	0.0059478	0.0607841	-2.52441
Q8BHK3	1.49251	15.142	3.14603	0.00597681	0.0609776	-2.52903
Q3UMW8	2.37415	13.9991	3.13676	0.00609621	0.0620911	-2.54782
Q9EQ61	3.32427	12.8161	3.13544	0.00611344	0.0621619	-2.5505
Q8R2G4	-1.19105	18.3073	-3.13239	0.00615328	0.062462	-2.55667
Q9WU40	3.32103	10.6757	3.13061	0.00617672	0.0625333	-2.56028
Q8C2K1	2.87015	10.8402	3.13029	0.00618097	0.0625333	-2.56093
Q8QZY1	0.721366	17.2483	3.12823	0.00620823	0.0627041	-2.56511
Q91ZP3	0.841344	18.1474	3.12741	0.00621913	0.0627095	-2.56678
Q8C0D4	2.65126	12.0458	3.1258	0.00624051	0.0628205	-2.57004
P68033	0.916735	25.2802	3.12407	0.00626352	0.0628853	-2.57353
Q8VC31	3.72317	13.6576	3.12291	0.00627905	0.0628853	-2.57588
Q8BTZ4	4.84609	14.7309	3.1228	0.00628055	0.0628853	-2.57611
Q8BTY1	1.58224	15.0575	3.1222	0.00628853	0.0628853	-2.57731
O88455	1.14979	17.0292	3.12019	0.00631564	0.0630522	-2.5814
Q9QYI3	0.868944	15.9385	3.11846	0.00633893	0.0631505	-2.58489
A2A5R2	0.692634	15.4383	3.11791	0.00634636	0.0631505	-2.58601
Q8VCH0	0.972462	15.3684	3.11349	0.0064065	0.0635684	-2.59496
Q8BGY7	3.65545	14.6474	3.11328	0.00640938	0.0635684	-2.59538
P09581	0.826061	16.9632	3.10918	0.0064657	0.0637576	-2.60369
Q9EPV8	3.16058	11.4448	3.11085	0.00644266	0.0637576	-2.6003
Q99PU5	-4.26004	11.9762	-3.10983	0.00645669	0.0637576	-2.60236
Q8R050	0.636615	18.1231	3.10882	0.00647061	0.0637576	-2.60441
Q8VBT6	3.6628	14.943	3.10419	0.0065348	0.0642854	-2.61377
Q8BMJ2	0.748795	17.9881	3.103	0.0065513	0.0643431	-2.61616
Q01721	-1.4008	13.9206	-3.10148	0.00657265	0.0644482	-2.61925
Q9Z2D6	-2.50578	14.6936	-3.10036	0.00658827	0.0644969	-2.6215
Q921M7	1.01058	17.2184	3.09881	0.00661007	0.0646029	-2.62464
Q8VDD8	2.54107	14.4447	3.09808	0.00662046	0.0646029	-2.62613
Q9DC50	2.8991	14.1881	3.09434	0.00667334	0.0649716	-2.63367
Q91WE1	2.9479	12.6209	3.09207	0.00670569	0.0649716	-2.63826
Q99L20	-1.10553	16.5496	-3.09176	0.00671019	0.0649716	-2.63889
Q3TW96	1.28808	18.2725	3.09141	0.00671511	0.0649716	-2.63959
Q8C3J5	1.50081	15.0478	3.09103	0.00672062	0.0649716	-2.64037
P62257	0.755468	16.142	3.09089	0.00672268	0.0649716	-2.64066
Q61234	-0.894293	16.9738	-3.08735	0.00677357	0.065359	-2.64781
Q9CR70	3.1806	12.7222	3.08489	0.00680909	0.0655972	-2.65277
Q9JLM9	3.16622	11.1471	3.08285	0.00683867	0.0657774	-2.65688
Q05144	1.02391	17.8116	3.08029	0.00687611	0.0660325	-2.66205
Q80XP8	3.81954	10.7001	3.07834	0.00690473	0.0660484	-2.66599
Q9D1R9	0.816128	18.0453	3.07718	0.00692175	0.0660484	-2.66832
Q80UG2	-1.06038	18.9387	-3.07611	0.00693752	0.0660484	-2.67048
P97363	0.860749	15.2058	3.07588	0.00694101	0.0660484	-2.67096
Q8VCI0	0.819519	17.2315	3.07546	0.00694713	0.0660484	-2.67179
Q8CGC7	0.636072	18.6725	3.07469	0.00695859	0.0660484	-2.67335
Q921G6	2.20901	15.0597	3.07459	0.00696009	0.0660484	-2.67356
P62700	2.87208	11.3555	3.07361	0.00697467	0.0660484	-2.67554
Q9Z1B5	4.02866	12.7453	3.07351	0.00697602	0.0660484	-2.67572
Q5SSZ5	-1.74628	22.4469	-3.07212	0.00699668	0.0660588	-2.67853
Q8BTZ7	0.727021	18.964	3.07197	0.00699896	0.0660588	-2.67884
Q3U3R4	-0.803332	16.866	-3.06906	0.00704241	0.0663557	-2.6847
Q9Z1B3	1.90722	15.1008	3.06772	0.00706264	0.0663557	-2.68742
Q793I8	3.04117	11.5591	3.06767	0.00706332	0.0663557	-2.68751
Q8K4M5	3.18675	12.6542	3.06456	0.00711024	0.0665233	-2.69378
Q8BUN5	2.1801	13.8642	3.06317	0.00713124	0.0665233	-2.69658
Q9JHK4	0.807653	16.3559	3.06289	0.00713553	0.0665233	-2.69715
Q8K1I3	3.58564	12.511	3.06242	0.00714272	0.0665233	-2.6981
Q91V76	0.813928	20.0517	3.06239	0.0071432	0.0665233	-2.69816
Q6GV12	-0.876295	16.9283	-3.06182	0.00715186	0.0665233	-2.69931
Q58A65	0.744882	17.0224	3.0614	0.00715812	0.0665233	-2.70014
P35821	0.860736	16.1301	3.06045	0.00717266	0.0665561	-2.70206
Q8CEC0	2.48758	14.4702	3.05902	0.00719452	0.0666568	-2.70495
O35127	2.5645	12.1005	3.05814	0.00720795	0.0666791	-2.70671
Q3TPX4	0.746319	16.2924	3.05735	0.00722005	0.066689	-2.7083
O70310	0.795312	17.0316	3.05632	0.00723593	0.0667338	-2.71038
Q9D7B7	3.71574	15.4924	3.05537	0.00725052	0.0667666	-2.71229
O09164	1.01957	19.9255	3.0521	0.00730123	0.0671314	-2.71889
Q9CQ86	0.813075	17.4221	3.05068	0.00732327	0.0672318	-2.72174
A2AR02	2.64754	13.2079	3.04899	0.00734957	0.0673711	-2.72514
Q8C033	2.9124	12.463	3.04822	0.00736172	0.0673804	-2.7267
Q91Z22	3.28654	13.5156	3.04615	0.00739409	0.0675449	-2.73085
Q8R010	0.776541	16.5056	3.04565	0.00740202	0.0675449	-2.73187
Q4VC33	2.82237	13.8665	3.03711	0.00753764	0.0686788	-2.74905
Q8BY71	3.05953	11.3638	3.03529	0.0075667	0.0688018	-2.7527
Q3V384	-0.975054	14.6026	-3.03462	0.00757755	0.0688018	-2.75405
P51410	0.606833	17.1219	3.03391	0.00758893	0.0688018	-2.75547
Q8VHX6	0.769811	19.3801	3.03344	0.00759663	0.0688018	-2.75643
O08528	-0.682052	18.2894	-3.03063	0.00764209	0.069041	-2.76208
Q62148	-0.699074	20.73	-3.03025	0.00764826	0.069041	-2.76284
Q9CQ91	-0.888018	17.9002	-3.02969	0.00765733	0.069041	-2.76396
Q922J9	1.88804	14.4627	3.02843	0.00767782	0.069041	-2.76649
Q8BVU5	2.62917	14.1214	3.02775	0.00768888	0.069041	-2.76785
Q91ZH7	-2.97423	13.3967	-3.02701	0.00770106	0.069041	-2.76935
O55098	1.06626	15.279	3.02653	0.00770893	0.069041	-2.77031
P22682	1.21132	15.1435	3.0262	0.00771434	0.069041	-2.77098
P28656	0.754406	19.4958	3.02119	0.00779672	0.0696753	-2.78103
Q6P8J7	1.11369	16.8474	3.01989	0.00781828	0.0697649	-2.78364
Q9CQN7	2.69378	12.3062	3.01662	0.00787277	0.0701476	-2.7902
Q91WE2	4.22988	16.9468	3.01541	0.00789309	0.0702253	-2.79264
P61161	0.962461	17.3399	3.01334	0.00792788	0.0704115	-2.7968
P70182	3.13489	10.4856	3.0125	0.00794196	0.0704115	-2.79848
Q61542	2.10154	13.223	3.01138	0.00796089	0.0704115	-2.80073
Q9JKP7	2.8267	12.3164	3.01099	0.00796747	0.0704115	-2.80151
O70161	3.21265	14.0854	3.01071	0.00797221	0.0704115	-2.80207
Q8BZM1	1.49621	13.202	3.0094	0.00799438	0.0705044	-2.8047
Q8VDD5	0.740956	21.1079	3.00869	0.00800637	0.0705074	-2.80612
Q61152	1.16586	14.3291	3.00579	0.00805585	0.07084	-2.81194
Q9DC04	3.2056	11.1136	3.00471	0.00807429	0.070899	-2.8141
Q61792	0.751228	19.7582	3.00341	0.00809666	0.0709924	-2.81671
O55100	4.04405	12.4318	3.00224	0.0081168	0.0710661	-2.81906
O88856	2.80564	14.7306	2.99693	0.00820861	0.0717465	-2.82969
P26151	3.43344	13.4763	2.99638	0.00821823	0.0717465	-2.8308
Q9CWW6	2.38605	14.2743	2.99382	0.00826298	0.0717892	-2.83593
P37040	-0.73497	21.6168	-2.99328	0.00827242	0.0717892	-2.83701
Q3UGC7	0.752083	17.1956	2.99298	0.0082777	0.0717892	-2.83761
Q3TJZ6	0.788445	15.9882	2.99268	0.00828296	0.0717892	-2.83821
Q8C0I1	0.995907	15.4354	2.9923	0.00828967	0.0717892	-2.83897
Q8K1A6	-2.683	16.0708	-2.99203	0.00829433	0.0717892	-2.83951
Q7TPV4	0.88911	15.1812	2.98966	0.00833624	0.0719092	-2.84427
Q91VK1	0.763084	16.6085	2.98938	0.00834111	0.0719092	-2.84482
P30355	2.41718	17.811	2.98923	0.00834384	0.0719092	-2.84513
Q61419	2.99845	11.1943	2.98814	0.00836303	0.071972	-2.8473
O70622	2.59043	15.5234	2.98744	0.00837554	0.0719773	-2.84871
E9PVX6	2.82727	9.72743	2.98601	0.00840096	0.0720678	-2.85157
P14106	1.02833	17.7776	2.9855	0.00840989	0.0720678	-2.85257
O88271	3.16391	12.5051	2.98445	0.0084288	0.0721276	-2.8547
Q9D1M7	3.64986	12.8806	2.98295	0.00845559	0.0722547	-2.85769
Q7JJ13	2.95472	12.2626	2.98095	0.00849148	0.0723218	-2.86169
O54824	0.805637	15.6371	2.98053	0.00849894	0.0723218	-2.86252
Q6PGL7	2.19367	14.5581	2.98051	0.0084993	0.0723218	-2.86256
Q8BYY4	2.74309	13.7146	2.97965	0.00851488	0.0723526	-2.86429
Q3UIA2	0.983246	16.5998	2.97587	0.00858333	0.0727598	-2.87185
Q9QZ73	0.907603	15.5402	2.97568	0.00858686	0.0727598	-2.87224
Q8VDG5	2.86464	14.8535	2.97301	0.00863555	0.0730701	-2.87758
O08800	1.21896	17.668	2.9707	0.00867779	0.0732582	-2.88218
P30993	1.36738	16.2564	2.97047	0.00868201	0.0732582	-2.88264
Q8CHW4	0.63909	15.7593	2.96445	0.00879334	0.0740244	-2.89466
Q9ESJ0	2.34109	16.5441	2.96407	0.00880044	0.0740244	-2.89543
Q99P88	0.780963	15.779	2.96331	0.0088146	0.0740244	-2.89694
P43025	1.0512	16.1375	2.96255	0.0088289	0.0740244	-2.89847
Q61937	0.992377	17.8442	2.96163	0.0088461	0.0740244	-2.90031
Q6ZQ73	1.35804	16.7935	2.96118	0.00885448	0.0740244	-2.9012
O08784	0.750188	15.9502	2.96074	0.00886266	0.0740244	-2.90207
Q99ME2	2.22314	10.7722	2.96032	0.0088707	0.0740244	-2.90293
Q01102	2.29374	14.6907	2.95647	0.00894318	0.0744747	-2.91061
P01898	0.643138	17.823	2.95615	0.00894928	0.0744747	-2.91125
Q99L27	0.885396	16.8908	2.95395	0.00899098	0.0746344	-2.91563
Q02105	1.18993	16.689	2.95384	0.00899313	0.0746344	-2.91586
Q80U87	0.95006	16.5345	2.95301	0.0090088	0.0746619	-2.9175
Q9CRC9	2.5311	15.0504	2.95108	0.00904574	0.0748656	-2.92136
Q9WVA4	1.01967	20.1196	2.94851	0.00909507	0.0750877	-2.92649
Q8BHC9	-0.821344	15.4515	-2.94839	0.0090974	0.0750877	-2.92673
Q8BX80	0.843031	16.328	2.94557	0.00915173	0.0752874	-2.93234
Q99P72	1.08471	20.5174	2.94522	0.00915847	0.0752874	-2.93304
Q91VI7	0.935522	20.5192	2.9448	0.00916669	0.0752874	-2.93388
Q91WB4	2.81662	15.0967	2.94456	0.00917138	0.0752874	-2.93437
P59999	1.05701	20.2503	2.94324	0.00919689	0.0753725	-2.93699
Q62277	3.63925	13.1395	2.94247	0.00921197	0.0753725	-2.93853
Q68FD5	0.697073	21.843	2.9421	0.00921912	0.0753725	-2.93926
Q8C0T5	2.99454	10.3594	2.9411	0.00923869	0.0754159	-2.94126
P42227	0.833455	15.3615	2.93891	0.00928157	0.0754159	-2.94563
Q8R0H9	0.861254	16.9319	2.93887	0.00928222	0.0754159	-2.94569
Q8R5H1	0.600826	15.8067	2.93837	0.00929203	0.0754159	-2.94669
Q6ZQI3	0.6746	18.1095	2.93826	0.00929435	0.0754159	-2.94692
Q61543	1.01333	16.9444	2.93801	0.00929922	0.0754159	-2.94742
Q8CF66	0.745222	17.9167	2.93725	0.00931405	0.0754351	-2.94892
Q9DBG5	0.793075	17.6187	2.93598	0.00933916	0.0754497	-2.95146
P17047	0.825539	18.3176	2.9359	0.0093408	0.0754497	-2.95162
Q99L45	0.697063	16.9035	2.93198	0.00941851	0.075976	-2.95943
P61759	2.34224	13.9098	2.93059	0.00944613	0.0760973	-2.96219
Q9D7J9	-0.864571	16.5754	-2.9274	0.00951005	0.0764631	-2.96854
Q8K0P3	1.96408	13.4179	2.92676	0.00952292	0.0764631	-2.96982
Q91VR5	0.660518	17.6133	2.92577	0.0095428	0.0764631	-2.97178
Q3TYX2	2.2787	15.7114	2.92546	0.009549	0.0764631	-2.97239
Q3ULD5	-0.665447	18.9375	-2.92518	0.00955473	0.0764631	-2.97296
Q9DBH0	3.35688	11.4632	2.92196	0.0096199	0.076684	-2.97936
Q91XB7	2.35201	15.4722	2.92167	0.00962566	0.076684	-2.97992
Q9JHW9	1.94283	14.6301	2.9216	0.00962721	0.076684	-2.98008
P56565	-3.03151	11.8106	-2.92131	0.00963303	0.076684	-2.98065
P29595	0.864743	17.8664	2.9201	0.00965765	0.0767413	-2.98305
Q9D8N0	0.688762	21.1676	2.91971	0.0096656	0.0767413	-2.98382
Q99LI8	0.657317	17.816	2.91836	0.00969326	0.07686	-2.98652
Q99PL5	0.558401	19.4087	2.91586	0.00974462	0.0771661	-2.99149
P70175	3.34544	10.7643	2.91394	0.0097842	0.0773102	-2.99531
O88597	1.87198	15.418	2.91373	0.00978837	0.0773102	-2.99571
O35382	0.739993	16.5832	2.91104	0.00984428	0.077577	-3.00107
Q9DBL1	-0.673833	18.8077	-2.91072	0.00985077	0.077577	-3.00169
P52633	0.646915	16.4799	2.9102	0.00986155	0.077577	-3.00272
Q5HZI1	-3.59874	14.4434	-2.90908	0.00988498	0.077577	-3.00496
P49717	3.21956	14.944	2.90902	0.00988626	0.077577	-3.00508
Q9EQG9	0.556436	16.8561	2.90663	0.00993628	0.0778272	-3.00983
Q3U487	0.743824	16.2589	2.90626	0.00994387	0.0778272	-3.01055
P62862	2.28438	16.1101	2.90546	0.00996071	0.0778583	-3.01214
Q9CPR4	1.05753	17.9594	2.90418	0.0099876	0.0779678	-3.01468
P23780	0.736174	18.8794	2.9035	0.010002	0.0779791	-3.01603
P36993	-0.76846	16.6762	-2.9013	0.0100485	0.078209	-3.0204
P62137	0.470519	18.3628	2.90089	0.0100573	0.078209	-3.02122
Q9JI46	1.08078	16.7929	2.89589	0.0101638	0.0789355	-3.03113
Q9Z2Z6	0.686396	18.7254	2.89507	0.0101813	0.0789704	-3.03275
Q99KY4	0.750339	16.8376	2.89076	0.0102742	0.0795888	-3.0413
Q8CFH6	-0.9941	14.4545	-2.88784	0.0103376	0.0799778	-3.04708
Q9DC69	-0.663428	17.2911	-2.88713	0.0103532	0.079996	-3.0485
P0C8K7	-1.13663	17.3259	-2.88539	0.0103913	0.080005	-3.05195
Q9DCM0	0.828714	16.3155	2.88524	0.0103944	0.080005	-3.05223
Q3UPH1	0.754542	17.2074	2.88415	0.0104184	0.080005	-3.0544
P62962	1.00483	22.3811	2.88409	0.0104197	0.080005	-3.05452
O35250	1.26809	15.7505	2.88354	0.0104317	0.080005	-3.05561
Q91YQ1	2.8601	12.3727	2.88312	0.0104411	0.080005	-3.05645
P70389	0.726254	17.0109	2.88236	0.0104578	0.080005	-3.05795
Q6P549	0.90979	14.7973	2.88158	0.0104749	0.080005	-3.05949
Q8VDP3	1.25393	15.8658	2.88139	0.0104791	0.080005	-3.05987
P57780	0.688759	19.9293	2.88105	0.0104866	0.080005	-3.06054
Q9WUN2	1.8517	14.5498	2.87948	0.0105214	0.080129	-3.06366
Q9CQ40	3.43718	12.1257	2.87912	0.0105294	0.080129	-3.06436
Q8VD75	0.654366	17.7704	2.87752	0.0105649	0.0802985	-3.06753
P62880	-0.741228	18.6253	-2.87497	0.0106218	0.0805528	-3.07258
Q08943	0.637297	16.1535	2.8748	0.0106255	0.0805528	-3.07291
Q6PD28	2.24666	14.656	2.87423	0.0106383	0.0805528	-3.07404
P14483	0.736613	16.7911	2.87362	0.010652	0.0805559	-3.07525
P62754	0.795016	19.1479	2.87255	0.0106759	0.0806357	-3.07736
Q9R0G7	2.84239	13.7046	2.87103	0.0107102	0.080794	-3.08037
Q9D0I4	0.820681	16.746	2.86968	0.0107408	0.0809235	-3.08305
Q9R008	0.531175	16.6026	2.86699	0.0108017	0.0812817	-3.08837
P63328	0.700966	17.8819	2.86529	0.0108404	0.0814712	-3.09172
Q8BUE4	0.486323	19.1533	2.86374	0.0108757	0.0816351	-3.09478
Q8CFI2	0.870111	15.8136	2.86291	0.0108948	0.0816772	-3.09643
Q8K394	3.75166	11.4901	2.86138	0.0109299	0.0818389	-3.09945
Q9D0K2	0.6345	18.9931	2.86039	0.0109528	0.0819089	-3.10141
Q61712	2.00144	15.4825	2.8572	0.0110264	0.0823575	-3.1077
P11688	0.926619	16.8653	2.85611	0.0110516	0.0823656	-3.10985
Q9CXT7	2.87902	13.814	2.85598	0.0110547	0.0823656	-3.11011
Q3V3R1	2.54709	15.1308	2.8548	0.0110823	0.0824121	-3.11245
Q9D136	-2.02003	14.843	-2.85454	0.0110882	0.0824121	-3.11295
Q8VE99	2.60861	13.842	2.85327	0.0111178	0.0824783	-3.11546
Q62147	-2.78986	15.1469	-2.85275	0.01113	0.0824783	-3.11649
Q9CQW1	0.602449	16.5093	2.85123	0.0111658	0.0824783	-3.1195
Q9CR20	0.874516	17.0766	2.85093	0.0111727	0.0824783	-3.12008
P28063	0.793164	18.4678	2.85073	0.0111774	0.0824783	-3.12047
Q8K0B2	3.20047	12.9861	2.85021	0.0111896	0.0824783	-3.1215
Q8CCF0	2.45943	13.9789	2.85009	0.0111925	0.0824783	-3.12174
Q8BHL8	0.756787	17.2338	2.84727	0.011259	0.0828362	-3.12731
Q812E0	2.61132	12.4983	2.84687	0.0112685	0.0828362	-3.12809
Q8BG73	1.0707	16.4955	2.84572	0.0112958	0.0829365	-3.13037
Q9DCD2	-1.44709	15.8005	-2.84413	0.0113334	0.0831119	-3.13349
O09012	0.53759	16.9529	2.84241	0.0113745	0.0832956	-3.13688
Q9Z1Q5	1.09686	18.8099	2.84193	0.011386	0.0832956	-3.13783
P47754	0.799662	21.005	2.83905	0.0114552	0.0835986	-3.14352
Q99P30	1.05203	19.2849	2.8388	0.0114611	0.0835986	-3.144
Q9D8Z6	2.36681	11.0902	2.83848	0.0114689	0.0835986	-3.14464
P58252	0.715432	22.6208	2.83623	0.0115232	0.0836323	-3.14907
Q9DBQ7	1.04201	15.0613	2.83609	0.0115265	0.0836323	-3.14934
P14211	0.794491	21.616	2.836	0.0115287	0.0836323	-3.14952
Q8JZQ9	0.553327	18.1083	2.8358	0.0115336	0.0836323	-3.14992
P28843	-1.02928	17.4474	-2.83542	0.0115426	0.0836323	-3.15065
P24549	-0.76524	19.2172	-2.83296	0.0116026	0.0839664	-3.15552
Q9JKY5	3.5521	14.0177	2.83162	0.0116353	0.0841023	-3.15815
Q8R3D1	0.62532	16.2261	2.83092	0.0116524	0.0841251	-3.15953
Q8BG07	0.685615	16.5137	2.82738	0.0117393	0.0843845	-3.1665
Q9R1J0	0.915956	19.005	2.82723	0.011743	0.0843845	-3.1668
Q8K2I3	-0.798827	18.1589	-2.82715	0.011745	0.0843845	-3.16695
Q9D868	1.76922	15.3051	2.82685	0.0117523	0.0843845	-3.16754
A6H8H2	1.70545	15.3128	2.82662	0.011758	0.0843845	-3.168
P14847	2.53814	14.9144	2.82532	0.0117899	0.0845133	-3.17054
Q6A028	1.33856	15.9473	2.82317	0.0118433	0.0847954	-3.17477
P62274	1.74807	16.1637	2.82255	0.0118588	0.084806	-3.176
Q61035	0.593398	18.7805	2.81756	0.0119835	0.0855492	-3.1858
Q571E4	1.1867	16.6956	2.81726	0.011991	0.0855492	-3.18639
B8JK39	3.76548	13.0149	2.81368	0.0120814	0.0860925	-3.19343
Q99JY3	0.702148	17.4355	2.81284	0.0121028	0.0861434	-3.19509
Q6PAV2	0.769968	15.0949	2.81151	0.0121365	0.0862755	-3.19769
Q9D0I9	0.584125	17.9641	2.81098	0.0121499	0.0862755	-3.19873
Q5F285	1.70533	10.6674	2.80989	0.0121778	0.0863724	-3.20088
Q9QXA5	2.27543	15.5785	2.8093	0.0121928	0.0863778	-3.20203
Q8CI08	1.79261	14.7041	2.80777	0.012232	0.0865542	-3.20504
Q9D4H2	3.20763	12.8851	2.8053	0.0122955	0.0868429	-3.20989
P13439	0.648327	15.9611	2.80506	0.0123016	0.0868429	-3.21035
Q9CXU9	2.36384	14.0897	2.80418	0.0123244	0.0868466	-3.21209
Q8CHH9	0.967172	16.6337	2.80393	0.0123308	0.0868466	-3.21257
P99024	0.638991	20.1938	2.80181	0.0123857	0.0870059	-3.21673
Q8R4X3	3.15575	14.3036	2.80134	0.0123979	0.0870059	-3.21766
Q6NZC7	0.537407	16.8017	2.80129	0.0123991	0.0870059	-3.21775
Q571I9	0.911917	16.3698	2.80084	0.0124109	0.0870059	-3.21864
Q6PB44	0.810005	16.4799	2.79951	0.0124456	0.0870583	-3.22125
Q91YU6	2.19895	9.69057	2.79945	0.0124472	0.0870583	-3.22137
A3KGB4	1.58092	13.94	2.79771	0.0124926	0.0872405	-3.22478
Q9QXS6	2.08045	16.5075	2.79734	0.0125021	0.0872405	-3.22549
P97300	-0.736489	18.57	-2.79475	0.0125701	0.0875882	-3.23058
P25206	2.1462	13.8648	2.7938	0.0125953	0.0875882	-3.23245
Q2YDW2	2.28706	14.3023	2.79379	0.0125953	0.0875882	-3.23245
Q5U4D8	-2.77446	10.7193	-2.79187	0.0126461	0.0877817	-3.23622
P97346	1.82143	14.8574	2.79017	0.0126913	0.0877817	-3.23956
O89023	0.734627	18.3078	2.78996	0.012697	0.0877817	-3.23998
Q3TV70	2.54342	10.988	2.78972	0.0127032	0.0877817	-3.24044
Q3TVP5	3.41824	15.0013	2.78901	0.0127222	0.0877817	-3.24184
Q6P6J9	1.52809	15.1954	2.78881	0.0127273	0.0877817	-3.24221
Q9Z1T1	0.652679	18.4572	2.78877	0.0127285	0.0877817	-3.2423
P97499	0.774271	15.514	2.78837	0.0127392	0.0877817	-3.24309
Q9D1E6	0.624386	18.8969	2.78717	0.0127711	0.0879011	-3.24543
Q9D4H8	0.642214	15.2629	2.78593	0.0128043	0.0879798	-3.24786
P54823	0.693098	16.7022	2.78566	0.0128116	0.0879798	-3.24839
Q8VEE4	2.12456	13.3231	2.78333	0.0128742	0.0883092	-3.25295
Q8BH44	2.09768	14.5971	2.78003	0.0129633	0.0888201	-3.25941
Q7M6Y3	0.692996	18.9221	2.77908	0.0129892	0.0888633	-3.26127
P58044	0.754678	15.0253	2.77818	0.0130135	0.0888633	-3.26302
P27612	0.635698	17.7387	2.77818	0.0130137	0.0888633	-3.26304
E9Q394	0.792759	15.1616	2.77619	0.0130679	0.0891038	-3.26692
O88413	3.13936	11.5832	2.77581	0.0130784	0.0891038	-3.26767
Q9CPU4	-0.760507	19.46	-2.77451	0.0131139	0.0892456	-3.27021
B1AVZ0	4.21059	13.0796	2.77224	0.0131761	0.0895681	-3.27464
Q8BGD8	2.01394	10.5392	2.77154	0.0131955	0.0895991	-3.27601
Q9D1G5	2.55845	15.473	2.76991	0.0132404	0.0897055	-3.27919
P10833	-0.715403	20.9481	-2.76967	0.0132471	0.0897055	-3.27967
Q8BMJ3	2.97945	15.5243	2.76936	0.0132557	0.0897055	-3.28027
Q920E5	0.810291	16.288	2.76865	0.0132754	0.0897389	-3.28166
P28654	-1.0907	20.8931	-2.76608	0.013347	0.0900292	-3.28669
Q9WUD8	2.43693	14.9674	2.76604	0.0133481	0.0900292	-3.28677
Q5F2F2	-0.548854	16.9952	-2.76475	0.0133841	0.0900982	-3.28928
P50136	-0.592526	18.0951	-2.7646	0.0133882	0.0900982	-3.28957
Q9DCV3	-0.658332	16.6839	-2.76373	0.0134125	0.0901617	-3.29126
Q9JKC7	2.8429	12.9935	2.76294	0.0134348	0.0902112	-3.29281
Q62418	0.878114	17.9661	2.76057	0.0135014	0.0902902	-3.29744
Q91WJ8	0.784291	18.1698	2.76055	0.0135019	0.0902902	-3.29747
O88895	3.97837	14.011	2.76044	0.013505	0.0902902	-3.29769
A2AJI0	1.73578	16.2536	2.7604	0.0135062	0.0902902	-3.29777
Q8BMK4	1.18036	15.568	2.75805	0.0135727	0.0905674	-3.30236
Q80XS6	2.75694	11.1955	2.75787	0.0135776	0.0905674	-3.3027
Q8K1R7	0.562371	16.667	2.75722	0.0135961	0.0905906	-3.30397
P60843	0.673977	21.6246	2.75663	0.0136128	0.0906024	-3.30512
Q9JII5	0.874273	16.7921	2.75463	0.0136698	0.0908815	-3.30902
Q7TQ95	0.640899	17.1423	2.75067	0.0137834	0.0915362	-3.31676
Q61285	-0.750152	19.8514	-2.74676	0.0138963	0.0921846	-3.32437
Q922H4	0.798649	16.9135	2.74487	0.0139511	0.0924281	-3.32805
Q9QUR6	0.645258	18.4027	2.74364	0.013987	0.0924281	-3.33045
Q91YW3	0.819266	17.2917	2.74355	0.0139894	0.0924281	-3.33061
Q8BPM0	2.81158	11.9392	2.74339	0.0139941	0.0924281	-3.33093
Q8CIA5	1.81739	15.0714	2.74239	0.0140234	0.0924679	-3.33288
Q80U58	2.06858	11.6584	2.74214	0.0140307	0.0924679	-3.33336
Q5SVR0	0.543148	17.8263	2.74109	0.0140614	0.0924977	-3.3354
Q9WV86	-0.758407	19.5118	-2.74094	0.0140658	0.0924977	-3.3357
P39039	2.0339	15.874	2.74034	0.0140835	0.0925134	-3.33687
Q61166	0.719391	17.9693	2.73935	0.0141127	0.0926047	-3.3388
Q9JI11	2.91937	13.442	2.73412	0.0142674	0.0935184	-3.34898
P62075	2.00889	15.7479	2.73287	0.0143045	0.0936603	-3.35141
Q8BP27	3.56357	11.2296	2.73096	0.0143614	0.0939314	-3.35511
Q91VX2	1.99382	14.6636	2.72913	0.0144163	0.0941887	-3.35868
Q8CFD4	1.73102	14.8971	2.72777	0.0144574	0.0943136	-3.36133
Q921L5	0.970603	15.1404	2.72708	0.0144782	0.0943136	-3.36267
Q9WV32	1.00723	18.7433	2.72661	0.0144923	0.0943136	-3.36358
Q9JIG7	0.652513	15.714	2.72642	0.0144978	0.0943136	-3.36393
Q01279	-0.669518	20.7346	-2.72588	0.0145141	0.0943185	-3.36499
P09103	0.708706	21.422	2.72464	0.0145516	0.0944606	-3.36739
Q9D1F4	0.643049	16.3433	2.72181	0.0146377	0.094884	-3.3729
Q8C4Q6	1.82454	14.8503	2.72071	0.0146712	0.094884	-3.37503
O55236	2.57926	11.8846	2.72067	0.0146727	0.094884	-3.37512
Q9ET66	3.37092	12.3242	2.71952	0.0147077	0.094884	-3.37734
Q6IRU2	0.978303	18.8013	2.71945	0.01471	0.094884	-3.37749
Q8K5B2	2.97515	11.7064	2.71924	0.0147163	0.094884	-3.37789
B2RWS6	2.37709	12.8803	2.7189	0.0147266	0.094884	-3.37854
Q9QXL2	2.66938	12.7527	2.71813	0.0147503	0.0949357	-3.38004
Q6X893	-0.544818	16.0086	-2.71734	0.0147746	0.094991	-3.38158
Q8BWW4	3.24046	12.3896	2.71591	0.0148186	0.0951695	-3.38435
Q9R061	0.711428	17.0422	2.71542	0.0148339	0.0951695	-3.38531
Q91YX0	2.15994	13.2404	2.71389	0.0148811	0.0953712	-3.38827
Q5SSW2	0.632382	13.7995	2.71325	0.0149008	0.0953968	-3.38951
O35551	1.8893	14.2545	2.71124	0.0149632	0.0956947	-3.3934
P50427	0.844091	17.902	2.70966	0.0150126	0.0959094	-3.39648
P56395	-0.598695	22.187	-2.70785	0.0150691	0.0961687	-3.39998
Q64133	0.775789	19.4769	2.70683	0.0151012	0.0961915	-3.40196
O70475	0.801013	17.6855	2.70672	0.0151045	0.0961915	-3.40216
Q9Z2I8	-0.792038	16.0642	-2.70498	0.0151594	0.0964065	-3.40554
Q01405	0.717396	18.3138	2.70464	0.0151701	0.0964065	-3.4062
P61600	2.791	11.9285	2.70372	0.015199	0.0964889	-3.40798
Q9CY45	3.69761	14.174	2.70219	0.0152476	0.0966959	-3.41095
P07091	1.25175	18.4814	2.70021	0.0153103	0.0969921	-3.41478
P48036	0.756581	23.4575	2.69853	0.0153639	0.0971526	-3.41803
Q8BQM4	2.43178	13.2245	2.69806	0.0153788	0.0971526	-3.41893
Q9WU78	0.693842	18.5111	2.69791	0.0153838	0.0971526	-3.41924
B9EJ86	0.876514	15.888	2.69475	0.0154851	0.09769	-3.42535
Q9QZS0	-2.34183	12.3022	-2.69049	0.0156227	0.0984469	-3.43359
P53395	-0.59162	18.0644	-2.69003	0.0156376	0.0984469	-3.43448
P26638	0.658984	19.1328	2.68769	0.0157136	0.0988226	-3.43899
Q9WUP7	0.781062	17.0646	2.68662	0.0157487	0.0989389	-3.44107
A2AQ19	3.97697	12.6998	2.68612	0.0157648	0.0989389	-3.44202
Q99JX3	0.825774	16.6031	2.68464	0.0158134	0.0991031	-3.44489
Q3TDD9	-2.39691	17.6192	-2.68433	0.0158237	0.0991031	-3.44549
P59808	0.862036	15.3634	2.68328	0.0158583	0.0992168	-3.44753
P53612	4.56666	11.842	2.68235	0.0158889	0.0993058	-3.44932
Q9D1E8	2.44147	13.4179	2.67962	0.0159789	0.0997651	-3.45458
Q8C052	0.759384	17.7914	2.67913	0.0159954	0.0997651	-3.45554
Q9D0L7	-3.10062	14.8152	-2.6764	0.0160861	0.10017	-3.4608
Q8BZS9	0.649076	16.0646	2.6755	0.016116	0.10017	-3.46253
Q8VCR7	-0.753789	20.4131	-2.67548	0.0161168	0.10017	-3.46257
P47226	1.20896	14.6824	2.67519	0.0161266	0.10017	-3.46314
Q8BP40	-0.721793	16.6178	-2.67457	0.0161473	0.100194	-3.46433
Q9CR51	0.934524	16.9431	2.67191	0.0162366	0.100194	-3.46946
Q9CZ28	2.91729	10.9435	2.67144	0.0162524	0.100194	-3.47037
Q91WR3	2.30633	13.2189	2.67131	0.0162568	0.100194	-3.47062
Q8R1K1	3.37099	11.9009	2.67108	0.0162646	0.100194	-3.47107
Q62465	0.928576	20.3613	2.67098	0.0162678	0.100194	-3.47125
Q80YW0	2.16261	15.4846	2.6709	0.0162704	0.100194	-3.4714
Q8CIX8	-0.749756	14.707	-2.67065	0.0162788	0.100194	-3.47188
Q9CQS8	0.638035	19.5687	2.67063	0.0162795	0.100194	-3.47192
P62960	0.720973	17.8709	2.66907	0.0163324	0.100418	-3.47494
O54931	0.745967	17.938	2.66785	0.0163739	0.100502	-3.47729
Q6P542	0.690925	16.7328	2.6675	0.0163855	0.100502	-3.47795
Q8BJ48	3.49907	11.4389	2.66676	0.0164108	0.100502	-3.47939
Q8VCS3	2.62075	12.8213	2.6667	0.0164126	0.100502	-3.47949
P11928	2.67901	11.9239	2.66437	0.0164922	0.100693	-3.48399
Q14DH7	-0.64478	17.0363	-2.66389	0.0165087	0.100693	-3.48492
Q3UZA1	2.48797	13.8582	2.6635	0.0165221	0.100693	-3.48567
Q8C5P7	0.959001	16.1485	2.66343	0.0165242	0.100693	-3.48579
P05064	0.62256	20.795	2.66335	0.016527	0.100693	-3.48595
Q9D8T2	0.942891	16.5979	2.6622	0.0165666	0.100833	-3.48817
Q6Y7W8	1.66549	13.7234	2.66164	0.0165856	0.100847	-3.48924
P63028	0.687026	17.7034	2.66047	0.0166259	0.100907	-3.4915
Q9JMH9	0.928812	15.5998	2.66039	0.0166289	0.100907	-3.49166
O89020	1.03422	16.923	2.65938	0.0166635	0.100994	-3.4936
P47856	0.701413	15.4865	2.659	0.0166766	0.100994	-3.49433
Q6PDL0	0.770727	16.6928	2.65748	0.0167291	0.101211	-3.49725
Q8BKT7	3.33521	11.5752	2.65458	0.0168301	0.10172	-3.50284
Q62351	0.685057	15.3778	2.65372	0.0168598	0.101798	-3.50448
Q2TBA3	0.691889	16.0218	2.6518	0.0169269	0.101982	-3.50817
Q3U0V2	1.49889	14.6222	2.65116	0.0169493	0.101982	-3.5094
Q64430	1.51266	14.8407	2.65115	0.0169497	0.101982	-3.50942
Q9JHJ3	0.891755	16.2101	2.65092	0.0169577	0.101982	-3.50986
Q5I2A0	3.03012	14.7041	2.65038	0.0169769	0.101996	-3.51092
P62192	0.725825	18.0223	2.64968	0.0170015	0.102043	-3.51226
P50608	-1.24781	17.1166	-2.64845	0.0170446	0.1022	-3.51461
Q8K012	3.74205	9.6931	2.64607	0.0171289	0.102499	-3.5192
P42208	0.631655	19.1307	2.64568	0.0171427	0.102499	-3.51994
Q8BH47	1.88134	13.8658	2.64561	0.0171453	0.102499	-3.52008
Q9D787	2.42234	11.0864	2.64494	0.017169	0.10254	-3.52137
Q8CJ91	2.86712	12.4105	2.64441	0.0171878	0.102551	-3.52238
P55937	0.712474	14.9341	2.64389	0.0172062	0.102559	-3.52338
Q0P678	3.0831	13.4818	2.64314	0.017233	0.102618	-3.52482
Q80VJ2	1.88417	15.5152	2.64144	0.0172937	0.102791	-3.52809
Q9JJA2	1.98405	14.1952	2.64137	0.017296	0.102791	-3.52821
Q9Z2C5	1.5381	14.3576	2.64015	0.0173398	0.102943	-3.53056
Q8BKX1	0.824817	15.1973	2.63951	0.0173628	0.102943	-3.53179
O35448	1.60266	15.3417	2.63923	0.0173727	0.102943	-3.53232
Q9DBV4	4.16248	13.516	2.63715	0.0174477	0.103286	-3.53632
Q4VAA2	0.674674	17.7409	2.63637	0.017476	0.103353	-3.53782
Q91YI1	3.6888	12.0788	2.63317	0.0175919	0.103722	-3.54396
Q9WUZ9	1.59381	14.7951	2.63268	0.0176096	0.103722	-3.54489
P29416	0.801706	17.3797	2.63224	0.0176256	0.103722	-3.54574
Q60963	3.70761	12.7308	2.63176	0.017643	0.103722	-3.54665
P47962	0.642518	19.6458	2.63176	0.0176432	0.103722	-3.54666
Q9D958	2.75037	13.2538	2.63122	0.0176626	0.103722	-3.54768
Q61207	1.60576	20.3595	2.63119	0.0176639	0.103722	-3.54775
P34902	2.37353	11.3601	2.63087	0.0176755	0.103722	-3.54836
Q9Z1D1	0.628844	18.9003	2.62934	0.0177313	0.103948	-3.55128
Q6Q477	-0.909312	19.0532	-2.62833	0.0177683	0.104064	-3.55322
P70245	0.659644	18.2905	2.62747	0.0178	0.104149	-3.55487
Q91ZF0	1.96565	16.843	2.62674	0.0178267	0.104205	-3.55626
P15307	2.90853	10.7084	2.62571	0.0178649	0.104327	-3.55825
Q8BVY0	0.863302	13.8379	2.62516	0.0178853	0.104345	-3.55931
Q921X9	2.30075	14.285	2.62362	0.0179421	0.104482	-3.56225
P40336	0.608054	19.3514	2.62359	0.0179433	0.104482	-3.56231
P32233	0.698849	16.1793	2.6213	0.0180283	0.104876	-3.5667
Q9QUM9	0.601623	19.6764	2.62038	0.0180624	0.104974	-3.56845
P04925	1.69543	15.2836	2.61809	0.0181481	0.105278	-3.57284
Q3U6U5	2.95504	9.69853	2.61793	0.018154	0.105278	-3.57314
Q9Z266	1.96894	14.2725	2.61758	0.018167	0.105278	-3.5738
Q9JKS4	0.807555	14.7402	2.61695	0.0181907	0.105315	-3.57501
Q8K2Q0	0.791616	15.5317	2.61618	0.0182195	0.105379	-3.57648
Q8K0D2	2.61136	17.1387	2.61561	0.0182411	0.105379	-3.57758
Q9D7X8	2.24368	14.746	2.61465	0.0182773	0.105379	-3.57942
P04104	-0.983191	17.6379	-2.61393	0.0183042	0.105379	-3.58078
P25446	5.40141	12.0297	2.61392	0.0183049	0.105379	-3.58081
Q9D7S9	2.06058	14.7347	2.61388	0.0183063	0.105379	-3.58089
Q9QUJ7	1.8174	15.1875	2.61292	0.0183426	0.105421	-3.58272
Q9CQC7	-0.854038	17.0212	-2.61247	0.0183594	0.105421	-3.58357
Q99KN2	2.1083	14.4083	2.6123	0.018366	0.105421	-3.5839
P70362	0.528283	18.3053	2.61063	0.0184294	0.105685	-3.5871
Q924D0	2.70981	14.4714	2.60769	0.0185412	0.106129	-3.59271
Q9QUN3	3.20603	13.5702	2.60768	0.0185419	0.106129	-3.59274
Q8CES0	3.0115	13.8812	2.60582	0.018613	0.106372	-3.59628
Q9DB50	3.926	10.991	2.60565	0.0186194	0.106372	-3.59661
Q8VC03	0.763516	15.0902	2.60374	0.018693	0.106691	-3.60026
Q9CY58	0.573709	17.7584	2.6011	0.0187948	0.107171	-3.60529
Q9DC61	0.609825	17.7876	2.60045	0.0188198	0.107213	-3.60652
P53657	-1.11262	15.9612	-2.59978	0.018846	0.107261	-3.60781
Q91X21	1.72181	13.9008	2.59739	0.0189387	0.107673	-3.61236
O88653	1.75331	15.1249	2.59682	0.0189612	0.107673	-3.61346
Q63844	0.725314	19.2831	2.59616	0.0189869	0.107673	-3.61471
Q06138	0.793567	15.1811	2.59609	0.0189897	0.107673	-3.61484
Q9D273	0.965328	16.2407	2.59522	0.0190235	0.107764	-3.61649
Q6ZPY7	2.93957	11.4063	2.59456	0.0190494	0.10781	-3.61775
Q3U492	3.59658	15.1472	2.59376	0.0190807	0.107886	-3.61927
Q8VE47	0.593089	16.6345	2.59301	0.0191105	0.107954	-3.62072
P62748	0.969184	16.8396	2.59208	0.019147	0.108059	-3.62248
Q99MR8	-0.611013	19.5277	-2.59152	0.0191691	0.108083	-3.62355
Q8CI04	1.38112	14.8549	2.59025	0.0192191	0.108264	-3.62596
Q62419	1.1973	17.281	2.58965	0.0192429	0.108297	-3.62711
Q9JII6	0.721103	19.6405	2.58689	0.0193525	0.108813	-3.63237
Q99KR8	3.19255	12.8446	2.58553	0.0194068	0.109017	-3.63496
Q8K124	1.24229	17.0883	2.58417	0.0194612	0.109221	-3.63755
Q6PER3	1.92467	15.4856	2.58099	0.0195888	0.109746	-3.6436
Q80XI3	0.850319	15.7259	2.5805	0.0196083	0.109746	-3.64452
P70318	1.12145	15.2727	2.58009	0.0196248	0.109746	-3.6453
Q91VW3	1.70015	17.9899	2.57995	0.0196306	0.109746	-3.64557
Q7TSJ2	3.88225	13.5884	2.57958	0.0196454	0.109746	-3.64627
Q3UH60	2.3555	13.9657	2.57731	0.0197373	0.110157	-3.65058
P51863	0.842792	18.1588	2.57549	0.0198115	0.110377	-3.65406
Q9JI75	0.563583	17.4346	2.57541	0.0198146	0.110377	-3.6542
Q9D7E3	2.61293	12.0906	2.575	0.0198314	0.110377	-3.65498
Q8BH69	0.698659	16.3134	2.57394	0.0198744	0.110495	-3.65699
Q9CY18	2.39943	14.4005	2.57358	0.0198891	0.110495	-3.65767
Q9DBC7	1.06348	16.2891	2.57123	0.0199853	0.110894	-3.66213
Q71FD7	1.67453	14.4034	2.57094	0.0199975	0.110894	-3.6627
A2RSJ4	1.88613	13.6464	2.56897	0.0200786	0.110925	-3.66644
Q9EST5	0.817424	18.845	2.56893	0.0200801	0.110925	-3.66651
Q91VU0	2.01769	14.9852	2.56891	0.0200809	0.110925	-3.66655
Q8BZT9	3.09188	11.2611	2.56883	0.0200841	0.110925	-3.66669
Q9D2Y4	1.46975	16.1253	2.56857	0.0200949	0.110925	-3.66719
O55106	0.497755	17.1533	2.56808	0.020115	0.110935	-3.66811
Q8BPN8	2.48195	13.0596	2.56583	0.0202081	0.111347	-3.67238
P70288	0.861328	15.0759	2.5645	0.0202635	0.111511	-3.67491
Q5FWK3	0.751327	19.717	2.56423	0.0202748	0.111511	-3.67543
Q922R8	0.681139	21.3829	2.56219	0.0203599	0.111878	-3.6793
Q91VD9	-0.540488	20.6588	-2.56027	0.0204401	0.112216	-3.68293
Q8BTM8	0.783799	21.6234	2.55615	0.0206134	0.113065	-3.69073
Q64311	2.10171	14.9198	2.55526	0.0206511	0.113103	-3.69242
Q3UE37	2.11431	16.7489	2.55467	0.0206761	0.113103	-3.69354
Q9D2V7	0.8639	17.0484	2.55466	0.0206764	0.113103	-3.69355
P49138	2.61425	14.3101	2.55064	0.0208475	0.113929	-3.70116
Q8K1E0	0.934971	15.4548	2.55021	0.0208659	0.113929	-3.70198
O88447	0.598108	16.2136	2.54979	0.0208839	0.113929	-3.70277
P20934	2.80186	10.7033	2.54726	0.0209923	0.114418	-3.70756
Q61576	1.27657	15.794	2.54653	0.0210238	0.114486	-3.70894
P47750	-1.92272	14.8782	-2.54586	0.0210527	0.11454	-3.71021
Q5SWD9	3.27291	11.1716	2.54292	0.0211798	0.115024	-3.71576
Q64516	2.73503	15.1881	2.5427	0.0211896	0.115024	-3.71619
Q8VDF3	-1.6703	8.52353	-2.54249	0.0211986	0.115024	-3.71658
P42567	0.548259	17.8268	2.54071	0.0212761	0.115341	-3.71995
P47911	0.856467	20.6569	2.53939	0.0213335	0.115379	-3.72244
Q7TT23	2.23452	12.8201	2.53938	0.021334	0.115379	-3.72246
Q9CWQ0	2.66879	12.0232	2.53923	0.0213403	0.115379	-3.72273
Q9CR64	0.754397	17.9172	2.5372	0.0214295	0.1156	-3.72658
P59325	0.507655	18.2895	2.53713	0.0214323	0.1156	-3.7267
Q9QZD9	0.604116	17.9642	2.5364	0.0214647	0.1156	-3.72809
Q61210	0.894838	16.0841	2.53612	0.0214768	0.1156	-3.72861
Q8BUR4	0.601241	16.4463	2.53571	0.0214949	0.1156	-3.72939
Q3TDN2	0.480993	17.1153	2.53569	0.0214959	0.1156	-3.72943
Q9D0F9	-0.458744	21.6432	-2.53354	0.0215906	0.116006	-3.73349
Q61136	2.6074	11.8161	2.53278	0.021624	0.116083	-3.73491
P17918	1.27122	16.5955	2.53204	0.0216568	0.116144	-3.73631
Q9CR60	0.672617	17.5454	2.53166	0.0216738	0.116144	-3.73704
P07934	-2.27421	11.2446	-2.52975	0.0217584	0.116443	-3.74063
Q5F2E8	0.838613	15.6614	2.52953	0.0217681	0.116443	-3.74104
Q5HZI9	0.935664	16.1134	2.52832	0.021822	0.116455	-3.74332
O88448	2.60239	16.1935	2.52775	0.0218475	0.116455	-3.7444
Q9Z0M5	3.13918	15.8699	2.52775	0.0218478	0.116455	-3.74441
Q3THK3	2.82434	12.4527	2.52694	0.0218839	0.116455	-3.74593
O35215	-0.608011	19.6325	-2.52679	0.0218903	0.116455	-3.7462
Q8BWY3	0.720365	18.7124	2.52676	0.021892	0.116455	-3.74627
O88958	0.914136	16.9478	2.52604	0.0219239	0.116455	-3.74762
Q8VE96	2.24692	14.5857	2.52604	0.0219243	0.116455	-3.74763
Q11136	0.932498	19.3894	2.52546	0.0219501	0.116489	-3.74872
Q9Z2G9	0.795184	16.2292	2.52406	0.0220128	0.11672	-3.75135
P70122	0.590795	17.7537	2.52352	0.0220373	0.116747	-3.75237
Q6A4J8	0.803439	15.8282	2.52295	0.0220629	0.116756	-3.75344
P28867	1.22547	15.7589	2.52239	0.0220881	0.116756	-3.7545
P61255	0.993776	18.2975	2.5222	0.0220968	0.116756	-3.75486
Q69ZJ7	0.964712	13.426	2.52088	0.0221567	0.116938	-3.75735
Q6PIP5	1.57747	14.8024	2.52058	0.0221699	0.116938	-3.7579
O55186	1.9423	13.7184	2.52008	0.0221926	0.116956	-3.75885
Q5RKZ7	-2.53687	12.4074	-2.51791	0.0222913	0.117371	-3.76294
P28667	2.97385	12.5177	2.51749	0.0223102	0.117371	-3.76372
Q60772	-2.14637	15.4689	-2.51679	0.0223421	0.117433	-3.76504
Q8VBZ0	0.783569	15.4356	2.51617	0.0223708	0.117433	-3.76622
Q9JL26	2.53418	14.3935	2.51595	0.0223805	0.117433	-3.76662
Q3UHH8	2.05794	14.3569	2.51519	0.0224153	0.117433	-3.76805
Q9ES00	0.774106	15.613	2.51389	0.0224752	0.117433	-3.77051
P12367	0.587225	14.9685	2.51377	0.0224807	0.117433	-3.77073
P45376	0.538954	21.8044	2.51359	0.0224886	0.117433	-3.77105
O08715	1.9938	13.867	2.51346	0.0224947	0.117433	-3.77131
P49300	0.91737	17.1083	2.51325	0.0225042	0.117433	-3.77169
P34928	1.87781	17.1999	2.513	0.022516	0.117433	-3.77218
Q2EMV9	1.37594	14.7362	2.51118	0.0225997	0.117767	-3.77559
P97351	0.762211	19.2492	2.50927	0.022688	0.118126	-3.77919
Q9CXI5	2.25244	14.67	2.50858	0.0227201	0.118191	-3.78049
Q5SUC9	1.70744	10.6544	2.50657	0.022813	0.118427	-3.78425
Q8BGB7	0.696525	16.5928	2.50635	0.0228237	0.118427	-3.78468
O89104	-2.03562	9.91294	-2.50634	0.0228241	0.118427	-3.78469
Q921Q3	1.93152	11.9183	2.5033	0.0229656	0.119059	-3.79039
P41241	0.797714	16.8918	2.502	0.0230268	0.119171	-3.79283
Q61599	0.747214	19.449	2.50192	0.0230307	0.119171	-3.79299
Q9ERT9	2.6806	14.2361	2.50158	0.0230463	0.119171	-3.79361
P70236	3.04327	14.1658	2.49976	0.0231321	0.119512	-3.79703
Q8K299	-3.12456	18.1595	-2.49875	0.0231797	0.119656	-3.79892
Q6P9Q4	1.05984	15.3963	2.49743	0.0232424	0.119877	-3.80141
P14206	0.611948	21.1598	2.49693	0.023266	0.119897	-3.80235
Q9ERS5	1.6771	14.5713	2.49617	0.023302	0.119976	-3.80377
P51660	0.553772	21.7481	2.49539	0.0233392	0.119976	-3.80524
Q8K400	0.850206	15.3748	2.49535	0.0233409	0.119976	-3.8053
Q6ZWV3	0.78126	18.119	2.49257	0.0234736	0.120505	-3.81052
P16125	-0.719444	19.5642	-2.49236	0.0234836	0.120505	-3.81091
P60060	1.90582	15.5766	2.49109	0.0235445	0.120715	-3.81329
P39749	2.1323	15.7957	2.49038	0.0235785	0.120718	-3.81462
Q8VEA4	-2.74084	14.914	-2.48958	0.0236169	0.120718	-3.81611
Q8BWJ3	-0.559403	15.9352	-2.48946	0.0236225	0.120718	-3.81633
P0C8B4	1.84739	14.6569	2.48942	0.0236248	0.120718	-3.81642
P83741	0.623109	17.3252	2.4882	0.0236833	0.120801	-3.8187
Q9CWF2	0.707465	21.5057	2.48803	0.0236913	0.120801	-3.81901
Q8R127	-0.551168	16.7344	-2.48742	0.0237209	0.120801	-3.82016
Q9JKC8	0.596216	18.03	2.48742	0.023721	0.120801	-3.82016
Q9ER72	0.708932	16.7954	2.48612	0.0237837	0.121013	-3.82259
Q91X51	2.43456	13.8653	2.48573	0.0238026	0.121013	-3.82332
Q91VH2	0.879194	18.1142	2.48117	0.0240247	0.121954	-3.83186
Q9Z1R2	0.531364	18.3824	2.4811	0.024028	0.121954	-3.83198
Q60994	-0.581902	23.1923	-2.48031	0.0240665	0.122047	-3.83345
Q8BH43	0.598596	18.0765	2.47948	0.0241075	0.122153	-3.83502
Q9EQN3	1.72751	15.2462	2.47827	0.0241668	0.122304	-3.83728
Q9DB25	0.741735	17.0775	2.47797	0.0241812	0.122304	-3.83783
P70414	2.8748	11.6048	2.47763	0.024198	0.122304	-3.83846
P0DOV2	0.730736	16.3131	2.47679	0.0242395	0.122412	-3.84004
P52432	3.10203	14.1363	2.47609	0.0242742	0.122485	-3.84135
Q3UHQ6	0.758299	14.9897	2.47158	0.0244975	0.123508	-3.84977
Q3UJB9	0.64729	16.2337	2.47045	0.0245541	0.12369	-3.85189
Q9CZC8	2.66081	13.5643	2.46838	0.0246572	0.124106	-3.85573
Q9D8E6	0.582353	18.6416	2.46735	0.024709	0.124264	-3.85766
P16675	0.992466	16.464	2.4669	0.0247313	0.124273	-3.85849
P17156	0.535017	22.2562	2.4662	0.0247668	0.124308	-3.85981
O09159	0.792827	17.6497	2.46595	0.0247795	0.124308	-3.86028
Q9R045	2.66844	10.9619	2.46547	0.0248033	0.124325	-3.86116
Q91ZN5	2.26738	14.8935	2.46348	0.0249037	0.124342	-3.86487
P04441	1.80839	15.4099	2.46427	0.0248642	0.124342	-3.86341
P83917	2.63426	10.8422	2.46413	0.0248709	0.124342	-3.86366
Q8BFY9	0.499578	16.6481	2.46393	0.0248812	0.124342	-3.86404
Q8VEH6	1.80513	14.9779	2.46337	0.0249095	0.124342	-3.86508
P52430	0.642784	18.1849	2.4628	0.0249381	0.124382	-3.86613
P97311	2.59797	14.5212	2.46079	0.0250402	0.124789	-3.86989
P42925	-2.68334	14.3477	-2.4574	0.0252131	0.125435	-3.8762
Q9JJT9	2.58081	10.8343	2.45717	0.0252248	0.125435	-3.87663
O09111	-0.632427	17.8083	-2.4569	0.0252384	0.125435	-3.87712
Q8C8U0	0.581155	15.9523	2.45662	0.0252528	0.125435	-3.87765
Q8R105	2.40304	12.9627	2.45585	0.0252923	0.125528	-3.87908
Q9Z1P6	-0.931286	15.9818	-2.45406	0.0253846	0.125882	-3.88242
Q8CEC6	2.5367	11.7885	2.45247	0.0254665	0.126131	-3.88538
Q922F4	0.825053	18.3542	2.45228	0.0254764	0.126131	-3.88573
O35350	0.568349	18.6017	2.45046	0.0255702	0.126492	-3.8891
Q62178	2.97336	10.8477	2.44868	0.0256629	0.126847	-3.89242
Q9EPJ9	1.47135	15.3523	2.44725	0.0257373	0.127111	-3.89508
Q9EPW0	2.65799	12.0636	2.44474	0.0258685	0.127654	-3.89974
O08585	0.812403	20.2867	2.44402	0.0259061	0.127708	-3.90107
Q91V12	0.82434	18.3158	2.44345	0.025936	0.127708	-3.90213
O88520	2.71292	12.5938	2.44333	0.0259426	0.127708	-3.90236
Q9EPL9	0.671996	17.6894	2.4426	0.0259807	0.127791	-3.90371
O08911	2.54719	12.9908	2.4402	0.0261075	0.128262	-3.90817
Q640N3	1.89594	14.8104	2.43998	0.0261189	0.128262	-3.90857
Q9DC29	0.745833	14.9931	2.43776	0.0262365	0.128703	-3.91269
P49586	0.820106	16.5172	2.43721	0.026266	0.128703	-3.91372
P14685	0.552371	17.3332	2.43709	0.0262723	0.128703	-3.91394
Q8R1K4	-3.09797	12.9931	-2.43529	0.0263682	0.129068	-3.91728
Q9WTX8	2.54533	12.2793	2.43177	0.0265563	0.129883	-3.92379
Q8BVU0	2.67527	12.2901	2.43037	0.0266316	0.130146	-3.92638
Q60710	0.734487	19.1784	2.42958	0.0266743	0.130185	-3.92785
Q791V5	-0.505783	19.2731	-2.42925	0.0266925	0.130185	-3.92847
Q6P1G0	0.884707	13.5937	2.42903	0.026704	0.130185	-3.92887
O35166	1.5352	14.731	2.42745	0.0267894	0.130496	-3.93179
O35604	1.76728	15.8984	2.42562	0.0268886	0.130788	-3.93518
Q8C1Y8	1.98769	15.1894	2.425	0.0269223	0.130788	-3.93632
P27808	3.16165	11.2406	2.42496	0.0269245	0.130788	-3.9364
Q60855	0.820039	15.7762	2.42476	0.0269358	0.130788	-3.93678
Q921V5	1.74006	15.7383	2.42406	0.0269738	0.130867	-3.93807
P01867	0.768384	20.153	2.42366	0.0269955	0.130867	-3.93881
Q9CWU6	2.45355	13.3898	2.42273	0.0270465	0.13101	-3.94054
Q8CFX1	-0.508124	20.6127	-2.42226	0.0270718	0.131028	-3.94139
Q3UN02	1.68063	15.2758	2.42113	0.0271341	0.131224	-3.9435
Q641K1	2.0117	10.4493	2.4207	0.0271577	0.131233	-3.94429
Q7TSI3	0.964865	14.1434	2.41912	0.0272442	0.131546	-3.9472
Q9JJX6	1.0954	17.7679	2.41856	0.0272753	0.131591	-3.94825
Q9CY27	0.673456	20.3537	2.4181	0.0273003	0.131607	-3.94909
Q9CRA4	2.65722	13.0251	2.41741	0.0273387	0.131687	-3.95037
P25976	2.90618	12.7945	2.41688	0.0273675	0.131721	-3.95134
P70180	0.611673	17.7752	2.41638	0.0273956	0.131752	-3.95227
O70251	0.604515	19.4677	2.41588	0.0274229	0.131764	-3.95319
D3Z6Q9	2.31929	14.327	2.4152	0.027461	0.131764	-3.95445
Q9Z0L0	2.42885	10.5999	2.41503	0.0274701	0.131764	-3.95476
P67984	0.664867	19.5818	2.41476	0.0274853	0.131764	-3.95526
Q8BYW1	3.21672	15.8365	2.4125	0.0276107	0.13226	-3.95943
Q8R1B4	0.557601	19.1211	2.41139	0.0276725	0.132451	-3.96147
Q9D6Z1	0.7423	15.1301	2.41085	0.0277031	0.132493	-3.96249
P56542	4.20895	12.6687	2.40894	0.02781	0.132781	-3.96601
Q6ZPY2	3.26656	10.9318	2.40858	0.0278299	0.132781	-3.96666
P62774	0.816181	15.2111	2.40843	0.0278386	0.132781	-3.96695
Q8CIV2	2.18051	12.8923	2.40771	0.0278787	0.132781	-3.96826
Q9CX00	0.725755	16.0428	2.40768	0.0278803	0.132781	-3.96831
A2AKG8	0.566847	14.366	2.40742	0.027895	0.132781	-3.9688
Q7TPR4	0.672902	21.8753	2.40692	0.0279231	0.13281	-3.96972
Q9EPK6	1.00121	14.3528	2.40521	0.0280197	0.133165	-3.97288
Q91W50	0.515208	17.0513	2.40461	0.0280539	0.133223	-3.97399
P61222	0.760381	18.1528	2.4034	0.0281224	0.133367	-3.97622
Q9CQE5	2.5457	12.8666	2.40329	0.0281283	0.133367	-3.97641
Q8R3H7	2.65948	13.8632	2.40207	0.0281976	0.133573	-3.97866
Q9D7B6	-0.48434	17.6848	-2.40159	0.0282249	0.133573	-3.97955
Q8C6G8	0.652565	15.8578	2.40136	0.0282379	0.133573	-3.97997
Q9JKN6	2.86658	10.2275	2.40026	0.0283006	0.133692	-3.98199
Q922Q1	-0.663153	20.4357	-2.40014	0.0283074	0.133692	-3.98221
Q8K382	2.64682	13.0086	2.39596	0.0285468	0.134718	-3.98991
Q9JM76	1.0557	19.3773	2.39493	0.0286062	0.134887	-3.99181
O54774	0.558317	17.0549	2.39437	0.0286382	0.134887	-3.99283
Q8K0D5	0.568092	16.5295	2.39418	0.0286496	0.134887	-3.99319
Q6A065	0.493533	15.0535	2.39349	0.0286891	0.134924	-3.99445
Q6PAJ1	1.95847	14.5865	2.39327	0.0287019	0.134924	-3.99486
O09117	-1.44008	19.4357	-2.39198	0.0287768	0.135171	-3.99724
Q03147	2.61184	13.0063	2.39131	0.0288154	0.135247	-3.99846
Q9JMG1	2.19161	14.4451	2.39042	0.028867	0.135384	-4.0001
P22366	0.995648	15.5099	2.38823	0.0289944	0.135713	-4.00412
P62281	0.769788	18.881	2.38813	0.0290005	0.135713	-4.00431
Q921J2	0.549276	17.5524	2.38788	0.0290149	0.135713	-4.00476
Q08024	2.84944	13.9314	2.38766	0.0290279	0.135713	-4.00517
O08601	-1.03896	15.1728	-2.38729	0.0290493	0.135713	-4.00584
Q5XJY5	0.501645	18.6171	2.38607	0.0291207	0.135898	-4.00808
P97789	2.74134	13.6135	2.38567	0.0291444	0.135898	-4.00883
Q60759	-0.606657	18.1225	-2.38542	0.029159	0.135898	-4.00929
Q8C407	0.697336	16.7592	2.38504	0.0291812	0.135898	-4.00998
P04370	3.21472	12.2772	2.3846	0.0292071	0.135898	-4.01079
Q9QZB9	0.598306	16.2608	2.38432	0.0292237	0.135898	-4.01131
Q9JI90	0.554962	15.7245	2.38324	0.0292869	0.136087	-4.01328
Q9JHP7	2.57524	10.5099	2.38126	0.0294037	0.136302	-4.01691
P46737	0.645851	14.3919	2.38113	0.0294114	0.136302	-4.01715
Q8QZS1	-0.464957	19.347	-2.38108	0.0294144	0.136302	-4.01724
O88986	-2.03173	14.9237	-2.38093	0.0294231	0.136302	-4.01751
P17426	0.508906	18.6882	2.37956	0.0295045	0.136574	-4.02003
O09005	1.44331	14.984	2.37862	0.0295604	0.136721	-4.02176
Q8BLV3	2.91403	10.8823	2.37816	0.0295874	0.136721	-4.02259
F8VPU2	-0.900561	15.0659	-2.37788	0.029604	0.136721	-4.02311
Q8CIM7	-3.06722	13.074	-2.37706	0.029653	0.136843	-4.02461
Q8R4K2	1.01865	15.8131	2.37628	0.0296994	0.136875	-4.02604
Q78IS1	0.60561	16.3779	2.37618	0.0297054	0.136875	-4.02622
P62242	0.73139	19.3058	2.37517	0.0297656	0.137049	-4.02807
Q91YR1	0.665502	18.7834	2.37443	0.0298102	0.137081	-4.02944
P12791	-2.56551	12.0854	-2.37425	0.029821	0.137081	-4.02977
Q8VD66	0.702848	16.7642	2.37379	0.0298484	0.137081	-4.03061
P59279	2.03599	13.1963	2.37259	0.0299205	0.137081	-4.03281
Q9CWZ3	2.2309	16.0778	2.37256	0.0299224	0.137081	-4.03286
P50637	-1.31762	18.1447	-2.37254	0.0299234	0.137081	-4.03289
Q8BHB9	-2.16681	12.3629	-2.37241	0.0299313	0.137081	-4.03313
O70400	0.512672	19.1731	2.37105	0.030013	0.137351	-4.03562
Q149L6	2.56881	17.3999	2.37041	0.030052	0.137426	-4.0368
Q570Y9	0.577163	16.5758	2.36935	0.0301157	0.137555	-4.03873
Q8K0D7	0.743663	15.5503	2.36919	0.0301257	0.137555	-4.03904
Q9JM99	2.0285	10.6576	2.3684	0.030173	0.137666	-4.04047
Q6PGC1	0.545355	15.2589	2.36803	0.0301954	0.137666	-4.04114
Q91YN5	0.588464	17.2515	2.36582	0.0303299	0.138017	-4.04519
Q8BYK6	1.81781	15.5156	2.36534	0.0303593	0.138017	-4.04608
Q8C878	0.5465	16.1992	2.36529	0.0303623	0.138017	-4.04617
Q9WV70	2.6805	10.2956	2.36525	0.0303645	0.138017	-4.04624
Q6Y685	0.511496	17.0874	2.36431	0.0304219	0.138017	-4.04796
P14131	0.61618	19.4831	2.36409	0.0304356	0.138017	-4.04837
Q8R121	0.656384	15.3972	2.36408	0.0304357	0.138017	-4.04837
O54988	0.725305	15.3814	2.36377	0.030455	0.138017	-4.04895
Q8BSM7	-3.09677	13.2977	-2.36239	0.0305393	0.138221	-4.05147
Q9Z0P5	0.894701	16.3023	2.36208	0.0305582	0.138221	-4.05203
Q921I9	1.51733	14.5628	2.36191	0.0305685	0.138221	-4.05234
O35345	0.527257	16.7551	2.36054	0.0306524	0.138497	-4.05483
Q80U93	0.571565	15.4223	2.35804	0.0308068	0.138994	-4.05941
Q9DBE0	-0.550852	20.3919	-2.35801	0.0308084	0.138994	-4.05946
Q9CZN7	0.722909	17.3565	2.35709	0.0308656	0.139148	-4.06115
G5E870	0.584942	16.0133	2.35598	0.0309343	0.139354	-4.06317
Q640N1	1.04197	16.8119	2.3549	0.0310011	0.139551	-4.06514
Q9CQ54	-0.796797	17.8993	-2.35383	0.0310677	0.139747	-4.06709
Q9DBL2	0.550198	14.9347	2.35264	0.0311419	0.139976	-4.06926
O08808	0.87056	15.6907	2.35221	0.0311684	0.139992	-4.07004
P68510	0.836253	19.1144	2.3507	0.031263	0.140191	-4.0728
P31230	0.717027	16.5986	2.35039	0.0312822	0.140191	-4.07336
Q8BU30	0.648613	18.4096	2.35003	0.0313052	0.140191	-4.07403
Q8VCM3	1.75483	14.2773	2.35002	0.0313056	0.140191	-4.07404
Q9CWS4	1.79222	14.9093	2.34881	0.0313818	0.140429	-4.07625
Q9CQU3	0.602022	16.0705	2.34839	0.0314081	0.140443	-4.07701
P63082	3.27218	13.1899	2.34765	0.0314543	0.140546	-4.07835
Q61655	0.818146	16.3524	2.34674	0.0315117	0.14066	-4.08001
Q6A0D4	1.91308	14.0194	2.34651	0.0315264	0.14066	-4.08043
P48025	1.0888	15.7358	2.34575	0.0315743	0.14077	-4.08182
Q9JJR8	3.07162	13.2794	2.34471	0.0316401	0.140959	-4.08371
Q6P5D8	0.673742	15.1768	2.34384	0.031695	0.1411	-4.08529
O08547	0.727223	18.3104	2.34213	0.0318037	0.14148	-4.0884
Q99KC8	0.676451	20.3583	2.34027	0.0319226	0.141904	-4.0918
P62900	0.58835	18.7364	2.33848	0.0320368	0.142206	-4.09504
Q8R4Y4	0.931071	14.8971	2.33847	0.0320375	0.142206	-4.09506
Q9CZ30	0.583627	19.5741	2.33803	0.0320654	0.142226	-4.09586
Q9ERF3	0.607966	16.3353	2.33699	0.0321327	0.142402	-4.09776
Q9Z0R4	0.759287	15.6133	2.33668	0.0321522	0.142402	-4.09831
Q8CDJ8	2.95233	11.1639	2.33612	0.0321882	0.142457	-4.09933
O88522	1.6873	13.9991	2.3337	0.0323444	0.142936	-4.10373
O89086	0.779456	18.2153	2.33366	0.0323468	0.142936	-4.1038
P48774	-1.14887	17.8524	-2.33335	0.0323673	0.142936	-4.10438
O70252	0.727846	16.3781	2.33254	0.0324192	0.142984	-4.10583
Q61768	0.563316	17.0263	2.33245	0.0324254	0.142984	-4.10601
Q80V86	-2.05111	15.3963	-2.33182	0.0324663	0.14306	-4.10715
Q91XU3	0.864403	15.3294	2.33075	0.0325357	0.143261	-4.1091
Q78JW9	2.7114	15.0939	2.32878	0.0326638	0.143687	-4.11267
Q8CB96	2.69762	12.0567	2.32853	0.0326799	0.143687	-4.11311
Q64674	0.500625	19.563	2.3275	0.0327475	0.143777	-4.11499
Q8BNU0	3.72016	12.1127	2.32749	0.032748	0.143777	-4.115
Q9CQ71	2.52347	13.2096	2.32613	0.0328372	0.143951	-4.11748
Q8CI71	1.25766	13.8847	2.32589	0.0328528	0.143951	-4.11791
Q9R190	0.684188	15.9853	2.3258	0.032859	0.143951	-4.11808
P35802	-0.994805	16.1289	-2.32495	0.0329145	0.14409	-4.11961
Q9JIH2	3.3637	14.6971	2.32346	0.0330125	0.144415	-4.12231
Q9CPW4	0.936523	19.7363	2.32175	0.0331253	0.144576	-4.12541
A2A432	0.677552	14.3214	2.32147	0.0331436	0.144576	-4.12591
Q9R0M6	0.60827	16.8925	2.32118	0.0331627	0.144576	-4.12644
Q9D753	1.90215	14.6406	2.32082	0.0331866	0.144576	-4.12709
Q9EPU0	0.443731	17.9479	2.32081	0.0331877	0.144576	-4.12712
Q8CCJ9	-1.63718	17.241	-2.3204	0.0332143	0.144576	-4.12785
P83870	1.7063	15.2271	2.32037	0.0332166	0.144576	-4.12791
Q61555	-1.5244	8.82098	-2.31985	0.0332513	0.144623	-4.12886
Q99MP8	2.08136	11.2432	2.31945	0.0332778	0.144634	-4.12958
Q6P1B1	0.584568	18.0708	2.31872	0.0333261	0.14474	-4.1309
Q9CQT5	2.87701	14.8291	2.31707	0.0334361	0.145114	-4.13389
P63242	0.437691	19.7732	2.31671	0.0334601	0.145114	-4.13454
P08071	3.83739	11.3777	2.31569	0.0335282	0.145237	-4.13639
P61620	0.680439	18.2952	2.31556	0.0335366	0.145237	-4.13662
Q8BYC6	2.24669	14.6008	2.31468	0.0335958	0.14539	-4.13822
Q8K4T3	-1.62492	9.92185	-2.31352	0.033673	0.145619	-4.1403
Q63829	0.615604	17.1491	2.31297	0.0337102	0.145676	-4.1413
Q8VC04	2.52862	11.4677	2.31151	0.0338084	0.145997	-4.14394
P31938	0.684266	17.6052	2.31073	0.0338607	0.146118	-4.14535
Q91VT4	-0.524287	17.9189	-2.3036	0.0343451	0.148103	-4.15823
P46061	0.843596	17.5486	2.30301	0.0343852	0.14817	-4.15929
Q8BTW3	2.09939	14.7788	2.30247	0.0344222	0.148224	-4.16026
P56183	2.60487	11.113	2.29971	0.034612	0.148892	-4.16525
Q9CXW4	0.679289	19.3883	2.2995	0.0346266	0.148892	-4.16563
P47811	0.676159	17.1329	2.29747	0.034766	0.149385	-4.16927
P63101	0.59833	21.0373	2.29657	0.0348288	0.149549	-4.17091
P21180	-1.49315	15.562	-2.29496	0.03494	0.149816	-4.1738
Q9D1A2	0.907121	21.3509	2.29445	0.0349757	0.149816	-4.17473
Q9JL35	1.53012	15.0158	2.29435	0.0349825	0.149816	-4.1749
P14869	0.45819	19.0827	2.29424	0.03499	0.149816	-4.1751
P63276	0.704168	16.0979	2.29349	0.0350422	0.149933	-4.17645
Q9D906	0.632478	16.6219	2.29229	0.0351262	0.150186	-4.17862
Q9CQ79	0.660219	17.1961	2.2917	0.035167	0.150224	-4.17967
Q8K2U2	2.45762	14.4167	2.29145	0.0351847	0.150224	-4.18012
Q60598	0.524726	18.7715	2.28996	0.035289	0.150438	-4.1828
B2RY04	1.67626	13.5426	2.28988	0.0352949	0.150438	-4.18296
P19536	-0.472756	18.024	-2.28967	0.0353095	0.150438	-4.18333
Q9Z0W3	0.823699	14.9633	2.2884	0.0353987	0.150658	-4.18562
Q9Z0J0	0.817761	20.4848	2.28741	0.0354684	0.150658	-4.1874
P62821	0.522121	20.4864	2.28722	0.035482	0.150658	-4.18774
Q01065	2.41953	14.07	2.28677	0.035513	0.150658	-4.18854
Q9CQ22	0.662266	16.865	2.28662	0.0355236	0.150658	-4.18881
Q3TBT3	0.908251	15.2445	2.28613	0.0355583	0.150658	-4.18969
C8YR32	0.633563	22.4276	2.28599	0.0355682	0.150658	-4.18994
Q99LC3	-0.583462	18.0994	-2.28523	0.0356221	0.150658	-4.19131
P61965	3.66837	10.6478	2.28492	0.035644	0.150658	-4.19187
Q91Z96	2.43386	13.3198	2.28487	0.0356472	0.150658	-4.19195
Q61205	1.28825	15.549	2.28472	0.0356579	0.150658	-4.19222
Q9R1P1	0.769206	18.6436	2.2847	0.0356599	0.150658	-4.19227
B2RSH2	-0.604423	18.8685	-2.28319	0.0357662	0.151002	-4.19497
P97470	0.855041	14.5903	2.2818	0.0358657	0.151303	-4.19748
P08030	1.20858	17.8213	2.28149	0.0358876	0.151303	-4.19804
Q91WK5	0.965259	16.7266	2.28072	0.0359426	0.151429	-4.19942
Q8BU27	1.43389	13.7509	2.27998	0.0359954	0.151456	-4.20075
P63325	0.501901	17.6701	2.27993	0.0359988	0.151456	-4.20084
Q9Z1Z2	0.556102	16.2761	2.27855	0.0360974	0.151596	-4.20331
Q8BK63	0.588674	15.9229	2.27845	0.0361045	0.151596	-4.20349
Q8CGB3	1.73004	13.3354	2.27841	0.0361073	0.151596	-4.20356
Q8CAS9	0.651083	16.5896	2.27753	0.0361704	0.151724	-4.20514
P0CG14	1.65637	16.0985	2.27728	0.0361881	0.151724	-4.20558
Q8CFI0	0.519473	19.1401	2.27586	0.0362904	0.152039	-4.20814
Q99K23	0.467256	16.6172	2.27554	0.0363136	0.152039	-4.20871
Q5EBG8	2.59614	11.7032	2.275	0.0363524	0.152097	-4.20968
P53564	2.38312	12.8446	2.27448	0.0363895	0.152147	-4.2106
Q9ES74	0.463918	16.9716	2.27375	0.0364425	0.152263	-4.21192
P10404	0.869956	14.3673	2.27284	0.0365082	0.152352	-4.21355
Q9D7S7	3.39358	11.4067	2.27263	0.0365236	0.152352	-4.21393
Q99LX5	2.23042	10.6615	2.27241	0.0365393	0.152352	-4.21432
Q99JX4	0.617027	16.2231	2.27177	0.0365856	0.15244	-4.21546
O35841	0.823493	16.2696	2.27062	0.0366694	0.152662	-4.21753
Q8BH48	0.699151	15.1302	2.27007	0.036709	0.152662	-4.21851
O54834	4.69206	11.0865	2.27	0.0367145	0.152662	-4.21864
Q9DCT8	0.50238	18.6232	2.26842	0.0368293	0.153034	-4.22147
Q08093	0.905413	15.3129	2.2675	0.0368968	0.153172	-4.22312
E9Q555	0.691143	14.6605	2.26727	0.0369131	0.153172	-4.22352
Q8CI75	0.763215	15.2096	2.2666	0.0369622	0.15327	-4.22472
Q62186	0.532927	17.6859	2.2655	0.0370429	0.1535	-4.2267
P50096	0.822714	15.9981	2.26386	0.0371632	0.153893	-4.22963
B1AXH1	4.86228	14.235	2.26037	0.0374208	0.154854	-4.23587
P48024	2.24217	15.3874	2.25969	0.0374708	0.154954	-4.23707
P48962	-0.543924	21.2144	-2.25799	0.0375974	0.155372	-4.24012
Q80Y56	2.59398	13.4808	2.2553	0.0377974	0.156092	-4.24491
Q9D8T7	2.6884	13.8681	2.25412	0.037886	0.156351	-4.24703
Q9JHH9	0.688036	15.7402	2.25295	0.0379739	0.156607	-4.24912
Q91V98	1.05554	15.3168	2.25212	0.0380358	0.156721	-4.25059
P84091	0.578076	19.1878	2.25172	0.0380664	0.156721	-4.25132
P46460	0.62823	19.2296	2.2513	0.038098	0.156721	-4.25207
Q6PNC0	2.32219	13.4656	2.2512	0.0381053	0.156721	-4.25224
P54728	0.476125	19.3889	2.2502	0.0381807	0.156762	-4.25403
Q80VP1	0.548825	16.417	2.25015	0.0381845	0.156762	-4.25411
Q9D5V6	0.474577	16.9992	2.25004	0.0381929	0.156762	-4.25431
Q9ET30	0.664264	17.946	2.2476	0.0383767	0.157406	-4.25865
Q8VC16	0.700944	13.6075	2.24721	0.0384067	0.157406	-4.25935
P03958	1.52536	15.3372	2.2467	0.0384452	0.157406	-4.26026
Q9WVR4	0.528342	17.2309	2.24659	0.0384538	0.157406	-4.26046
Q91Z53	-0.578418	19.4301	-2.24624	0.0384801	0.157407	-4.26107
Q8R1X6	0.881515	14.0258	2.24388	0.0386595	0.158034	-4.26527
Q9QWL7	-0.852399	18.7542	-2.24262	0.038756	0.158321	-4.26752
O55137	-0.778534	18.0913	-2.24113	0.03887	0.15868	-4.27017
Q8CGF1	0.563481	15.9784	2.23823	0.0390932	0.159483	-4.27533
Q924X2	3.8102	11.2945	2.23788	0.0391201	0.159486	-4.27595
Q8C6K9	-2.02609	15.4789	-2.23501	0.0393423	0.160243	-4.28106
Q9R1Q9	0.768337	17.0345	2.23479	0.039359	0.160243	-4.28144
O70293	2.96624	12.8612	2.23378	0.0394375	0.160455	-4.28324
P33434	2.80426	12.2911	2.23204	0.0395727	0.160893	-4.28632
Q9DBX2	2.10015	14.3467	2.23171	0.0395984	0.160893	-4.28691
Q9DBF1	-0.474686	17.0513	-2.22997	0.0397349	0.161286	-4.29001
Q9D8V7	1.9968	13.5281	2.22979	0.0397484	0.161286	-4.29032
P63087	0.546115	18.7431	2.22905	0.0398066	0.161385	-4.29164
Q9EQH3	0.554248	20.5542	2.2288	0.0398261	0.161385	-4.29208
Q7TSG2	1.14643	14.3031	2.22744	0.0399331	0.16171	-4.29449
E9Q1P8	3.33708	12.6764	2.22628	0.0400242	0.161971	-4.29655
Q9CWS0	2.39424	16.9053	2.22576	0.0400653	0.162029	-4.29747
Q8VDG7	1.60182	15.3215	2.2254	0.040094	0.162036	-4.29811
Q8R4H2	0.537382	15.2427	2.22479	0.0401417	0.162121	-4.29919
O35678	0.601989	21.3694	2.22403	0.0402021	0.162149	-4.30054
Q9EP53	2.69321	10.9446	2.22425	0.0401844	0.162149	-4.30014
Q3TXX3	2.49777	11.6885	2.22213	0.0403528	0.162648	-4.30391
Q9QZ06	0.446192	17.1598	2.21984	0.0405343	0.16327	-4.30795
Q62048	0.761717	15.6215	2.21925	0.0405816	0.163352	-4.309
P54116	0.790244	18.0091	2.21753	0.0407187	0.163697	-4.31204
Q6DFW4	1.45719	15.5287	2.2175	0.0407213	0.163697	-4.31209
P97927	-0.716774	19.2363	-2.21648	0.0408031	0.163917	-4.3139
Q8BK67	0.567005	17.2412	2.21582	0.0408565	0.164023	-4.31508
Q9D967	0.614657	17.53	2.21514	0.040911	0.164132	-4.31628
Q922L6	-1.81746	16.7295	-2.21397	0.0410051	0.164325	-4.31834
Q8BH31	0.824385	16.1417	2.21374	0.0410238	0.164325	-4.31875
Q8BVQ5	0.636465	16.2645	2.21353	0.0410404	0.164325	-4.31912
Q8C5L3	0.504586	16.052	2.21224	0.0411443	0.164632	-4.32139
Q8BFY6	0.533704	16.1949	2.21103	0.0412422	0.164914	-4.32353
P70460	0.566667	15.9077	2.20994	0.0413312	0.165018	-4.32547
Q9JHK5	1.91203	15.5738	2.20988	0.0413357	0.165018	-4.32557
Q9CY62	2.14764	14.6723	2.20945	0.0413702	0.165018	-4.32632
Q9JM14	0.744665	16.7912	2.20937	0.0413772	0.165018	-4.32647
Q7TNG8	-1.59449	16.4681	-2.20765	0.0415173	0.165468	-4.32951
Q99KE1	0.717488	15.2919	2.20724	0.0415503	0.16549	-4.33022
Q62394	-1.66079	16.3475	-2.20664	0.0415995	0.165577	-4.33129
P98086	0.64408	17.1408	2.20595	0.041656	0.165595	-4.33251
Q8K190	2.31645	10.5727	2.20571	0.0416752	0.165595	-4.33292
Q9JM51	-1.04163	17.1471	-2.20558	0.0416861	0.165595	-4.33316
Q8VCE2	2.00693	12.7777	2.2048	0.0417498	0.165639	-4.33453
Q9CXJ4	-0.710454	15.4829	-2.20464	0.0417631	0.165639	-4.33482
P49429	-1.7849	15.8927	-2.20425	0.0417949	0.165639	-4.3355
P12388	2.31883	9.51791	2.20411	0.0418068	0.165639	-4.33576
D0QMC3	2.58312	13.0429	2.20236	0.0419499	0.166098	-4.33883
Q91YJ2	0.671692	16.8039	2.20172	0.0420027	0.166198	-4.33996
Q9ES18	2.06856	11.1086	2.20108	0.0420557	0.166299	-4.34109
Q60605	0.632016	20.9968	2.20049	0.0421044	0.166383	-4.34213
Q9D7P6	0.490967	15.339	2.1997	0.0421697	0.166532	-4.34353
P14069	0.971156	19.7314	2.19888	0.042237	0.166689	-4.34496
Q9D4H1	0.6117	16.6083	2.19821	0.0422926	0.166799	-4.34614
P97377	2.21941	12.7269	2.19719	0.0423776	0.167026	-4.34794
O08848	1.7678	14.1109	2.19626	0.0424548	0.167221	-4.34958
Q9D920	1.84395	10.2333	2.19475	0.0425807	0.16731	-4.35224
Q3UMY5	0.612976	15.295	2.19445	0.0426058	0.16731	-4.35277
Q9CVD2	2.5429	14.679	2.19434	0.0426149	0.16731	-4.35296
Q8R2R3	0.6836	13.9703	2.19428	0.0426201	0.16731	-4.35307
P21278	-0.671367	18.6847	-2.19405	0.0426389	0.16731	-4.35347
Q99LP6	0.608839	17.7026	2.19374	0.0426649	0.16731	-4.35401
Q9D0C4	2.40036	13.0711	2.19348	0.0426866	0.16731	-4.35447
P39098	4.02151	10.0439	2.19334	0.0426987	0.16731	-4.35472
O08734	0.824407	16.1119	2.19293	0.042733	0.167336	-4.35544
Q3UTJ2	-1.18418	16.3655	-2.19251	0.042768	0.167365	-4.35618
P09405	0.536111	18.8513	2.19098	0.0428963	0.167703	-4.35887
Q9CQR2	0.584492	19.7604	2.19082	0.0429098	0.167703	-4.35915
Q91Z38	2.59035	14.27	2.1896	0.043012	0.167868	-4.36129
Q03963	2.2051	13.142	2.18935	0.0430335	0.167868	-4.36174
O70566	0.682883	15.9548	2.18902	0.0430608	0.167868	-4.36231
Q9CY50	0.464615	18.025	2.189	0.043063	0.167868	-4.36235
P01660	2.40209	13.0061	2.18771	0.0431714	0.168182	-4.36461
A8Y5H7	0.754503	15.2668	2.18711	0.0432218	0.16827	-4.36566
Q8BZN6	2.23611	14.6243	2.18594	0.0433215	0.16855	-4.36772
P70340	1.8168	15.1558	2.18532	0.0433738	0.168645	-4.36881
Q3UQ28	0.935401	17.5183	2.18469	0.0434272	0.16873	-4.36991
Q8CIH5	0.908701	14.8624	2.18441	0.0434514	0.16873	-4.37041
Q8BML9	0.494293	18.3599	2.18335	0.0435415	0.168971	-4.37227
P97287	2.21945	14.3889	2.1824	0.0436219	0.169111	-4.37392
Q99MN1	0.562967	17.8185	2.18227	0.0436335	0.169111	-4.37416
Q9ERK4	0.572741	18.4259	2.18146	0.0437028	0.169271	-4.37559
Q8K3I9	1.69291	11.7304	2.18066	0.0437713	0.169324	-4.37699
P35278	0.686584	18.8874	2.18064	0.0437723	0.169324	-4.37701
Q91YY4	2.76562	12.7802	2.18005	0.0438234	0.169372	-4.37806
Q8BG81	2.25708	12.9006	2.17959	0.0438624	0.169372	-4.37885
P55194	3.11595	12.4809	2.17952	0.0438686	0.169372	-4.37898
Q05895	2.56673	13.4077	2.17899	0.0439137	0.169396	-4.3799
Q9D7V9	0.607986	16.5095	2.17864	0.0439443	0.169396	-4.38053
P68040	0.513892	20.5405	2.17847	0.0439589	0.169396	-4.38083
O54782	1.68914	16.104	2.17777	0.0440187	0.169518	-4.38205
P20029	0.608614	22.4076	2.17591	0.044179	0.170027	-4.38531
P99026	0.569854	18.6719	2.17547	0.044217	0.170065	-4.38607
Q8BRT1	0.605381	15.7309	2.17324	0.0444101	0.1707	-4.38998
Q8BSE0	3.14588	15.2734	2.17144	0.0445662	0.171107	-4.39313
Q9QY76	0.457897	18.5057	2.17137	0.0445727	0.171107	-4.39326
P13864	2.98506	13.6201	2.1704	0.0446572	0.171323	-4.39495
Q8JZM7	3.3188	13.5924	2.16979	0.0447098	0.171342	-4.39601
Q9QUM0	3.54299	14.3276	2.16932	0.0447513	0.171342	-4.39684
Q9CQV4	0.504819	16.7855	2.16887	0.0447906	0.171342	-4.39763
Q8BK64	0.530556	18.1533	2.16884	0.0447934	0.171342	-4.39768
Q9QZK7	3.09474	10.2532	2.16872	0.0448039	0.171342	-4.39789
Q91UZ5	2.71754	12.4988	2.16674	0.0449767	0.171854	-4.40134
Q6ZWN5	0.5671	20.8147	2.16654	0.0449944	0.171854	-4.40169
Q8VDM6	0.74796	15.2133	2.16507	0.0451237	0.172148	-4.40426
Q7TNV0	0.425941	16.7393	2.16501	0.0451285	0.172148	-4.40436
Q9CQA9	1.67531	14.609	2.16419	0.0452013	0.172218	-4.4058
Q8BIQ5	0.610778	16.2993	2.16416	0.0452036	0.172218	-4.40585
P59235	1.89219	15.4182	2.16326	0.0452828	0.172411	-4.40742
Q3U308	1.67451	13.7077	2.16261	0.0453407	0.172523	-4.40856
Q810D6	1.75121	14.2465	2.16227	0.0453709	0.172529	-4.40916
Q9D1M0	0.515141	17.6636	2.16118	0.0454669	0.172704	-4.41105
Q9JKV5	-2.26519	14.3341	-2.1611	0.0454738	0.172704	-4.41119
O88456	0.548323	19.9494	2.15993	0.0455778	0.172871	-4.41323
Q8BZB2	1.55024	14.6036	2.15989	0.0455816	0.172871	-4.4133
Q9ERI6	0.549038	16.96	2.15964	0.0456036	0.172871	-4.41374
Q62203	2.63798	13.2407	2.15813	0.0457381	0.173272	-4.41637
Q811I0	1.29317	14.7006	2.15756	0.0457886	0.173355	-4.41736
Q9CZL2	0.531525	15.1593	2.15722	0.0458188	0.173361	-4.41795
Q9ER88	1.97146	14.8629	2.15652	0.0458818	0.173479	-4.41918
Q8BYH7	0.559113	17.03	2.15623	0.0459074	0.173479	-4.41968
Q9CW42	0.638809	17.4202	2.15561	0.0459627	0.173532	-4.42076
Q7TPE5	2.12558	11.3887	2.15543	0.0459788	0.173532	-4.42107
P46467	0.692382	18.4237	2.15497	0.0460207	0.173582	-4.42188
P68372	0.474244	23.6808	2.1542	0.0460893	0.173732	-4.42322
Q9D8U8	0.659584	18.3452	2.15338	0.0461627	0.173873	-4.42464
Q9DAU1	2.62611	14.5506	2.15314	0.0461841	0.173873	-4.42506
Q01063	1.34154	10.2368	2.15259	0.0462345	0.173904	-4.42603
Q9D1G2	0.574015	16.5326	2.15242	0.0462498	0.173904	-4.42633
Q5NC05	2.46354	12.4316	2.15138	0.0463431	0.174146	-4.42813
P03888	-0.534632	17.3196	-2.15021	0.0464485	0.174434	-4.43016
Q921H8	0.515651	20.9949	2.14959	0.046505	0.174538	-4.43125
Q8BP47	0.578313	18.8212	2.14871	0.0465839	0.174726	-4.43276
Q99NB8	1.25141	14.9402	2.14773	0.0466734	0.174953	-4.43448
P03899	-0.746647	17.1641	-2.14647	0.0467877	0.175205	-4.43667
Q68FE2	2.08433	11.429	2.14635	0.0467986	0.175205	-4.43687
Q9JLR1	2.01175	16.5241	2.14503	0.046919	0.175547	-4.43917
O09106	0.475246	17.4897	2.14468	0.0469512	0.175559	-4.43978
P61290	0.695751	16.0321	2.14256	0.0471449	0.176174	-4.44346
Q8BUL6	2.21969	13.3688	2.1408	0.0473058	0.176498	-4.44651
Q8BJW5	1.36313	14.4236	2.14055	0.0473287	0.176498	-4.44694
Q3TA59	2.09866	12.6438	2.1403	0.0473523	0.176498	-4.44739
Q8K0H5	1.48492	13.4	2.13993	0.047386	0.176498	-4.44802
A2AQ25	-0.805913	16.5674	-2.13934	0.0474403	0.176498	-4.44904
Q61696	0.502082	22.9556	2.13898	0.0474734	0.176498	-4.44967
P35822	2.53675	17.3322	2.13873	0.0474963	0.176498	-4.4501
P42128	2.69861	10.5872	2.13856	0.0475127	0.176498	-4.45041
P34022	0.751654	16.3047	2.13837	0.0475303	0.176498	-4.45074
Q8C754	0.765485	16.1378	2.13813	0.0475519	0.176498	-4.45114
Q9DCV7	-1.61383	16.3508	-2.13813	0.0475523	0.176498	-4.45115
P19253	0.778139	18.3059	2.13663	0.0476907	0.176903	-4.45375
Q8VE95	-0.549392	16.8625	-2.13624	0.0477266	0.176928	-4.45442
Q3TIR1	3.48661	12.5667	2.13548	0.0477969	0.17708	-4.45573
A2A8U2	-2.57775	12.5162	-2.13271	0.0480549	0.177728	-4.46054
O54786	3.36874	11.1168	2.13261	0.0480641	0.177728	-4.46071
Q99N11	2.08837	11.432	2.13247	0.0480772	0.177728	-4.46095
P01728	1.80504	14.1936	2.13234	0.0480892	0.177728	-4.46118
Q3UHX2	0.614716	16.7733	2.13149	0.0481689	0.177913	-4.46266
P70297	1.81272	14.2179	2.13092	0.048222	0.17792	-4.46364
Q8BNI4	1.79793	15.864	2.13079	0.0482342	0.17792	-4.46387
Q9QY06	2.09927	14.6573	2.13052	0.0482589	0.17792	-4.46432
P34152	0.5475	16.6139	2.12874	0.0484263	0.178361	-4.46741
P70295	1.2117	14.756	2.12843	0.0484557	0.178361	-4.46795
P62889	0.584542	18.7732	2.12831	0.048467	0.178361	-4.46816
Q7TMY7	0.887549	15.727	2.12779	0.0485158	0.178432	-4.46906
Q64152	1.34126	15.0711	2.12669	0.0486189	0.178703	-4.47095
P22892	0.529554	17.8743	2.1259	0.0486937	0.178869	-4.47232
Q6P8U6	2.87831	12.0716	2.12545	0.0487359	0.17888	-4.4731
Q91ZJ5	-0.51288	19.0113	-2.12524	0.048756	0.17888	-4.47347
Q921R8	2.32051	11.359	2.1236	0.0489107	0.179242	-4.47629
Q9DCJ9	0.979063	16.4883	2.12357	0.0489138	0.179242	-4.47635
Q9JI91	0.645329	17.0447	2.12197	0.0490652	0.179673	-4.4791
Q9ESP1	2.48175	13.465	2.12171	0.0490907	0.179673	-4.47957
P47963	0.758033	19.2999	2.12122	0.0491371	0.179734	-4.48041
Q8VDW0	0.998366	15.5935	2.12061	0.0491951	0.179837	-4.48146
Q91X96	1.3995	15.5819	2.11887	0.0493614	0.180214	-4.48447
Q91YE6	0.716436	16.1689	2.11884	0.0493634	0.180214	-4.48451
Q9EP89	1.38487	14.8568	2.1184	0.0494063	0.180214	-4.48528
Q07813	2.17163	15.3017	2.11802	0.049442	0.180214	-4.48593
Q64213	0.712383	16.7622	2.11797	0.049447	0.180214	-4.48602
Q8K010	-0.501218	18.5876	-2.11747	0.0494953	0.180271	-4.48689
Q91YP3	1.86909	14.7585	2.11718	0.0495223	0.180271	-4.48737
Q8R1S4	2.25537	12.199	2.11653	0.0495846	0.180389	-4.48849
P50446	-0.85571	17.2348	-2.11508	0.0497242	0.180785	-4.491
Q921M3	0.492548	17.0494	2.11478	0.0497532	0.180785	-4.49152
Q921H9	2.37084	13.4694	2.11416	0.0498131	0.180894	-4.49259
Q6ZWX6	0.532462	18.7496	2.11365	0.0498623	0.180964	-4.49347
Q9R269	-0.949628	15.1895	-2.11316	0.0499092	0.181025	-4.49431
Q60949	0.591622	14.3507	2.1127	0.0499534	0.181077	-4.4951
Q8R361	0.732631	16.2106	2.1122	0.0500021	0.181094	-4.49596
P97926	1.9292	14.6033	2.11203	0.0500179	0.181094	-4.49625
P08101	1.58608	16.0077	2.11135	0.0500842	0.181226	-4.49742
Q9JKN1	1.4502	15.2831	2.1105	0.0501667	0.181416	-4.49889
P29533	1.80614	14.5083	2.10807	0.0504022	0.181697	-4.50306
Q6NXJ0	2.24673	10.0387	2.1092	0.0502926	0.181697	-4.50112
Q9CQE1	0.749554	16.3785	2.10899	0.050313	0.181697	-4.50149
Q8BSD5	2.92699	9.76542	2.10847	0.0503642	0.181697	-4.50239
Q9DCC7	0.705379	14.6196	2.10822	0.0503881	0.181697	-4.50281
Q8CAY6	-0.452689	18.416	-2.10785	0.0504246	0.181697	-4.50346
Q8BUV3	-0.411722	17.3455	-2.10686	0.0505203	0.181736	-4.50515
Q80UM3	0.663639	16.7519	2.10684	0.050523	0.181736	-4.50519
Q922B1	-0.591237	15.5338	-2.10653	0.0505533	0.181736	-4.50573
P17439	0.614935	16.5158	2.1065	0.0505556	0.181736	-4.50577
Q99JY4	1.83171	10.8578	2.10498	0.0507042	0.182162	-4.50838
Q9CT10	1.43423	14.943	2.10394	0.0508061	0.182343	-4.51017
Q99LV7	1.43501	10.2275	2.10297	0.0509013	0.182343	-4.51183
Q80VQ0	0.573526	19.5576	2.10247	0.0509511	0.182343	-4.5127
Q05CL8	3.20965	11.4294	2.1024	0.0509575	0.182343	-4.51282
Q7TMQ7	1.33456	15.0399	2.10218	0.0509793	0.182343	-4.5132
O35114	0.571657	16.0965	2.10208	0.0509895	0.182343	-4.51338
Q99MV1	0.673305	18.5366	2.10205	0.0509924	0.182343	-4.51343
Q8BLK9	3.11	12.363	2.10192	0.0510043	0.182343	-4.51363
Q63943	2.91622	13.0446	2.10171	0.0510258	0.182343	-4.51401
Q8BH97	1.08222	16.406	2.10112	0.0510834	0.182441	-4.51501
P01844	1.73866	14.0185	2.09897	0.0512962	0.182988	-4.51871
P27773	0.660522	22.3097	2.09859	0.0513336	0.182988	-4.51936
P61211	0.543239	17.3002	2.09857	0.0513354	0.182988	-4.51939
Q9DCT5	2.16272	14.3142	2.09834	0.0513579	0.182988	-4.51978
Q61133	-0.623386	17.6215	-2.09763	0.0514283	0.182988	-4.521
Q91VM3	2.42014	11.1267	2.0976	0.0514319	0.182988	-4.52106
Q8CHQ0	0.476459	15.8876	2.09743	0.0514485	0.182988	-4.52135
P12970	0.6636	17.8828	2.09504	0.0516865	0.183727	-4.52545
Q99NH0	1.30948	14.6258	2.0946	0.0517299	0.183773	-4.5262
O08605	2.10137	11.3278	2.09413	0.0517764	0.183778	-4.527
Q9ES46	1.14395	14.2248	2.09397	0.0517929	0.183778	-4.52728
Q9CQZ5	-0.684332	16.2129	-2.09339	0.0518505	0.183778	-4.52827
P58021	0.539949	16.7189	2.09305	0.051885	0.183778	-4.52886
P63166	0.649912	17.4412	2.09215	0.0519749	0.183778	-4.5304
P11680	1.41004	15.9481	2.09202	0.0519884	0.183778	-4.53063
F6ZDS4	0.496746	16.2299	2.09175	0.0520147	0.183778	-4.53108
Q8CGB6	-0.535437	16.4986	-2.09168	0.052022	0.183778	-4.53121
O70493	0.783006	17.6767	2.09158	0.0520323	0.183778	-4.53138
Q8R0N6	-0.576661	17.3064	-2.09155	0.0520349	0.183778	-4.53143
P83940	0.540081	17.0988	2.08966	0.0522245	0.18431	-4.53466
Q8BL66	0.543967	17.2492	2.08944	0.0522465	0.18431	-4.53503
Q8VDV3	1.93709	13.9392	2.08894	0.0522973	0.184382	-4.5359
P10417	-1.18295	14.0779	-2.088	0.0523923	0.184609	-4.53751
Q8CI59	0.679198	18.2397	2.08757	0.0524354	0.184653	-4.53824
Q08857	-0.548012	23.6002	-2.08576	0.0526184	0.18519	-4.54134
O35075	0.587077	16.3327	2.08513	0.0526824	0.185232	-4.54242
Q80TY0	1.29155	15.5853	2.08504	0.0526917	0.185232	-4.54257
Q3U1Z5	2.66891	11.4669	2.08285	0.0529139	0.1857	-4.54631
Q8BJW6	0.542541	16.906	2.08279	0.0529204	0.1857	-4.54642
Q8K009	0.861576	9.04178	2.08265	0.0529341	0.1857	-4.54665
Q9DBL9	-0.556466	21.6324	-2.08252	0.0529475	0.1857	-4.54687
Q91YL2	-0.912725	15.2329	-2.08181	0.0530202	0.185743	-4.54809
P26443	0.515971	20.4722	2.0818	0.0530211	0.185743	-4.54811
Q8C079	1.74943	15.7796	2.08101	0.0531012	0.185916	-4.54945
P46656	-0.790548	18.1376	-2.08071	0.0531325	0.185918	-4.54997
Q811D0	0.760975	16.1549	2.08029	0.0531752	0.185959	-4.55068
Q99JI6	0.5181	20.2055	2.07759	0.0534514	0.186786	-4.55528
Q99JY0	0.53278	21.8738	2.07714	0.0534984	0.186786	-4.55606
P17427	0.441463	19.6732	2.07708	0.0535043	0.186786	-4.55616
Q8BXK9	0.559458	15.2496	2.07613	0.0536017	0.187019	-4.55778
Q8CAA7	1.70857	14.4074	2.07485	0.0537343	0.187331	-4.55997
Q61595	0.590557	14.7103	2.07464	0.0537553	0.187331	-4.56031
Q8BGR2	1.41115	9.83801	2.07436	0.0537842	0.187331	-4.56079
O54950	1.80823	14.4753	2.07333	0.0538907	0.187487	-4.56255
P28658	0.422114	15.921	2.07308	0.0539169	0.187487	-4.56298
Q8WTY4	1.3024	14.5638	2.07303	0.0539218	0.187487	-4.56306
E9Q3S4	0.791657	19.7401	2.07209	0.0540191	0.187717	-4.56466
P62307	2.96015	13.5533	2.07144	0.054087	0.187845	-4.56577
P60840	3.16773	11.1698	2.07095	0.0541381	0.187848	-4.56661
Q9CQH3	-1.06999	16.4808	-2.07084	0.0541498	0.187848	-4.5668
Q91WD5	-0.488387	19.3974	-2.07038	0.0541969	0.187903	-4.56757
Q8C166	0.402954	18.8563	2.07008	0.0542288	0.187906	-4.5681
Q3TIR3	0.448962	16.4677	2.06888	0.0543538	0.188232	-4.57014
Q69ZR2	0.576948	15.6723	2.0682	0.054425	0.18837	-4.5713
O54962	2.11944	12.0604	2.06619	0.0546349	0.188889	-4.57471
Q8BGB5	2.32243	12.6601	2.06617	0.0546373	0.188889	-4.57475
Q8C0E3	1.04597	14.6201	2.06538	0.0547201	0.189004	-4.57609
Q8CI95	0.482749	16.4178	2.06509	0.0547497	0.189004	-4.57657
Q3TRM8	2.08933	14.6071	2.06496	0.0547643	0.189004	-4.57681
P60898	2.54653	10.2028	2.06314	0.0549553	0.189555	-4.57989
P57759	0.574844	20.3954	2.06191	0.0550847	0.189821	-4.58198
Q9WTI7	-0.492441	22.5361	-2.06182	0.0550951	0.189821	-4.58214
O70194	0.476226	17.1421	2.06115	0.0551651	0.189954	-4.58327
Q60778	1.62718	15.872	2.0594	0.0553508	0.190485	-4.58625
Q8K224	1.37616	11.7426	2.05798	0.0555017	0.190792	-4.58866
P40142	-0.437874	21.7734	-2.05797	0.055503	0.190792	-4.58868
O54984	0.473437	19.8409	2.05665	0.0556434	0.191166	-4.59092
Q64010	0.497364	18.1493	2.05571	0.0557434	0.191336	-4.59251
Q9CQ88	2.25952	12.5556	2.05537	0.0557799	0.191336	-4.59309
Q60575	0.544133	15.2031	2.05529	0.0557878	0.191336	-4.59321
Q3TAA7	0.683076	13.9124	2.05463	0.0558587	0.19147	-4.59434
P43276	0.685309	19.9925	2.05375	0.0559533	0.191686	-4.59584
Q9DB30	3.34053	13.3461	2.05121	0.0562254	0.192413	-4.60013
Q91VH6	0.45384	16.8772	2.05118	0.0562291	0.192413	-4.60019
P12242	-0.679372	11.2503	-2.04991	0.0563658	0.192772	-4.60234
Q6PAR0	2.37421	10.705	2.04957	0.0564024	0.192788	-4.60291
Q7TNG5	-0.502046	18.0663	-2.04914	0.056448	0.192835	-4.60363
Q6PD26	0.541011	17.0477	2.04764	0.056611	0.193198	-4.60618
O35566	-0.848577	16.2182	-2.0474	0.056637	0.193198	-4.60658
O70572	0.419068	17.0502	2.04728	0.0566502	0.193198	-4.60679
Q6IRU5	0.499562	18.9035	2.04664	0.0567189	0.193234	-4.60786
Q99JT9	2.21802	13.8694	2.04659	0.0567247	0.193234	-4.60795
Q80VI1	1.39864	14.1692	2.04625	0.0567617	0.193252	-4.60853
Q7TSH2	-0.430092	16.5362	-2.04467	0.0569333	0.19338	-4.6112
P61164	0.449952	19.1987	2.04462	0.0569382	0.19338	-4.61127
P54775	0.543833	17.295	2.04456	0.0569445	0.19338	-4.61137
P49935	0.974906	16.9567	2.04447	0.0569552	0.19338	-4.61154
Q61183	0.832506	14.5131	2.04443	0.0569591	0.19338	-4.6116
Q8VED9	1.30384	15.0435	2.04344	0.0570672	0.193638	-4.61328
P24547	0.654449	16.9265	2.04309	0.0571047	0.193656	-4.61386
Q9EP97	2.21268	11.7505	2.04119	0.0573132	0.194255	-4.61708
P17710	0.508653	18.6059	2.04075	0.0573615	0.19431	-4.61782
Q8BZJ7	2.49769	12.6694	2.0397	0.057476	0.194589	-4.61959
Q9JIA7	0.612417	15.9553	2.03719	0.0577522	0.19541	-4.62382
Q60838	1.30981	10.7345	2.03691	0.0577832	0.19541	-4.6243
Q9CRC8	0.760874	15.3903	2.03526	0.057965	0.195893	-4.62707
Q5FW57	1.21104	10.709	2.03503	0.0579907	0.195893	-4.62747
Q6NVF9	1.35871	15.1159	2.03397	0.0581077	0.196157	-4.62925
P49891	-1.07676	17.0014	-2.03321	0.0581927	0.196157	-4.63054
P49722	0.387668	17.8483	2.03306	0.0582092	0.196157	-4.63079
P63085	0.513807	19.703	2.03303	0.058212	0.196157	-4.63083
Q9JHI7	1.42446	14.9013	2.03286	0.058231	0.196157	-4.63112
Q80TE0	3.72416	15.9642	2.03218	0.0583064	0.196197	-4.63226
Q11011	0.40242	18.3275	2.03182	0.058347	0.196197	-4.63288
Q3UHA3	0.845902	14.284	2.03177	0.0583523	0.196197	-4.63296
Q8CH77	2.49144	11.1332	2.03084	0.0584555	0.196197	-4.63452
P18337	2.30989	11.9795	2.0308	0.0584607	0.196197	-4.63459
Q9R0P3	0.582205	19.52	2.03077	0.0584633	0.196197	-4.63463
Q8K019	2.06597	13.7835	2.03072	0.0584698	0.196197	-4.63473
Q810J8	2.54574	14.0052	2.02944	0.058612	0.196565	-4.63688
O88668	1.53089	15.5617	2.02908	0.0586527	0.196592	-4.63749
Q8R238	1.34566	15.5732	2.02599	0.0589988	0.197643	-4.64268
Q91X78	2.42243	12.9031	2.02538	0.0590669	0.197761	-4.6437
Q6PAM0	1.95955	12.8443	2.02484	0.0591277	0.197855	-4.64461
O54901	-0.900288	15.945	-2.02396	0.0592275	0.19808	-4.6461
Q6PDQ2	0.666464	15.7608	2.02295	0.059341	0.198246	-4.64779
Q3URU2	2.03881	10.4397	2.02294	0.0593426	0.198246	-4.64781
Q9CQ56	0.459786	16.2323	2.02187	0.0594634	0.198412	-4.6496
Q9ESK9	1.17763	14.7545	2.02186	0.0594644	0.198412	-4.64962
Q5PRF0	1.50796	13.5417	2.02147	0.0595086	0.198412	-4.65028
Q9CZB0	-0.6964	17.1745	-2.02128	0.0595306	0.198412	-4.6506
P13808	2.29664	12.2859	2.02105	0.0595565	0.198412	-4.65098
Q3TTY5	-0.662063	18.0255	-2.01992	0.0596847	0.19873	-4.65288
Q8VD04	1.6975	13.7033	2.01957	0.0597238	0.198745	-4.65346
P82347	-0.54975	19.4758	-2.0193	0.0597549	0.198745	-4.65392
Q8K2H2	0.500679	14.7909	2.01893	0.0597964	0.198774	-4.65453
Q9DAM7	1.27638	15.1354	2.01738	0.0599732	0.199252	-4.65713
Q9DCJ1	2.23165	12.9069	2.01631	0.060096	0.19955	-4.65894
P54923	0.610752	16.8924	2.01595	0.0601371	0.199577	-4.65954
Q6ZPF4	2.63442	9.76089	2.01554	0.0601835	0.199622	-4.66022
O70318	0.520148	20.1741	2.01425	0.0603317	0.200004	-4.66239
Q99PP7	2.11417	10.6821	2.01376	0.0603874	0.200079	-4.6632
Q61878	-1.76564	16.8671	-2.01318	0.0604547	0.200111	-4.66418
Q3UQ44	0.685723	17.0779	2.0131	0.0604633	0.200111	-4.66431
P28798	0.956675	15.9009	2.01117	0.0606859	0.200191	-4.66755
Q8JZY2	3.1642	12.117	2.01237	0.0605475	0.200191	-4.66553
Q91VY9	2.45264	11.4376	2.01204	0.0605855	0.200191	-4.66609
Q3V4B5	1.60562	14.451	2.01189	0.0606028	0.200191	-4.66634
Q9CQJ8	-0.524647	16.8071	-2.01158	0.0606379	0.200191	-4.66685
Q9Z0M6	0.680165	16.0635	2.0112	0.0606823	0.200191	-4.66749
Q8R5G7	1.17446	14.8117	2.01041	0.0607729	0.200368	-4.66881
O08600	0.519232	15.9307	2.01006	0.0608134	0.200393	-4.66939
Q60716	2.53355	13.5827	2.00973	0.0608516	0.20041	-4.66995
Q9EQK7	1.94275	14.5201	2.00914	0.06092	0.200526	-4.67094
P62500	2.8482	13.459	2.00859	0.0609835	0.200626	-4.67186
Q9EQ32	2.36752	13.2759	2.00756	0.0611032	0.20091	-4.67358
P59383	-0.693375	17.1782	-2.00635	0.0612431	0.201261	-4.6756
Q8CG70	2.70974	11.8289	2.00566	0.0613236	0.201398	-4.67675
Q8QZY2	2.6384	14.4306	2.00542	0.0613516	0.201398	-4.67716
Q8C0L6	-0.415941	16.9656	-2.00424	0.0614887	0.20157	-4.67912
Q8K370	-0.433052	17.9658	-2.00423	0.0614903	0.20157	-4.67914
E9Q735	0.523769	16.112	2.00408	0.0615077	0.20157	-4.67939
P57716	0.533903	17.8514	2.00383	0.0615373	0.20157	-4.67982
Q71RI9	-0.451523	16.498	-2.00262	0.0616785	0.201924	-4.68183
P35991	3.19933	11.1823	2.00184	0.0617693	0.202112	-4.68313
Q08761	1.706	16.4334	1.9998	0.0620091	0.202787	-4.68654
Q9ET22	0.720554	16.826	1.99947	0.0620476	0.202803	-4.68708
P60867	0.510589	19.6658	1.99815	0.0622031	0.203201	-4.68929
Q9JJG0	0.510904	14.8975	1.99778	0.0622473	0.203236	-4.68991
Q9QY81	1.91037	13.425	1.99691	0.0623494	0.203273	-4.69135
Q14CH1	-1.22824	16.0529	-1.99659	0.0623876	0.203273	-4.69189
B2RXS4	0.815512	15.1245	1.99652	0.0623959	0.203273	-4.69201
O70325	0.475029	20.8744	1.99615	0.062439	0.203273	-4.69262
B2RXR6	0.610981	14.4573	1.99613	0.0624423	0.203273	-4.69266
P97772	1.40237	11.9513	1.99597	0.0624604	0.203273	-4.69292
A2ARV4	-2.5566	12.3553	-1.99569	0.0624943	0.203274	-4.69339
Q8VCZ2	2.2588	12.3435	1.99498	0.0625779	0.203437	-4.69457
P51174	0.541083	20.5992	1.99201	0.0629309	0.204475	-4.69952
Q9JIF9	2.01888	10.7393	1.9909	0.0630631	0.204794	-4.70136
Q9WTX6	0.601689	16.3924	1.9895	0.0632304	0.205227	-4.70369
Q922J3	0.438662	15.605	1.98873	0.0633222	0.205342	-4.70496
Q64012	0.661939	16.8831	1.98864	0.0633337	0.205342	-4.70512
Q9CXW3	0.597948	17.4268	1.98793	0.0634191	0.205425	-4.70631
O08756	-0.373796	20.3098	-1.98786	0.0634271	0.205425	-4.70642
Q9Z0N1	0.433512	16.8567	1.98614	0.0636336	0.205984	-4.70927
Q9CQ10	1.6134	15.5787	1.98552	0.0637088	0.206117	-4.71031
Q8BP67	0.727226	18.215	1.98477	0.0637986	0.206297	-4.71155
Q9DB16	0.7785	15.391	1.98434	0.0638504	0.206354	-4.71226
Q64437	0.66016	11.0515	1.98355	0.0639464	0.206554	-4.71358
Q8BLY1	-0.74335	15.8509	-1.98296	0.0640169	0.206601	-4.71455
P03921	-1.78441	15.9536	-1.98237	0.0640886	0.206601	-4.71553
Q9CZ69	-2.16165	13.0293	-1.98222	0.0641071	0.206601	-4.71578
Q9CQZ0	0.831706	15.1508	1.98218	0.0641112	0.206601	-4.71584
Q9ERG0	0.726216	17.5168	1.98201	0.0641321	0.206601	-4.71613
P62869	0.480997	19.4066	1.98173	0.0641659	0.206601	-4.71659
P82343	1.09067	16.1344	1.98106	0.0642475	0.206656	-4.7177
Q8BUK6	0.522079	16.7585	1.98092	0.0642651	0.206656	-4.71795
G5E8K5	-0.584538	15.9903	-1.98067	0.0642946	0.206656	-4.71835
P55258	0.542535	16.4229	1.98018	0.0643539	0.206656	-4.71916
Q8R151	1.40446	15.1858	1.97993	0.0643848	0.206656	-4.71958
Q80XI4	1.73732	14.2717	1.97966	0.0644182	0.206656	-4.72003
O08919	0.79987	15.1652	1.97962	0.064422	0.206656	-4.72009
Q3USZ8	-1.43983	10.9951	-1.97741	0.0646922	0.207413	-4.72376
O70492	0.779529	19.3887	1.97426	0.0650778	0.208539	-4.72897
Q9WV55	0.443642	18.7678	1.97333	0.0651915	0.208792	-4.7305
Q3TIV5	1.52484	14.3687	1.97189	0.0653695	0.209252	-4.7329
Q3TRM4	2.8712	11.726	1.97129	0.0654426	0.209375	-4.73388
P15532	0.606223	19.7241	1.97034	0.06556	0.209592	-4.73545
Q8VHL1	1.18263	16.5374	1.97018	0.0655798	0.209592	-4.73571
P61358	0.726595	19.3695	1.9692	0.0657017	0.209757	-4.73734
Q99MZ3	0.323012	9.20449	1.96912	0.0657117	0.209757	-4.73747
Q8BXQ2	0.445829	15.232	1.96893	0.0657354	0.209757	-4.73779
Q8R4T1	-1.81298	10.3488	-1.96758	0.0659024	0.210179	-4.74001
Q8R3V5	-0.391184	17.032	-1.96721	0.0659479	0.210213	-4.74062
Q8CBE3	0.939073	15.7053	1.96367	0.06639	0.211461	-4.74647
Q8CGE8	1.54607	14.6115	1.96351	0.0664093	0.211461	-4.74673
P21126	0.627998	16.3067	1.9626	0.066523	0.211712	-4.74823
Q9Z2E9	0.597038	17.2205	1.96148	0.0666639	0.212005	-4.75008
P99029	0.571895	21.2873	1.96131	0.0666851	0.212005	-4.75036
Q99KN9	0.620842	17.0728	1.96087	0.0667408	0.21207	-4.75109
Q8CE50	1.88576	11.8548	1.9594	0.066925	0.212544	-4.7535
P31532	1.10939	15.9735	1.95891	0.0669871	0.21263	-4.75432
O89116	-2.22789	10.0072	-1.9579	0.0671146	0.212815	-4.75598
P18181	2.2335	12.3504	1.95789	0.0671158	0.212815	-4.756
Q9QXE0	0.553845	15.843	1.957	0.0672285	0.213061	-4.75747
Q91WF7	0.623517	15.2956	1.95661	0.0672776	0.213104	-4.7581
Q99K70	0.479638	17.3221	1.95564	0.0674006	0.213172	-4.7597
Q61990	0.614806	20.0934	1.95554	0.0674124	0.213172	-4.75986
A2AN08	0.431321	17.3537	1.95547	0.067421	0.213172	-4.75997
P51912	-0.492692	21.0298	-1.95533	0.06744	0.213172	-4.76021
Q8BMS9	-2.64512	17.5401	-1.95479	0.0675078	0.213275	-4.76109
P54310	-0.376977	22.3123	-1.95323	0.0677065	0.213791	-4.76367
P52840	-0.601698	18.2682	-1.95217	0.0678406	0.214062	-4.7654
Q6P069	0.600991	18.6825	1.952	0.0678628	0.214062	-4.76568
O08997	0.521592	19.1398	1.95138	0.0679417	0.214199	-4.7667
Q60790	0.40349	15.8518	1.95102	0.0679875	0.214232	-4.76729
Q8BFR4	0.584136	16.7785	1.9506	0.0680413	0.214289	-4.76798
P58069	1.0635	15.0198	1.94877	0.0682754	0.214915	-4.77098
Q9D8W5	0.486139	17.1396	1.94845	0.0683172	0.214935	-4.77152
Q8BHN3	-0.357643	19.8472	-1.9469	0.0685153	0.215343	-4.77405
Q61559	0.578281	16.4678	1.94688	0.0685184	0.215343	-4.77409
Q8BRF7	0.476777	15.9291	1.94604	0.0686258	0.215569	-4.77546
Q3TC93	0.901612	16.1068	1.9435	0.0689545	0.216489	-4.77964
O35640	1.21707	15.2461	1.94201	0.0691465	0.216979	-4.78207
P26883	0.476579	20.1235	1.94158	0.0692034	0.217045	-4.78279
P61967	0.557696	15.0169	1.94028	0.0693722	0.217397	-4.78491
Q9WUA2	0.415726	18.5672	1.94016	0.0693874	0.217397	-4.7851
Q9CQ89	0.527999	18.1981	1.93985	0.0694277	0.217411	-4.78561
P46664	0.537393	16.9003	1.93917	0.0695157	0.217574	-4.78672
Q9JLV1	0.539041	17.2268	1.93771	0.0697066	0.218058	-4.78911
Q8BMB3	1.88661	9.78574	1.93688	0.0698156	0.218191	-4.79048
Q01768	0.561342	22.2769	1.93683	0.0698212	0.218191	-4.79055
Q91VC9	-0.609612	16.4046	-1.93611	0.0699154	0.218373	-4.79172
P35980	0.478953	19.3443	1.93537	0.0700132	0.21854	-4.79294
Q8BWQ6	0.451654	14.5656	1.93484	0.0700818	0.21854	-4.7938
Q80ZA4	0.819102	16.8449	1.93468	0.0701033	0.21854	-4.79407
Q8BHF7	1.21865	15.2811	1.93435	0.0701461	0.21854	-4.7946
Q69Z99	2.25748	11.4987	1.93394	0.0702001	0.21854	-4.79527
Q91ZA3	-0.444205	19.6333	-1.93381	0.0702175	0.21854	-4.79549
Q8VE80	1.26965	15.1694	1.93378	0.0702218	0.21854	-4.79554
O55125	-1.46718	16.2133	-1.93255	0.0703835	0.218863	-4.79755
Q80SZ7	-2.74442	12.9079	-1.93244	0.070398	0.218863	-4.79773
Q8CAK1	1.80438	15.2815	1.93176	0.0704877	0.218939	-4.79884
Q924Z6	1.46688	11.6869	1.9317	0.0704948	0.218939	-4.79893
Q9Z1K5	0.511108	16.1151	1.93031	0.0706784	0.219361	-4.8012
Q71LX4	0.411889	19.159	1.93007	0.0707105	0.219361	-4.80159
Q920L1	-1.4376	15.5071	-1.92976	0.0707523	0.219361	-4.80211
P62264	0.533127	18.9146	1.92943	0.0707957	0.219361	-4.80264
P21279	-0.583294	17.5443	-1.9293	0.070812	0.219361	-4.80285
Q8BX10	0.84946	15.6564	1.92862	0.0709029	0.21953	-4.80396
Q9JHI0	3.11267	13.2728	1.92682	0.0711418	0.220158	-4.8069
Q91YI0	-0.695305	16.5919	-1.92631	0.0712089	0.220184	-4.80772
Q4KML4	0.706993	17.1874	1.92621	0.0712231	0.220184	-4.80789
Q8K2Z2	-2.48887	13.582	-1.92448	0.0714536	0.220783	-4.81071
P62849	0.536876	17.8672	1.92339	0.0715991	0.22112	-4.81248
Q9Z1K6	2.72575	13.1941	1.92245	0.0717245	0.221395	-4.81401
Q8BMS1	0.495296	21.1677	1.92196	0.0717902	0.221484	-4.81481
Q7TN98	1.95396	10.0923	1.92162	0.0718358	0.221512	-4.81536
Q61687	2.40202	12.2004	1.9207	0.0719596	0.221574	-4.81686
Q99N89	2.26434	10.9082	1.9207	0.0719597	0.221574	-4.81686
Q08879	-0.528909	16.5368	-1.92066	0.0719657	0.221574	-4.81694
Q6PF93	0.547809	15.1694	1.91976	0.072086	0.221831	-4.81839
Q8CGN5	-0.377486	23.0144	-1.91853	0.0722512	0.221833	-4.82038
Q8CHT0	-0.476204	19.193	-1.91932	0.0721458	0.221833	-4.81911
P63017	0.417912	23.587	1.91872	0.0722258	0.221833	-4.82008
Q5SV80	1.80142	11.4496	1.91855	0.0722488	0.221833	-4.82036
Q9DB29	-0.613981	19.079	-1.91822	0.072294	0.221833	-4.8209
Q9JLI6	1.61922	15.0272	1.91812	0.0723065	0.221833	-4.82105
P58742	0.779383	15.52	1.9178	0.0723501	0.221854	-4.82158
Q80W94	0.654874	15.0208	1.91636	0.0725445	0.222338	-4.82391
P05017	1.88554	9.70423	1.91592	0.0726041	0.222407	-4.82463
P97858	1.47251	14.187	1.91499	0.0727307	0.222656	-4.82615
Q921M4	0.478488	16.3754	1.91478	0.0727589	0.222656	-4.82648
Q8CD92	2.25116	10.7493	1.91436	0.0728161	0.222719	-4.82717
O88507	1.85378	13.9158	1.91289	0.0730156	0.223216	-4.82955
Q3TP92	2.06763	12.2875	1.91229	0.0730982	0.223355	-4.83053
A3KMP2	-0.463445	17.9341	-1.91193	0.0731465	0.22339	-4.83111
Q91W39	2.53659	10.9271	1.91017	0.0733867	0.223986	-4.83396
Q99LC9	1.33598	14.3803	1.90996	0.0734157	0.223986	-4.83431
Q99MR6	0.516143	17.1683	1.90955	0.0734715	0.224035	-4.83497
Q8CDM8	4.11739	11.7648	1.90914	0.0735283	0.224035	-4.83564
P81117	0.718527	16.4684	1.90885	0.0735681	0.224035	-4.83611
Q9JI39	-0.577003	14.8191	-1.90876	0.0735798	0.224035	-4.83625
Q99J09	0.537845	16.1723	1.90752	0.0737497	0.224424	-4.83825
O35609	0.537496	16.6326	1.90663	0.0738722	0.224424	-4.8397
O35295	0.511772	17.2935	1.90657	0.0738804	0.224424	-4.83979
P97310	1.66447	15.453	1.90626	0.0739234	0.224424	-4.8403
Q61409	-0.484335	16.6413	-1.90624	0.0739266	0.224424	-4.84034
P70451	3.00273	12.0058	1.90621	0.0739302	0.224424	-4.84038
Q8BP78	2.17172	14.7512	1.90583	0.0739829	0.224472	-4.841
Q9EPL8	0.396967	17.6404	1.90521	0.0740677	0.224515	-4.842
Q8BL99	1.73688	9.58446	1.90518	0.0740715	0.224515	-4.84204
Q6ZWQ7	1.9204	16.6744	1.90373	0.0742722	0.225011	-4.84439
O70503	0.545466	20.0856	1.90328	0.0743349	0.225088	-4.84513
Q61387	2.95863	13.5688	1.90245	0.0744487	0.225211	-4.84646
[truncated: 4,051 more rows]

## Sheet: LIMMA Low-INFL vs CTRL
	logFC	AveExpr	t	P.Value	adj.P.Val	B
Q9D8S4	5.64188	14.6816	12.7278	4.9112e-10	2.97128e-06	12.6699
P40338	4.60594	13.988	12.0322	1.15296e-09	3.48771e-06	11.954
Q9ES52	4.82812	13.6929	11.4004	2.59268e-09	4.03848e-06	11.2614
Q9CQ02	3.93983	12.7086	11.3779	2.67007e-09	4.03848e-06	11.236
Q8BGY9	5.04077	15.6587	10.2767	1.19964e-08	1.45156e-05	9.92087
O89016	4.81896	13.1237	10.0269	1.71533e-08	1.72962e-05	9.60258
Q63739	3.82621	10.9651	9.54218	3.49836e-08	3.02358e-05	8.96263
Q9DBS2	4.39105	13.0503	8.938	8.82338e-08	6.67268e-05	8.12161
Q8C255	4.22277	12.68	8.51206	1.73811e-07	0.000108476	7.49849
Q9EPK5	4.28489	14.2863	8.49286	1.79298e-07	0.000108476	7.46979
P49446	4.88959	12.6487	8.39726	2.09447e-07	0.000115196	7.32614
P56485	3.62354	10.4918	8.18405	2.97447e-07	0.000149963	7.00097
Q07646	2.21463	17.6572	7.78581	5.81666e-07	0.000270698	6.37569
Q9D975	4.59052	14.1745	7.32264	1.30243e-06	0.000562835	5.6185
Q7TSI1	5.11099	12.4204	7.03929	2.16301e-06	0.000872414	5.13917
Q9QYR6	1.95331	16.4116	6.98397	2.39124e-06	0.000904189	5.04414
P49718	4.41376	13.8644	6.84626	3.07502e-06	0.00109435	4.80557
Q8K4X7	4.45384	12.1007	6.75448	3.64143e-06	0.00122393	4.64495
Q922S4	1.43538	16.5933	6.65874	4.34905e-06	0.00134732	4.47602
Q91WK0	3.6196	12.9575	6.64594	4.45395e-06	0.00134732	4.45333
Q9JKY0	3.70189	12.0106	6.58701	4.97197e-06	0.0014324	4.34855
Q91V92	-1.7133	20.6153	-6.43527	6.61485e-06	0.00177207	4.0763
Q8VBX6	1.40093	16.224	6.42562	6.73681e-06	0.00177207	4.05886
Q99JF5	4.44406	12.6667	6.11889	1.21176e-05	0.00305465	3.49749
Q5SWU9	-1.39879	20.4047	-5.97643	1.59848e-05	0.00345385	3.23204
P24288	3.46533	12.7974	6.01491	1.48286e-05	0.00345385	3.30403
P56198	1.66684	15.8667	6.00434	1.51375e-05	0.00345385	3.28426
Q61805	1.98609	17.0123	5.99475	1.54233e-05	0.00345385	3.26633
Q76N33	3.36705	13.003	5.95089	1.68034e-05	0.00350553	3.18414
Q8CJ12	-5.11575	12.1349	-5.88647	1.90665e-05	0.00384507	3.0629
Q9QUT0	4.08137	14.549	5.80868	2.22258e-05	0.00433762	2.91569
Q5RL79	4.56446	13.2888	5.57063	3.57043e-05	0.00675035	2.46002
Q6GQT1	5.15201	15.8668	5.5426	3.77719e-05	0.00690814	2.40585
Q6TCG2	2.13546	16.8755	5.52895	3.88226e-05	0.00690814	2.37945
P23927	4.25648	15.2264	5.51154	4.02078e-05	0.00691305	2.34571
Q9ET54	1.47291	16.8181	5.50021	4.11355e-05	0.00691305	2.32375
Q80XC2	3.81418	11.7527	5.44343	4.61325e-05	0.00726826	2.21339
Q8CIG9	3.80628	13.1954	5.42142	4.82336e-05	0.00726826	2.1705
Q9QYR9	-1.63959	15.8042	-5.41999	4.83733e-05	0.00726826	2.16772
P49962	5.75994	13.3775	5.4157	4.87956e-05	0.00726826	2.15935
P43883	6.46753	16.3788	5.40488	4.98768e-05	0.00726826	2.13824
Q8BG94	4.64203	12.8433	5.39917	5.04574e-05	0.00726826	2.1271
Q8CCK0	-5.38471	11.5345	-5.36426	5.41633e-05	0.00754728	2.05883
Q61268	4.27516	14.7737	5.35771	5.48893e-05	0.00754728	2.04601
Q9EP71	3.63009	13.3179	5.33975	5.69313e-05	0.00765409	2.01082
Q64521	-1.14788	18.1772	-5.2846	6.37045e-05	0.00837853	1.90252
P19324	1.33853	22.3143	5.20134	7.55371e-05	0.00972339	1.73833
Q9R0B9	4.30852	12.6881	5.16363	8.16201e-05	0.0102875	1.66367
Q921Q3	3.97145	11.9183	5.14709	8.44428e-05	0.0104261	1.63089
Q05020	4.37445	15.8938	5.11986	8.93131e-05	0.0108069	1.57683
Q99ME2	3.81042	10.7722	5.07393	9.81903e-05	0.0116481	1.48547
Q64449	3.03302	16.6605	5.01941	0.000109914	0.0125562	1.3767
P70429	4.36933	13.8528	5.01905	0.000109997	0.0125562	1.37597
Q9D6J1	1.62071	16.4539	4.99544	0.000115513	0.0128277	1.32878
Q60860	1.7059	17.7706	4.99086	0.000116615	0.0128277	1.31962
Q9D486	4.55208	13.5237	4.95841	0.000124745	0.0133552	1.25463
Q5EBG6	3.92379	15.3158	4.95199	0.000126421	0.0133552	1.24176
Q6QLQ4	3.68279	13.176	4.94589	0.000128034	0.0133552	1.22953
P41160	4.67071	13.9809	4.92182	0.000134611	0.0138034	1.18121
P83093	3.83136	12.1607	4.89944	0.000141036	0.0142211	1.13625
Q9JLM8	1.29025	16.1438	4.87326	0.00014895	0.0146872	1.08358
Q91ZU6	0.920118	16.4094	4.86006	0.000153113	0.0146872	1.057
Q61216	3.22785	13.5332	4.85414	0.000155015	0.0146872	1.04509
Q3TUH1	4.52227	13.8963	4.84825	0.000156935	0.0146872	1.03321
O35177	3.18754	13.276	4.84563	0.000157796	0.0146872	1.02793
Q8K1A6	-4.3205	16.0708	-4.81814	0.000167134	0.0152819	0.972478
Q8VDU5	3.86776	10.5579	4.81217	0.000169238	0.0152819	0.960415
Q8BH86	1.24203	17.1172	4.78372	0.000179629	0.0159817	0.902939
Q9JL62	1.13589	17.1145	4.75807	0.000189557	0.0160661	0.851049
Q8JZK9	1.40746	18.5285	4.7571	0.000189941	0.0160661	0.8491
Q9JKS4	1.46712	14.7402	4.75433	0.000191048	0.0160661	0.843491
Q9D2R0	-1.06816	19.8484	-4.75395	0.0001912	0.0160661	0.842724
Q91YE8	2.66822	15.7099	4.73898	0.000197308	0.0160775	0.812395
Q80UG5	1.35441	18.7992	4.73439	0.00019922	0.0160775	0.803095
Q60872	5.09141	14.0376	4.73417	0.000199308	0.0160775	0.802665
Q922Q8	1.15456	18.7863	4.71895	0.000205789	0.0163819	0.771803
Q9JJE7	1.18817	18.4564	4.6868	0.000220186	0.0173004	0.706582
P70387	1.69841	17.288	4.67703	0.000224764	0.0173062	0.686736
Q8BJ56	-1.00663	19.2154	-4.67446	0.000225982	0.0173062	0.681526
Q9ES70	4.55204	12.2538	4.65774	0.000234086	0.0174842	0.647543
Q8R0A0	3.6873	13.1541	4.64924	0.000238318	0.0174842	0.630263
Q99M71	2.85926	13.6566	4.64822	0.00023883	0.0174842	0.628193
P06728	1.73407	21.4761	4.64583	0.000240037	0.0174842	0.623332
A1L314	3.79998	14.6384	4.64049	0.000242756	0.0174842	0.612471
Q69ZH9	3.28163	11.6598	4.62162	0.000252622	0.0179807	0.574054
Q9D6W8	3.29557	15.1115	4.59262	0.000268576	0.0188625	0.514999
Q9D1A0	3.32543	14.2028	4.58794	0.000271245	0.0188625	0.505463
Q91WE4	4.69791	12.3699	4.58147	0.000274986	0.0189053	0.492257
Q8BQM4	4.12271	13.2245	4.57415	0.000279271	0.0189841	0.477348
A6H5Z3	4.94081	13.2183	4.55507	0.000290777	0.0195467	0.438418
Q8R087	1.23713	14.8587	4.54426	0.000297512	0.0197796	0.41634
Q7TMW6	2.83908	13.5451	4.48095	0.000340251	0.02211	0.286939
P52293	3.63907	13.509	4.48026	0.000340746	0.02211	0.285536
Q6NSU3	3.83265	14.0896	4.47344	0.000345715	0.02211	0.271581
Q6A0A2	3.18686	13.7019	4.47145	0.000347181	0.02211	0.267502
O35601	3.36656	12.4581	4.45151	0.000362198	0.022826	0.226688
Q9CQE3	3.35806	11.549	4.44435	0.000367753	0.0229372	0.21202
Q9CYV5	1.27887	17.269	4.42796	0.000380794	0.0235082	0.178437
P50172	-1.65004	18.1565	-4.38469	0.000417534	0.025516	0.0896802
Q3V1T4	1.14058	16.9628	4.36997	0.00043083	0.0260264	0.0594799
P35951	4.4088	12.5325	4.366	0.00043449	0.0260264	0.0513279
Q60875	1.41846	15.8071	4.35571	0.000444125	0.0263427	0.0301992
Q6VNB8	3.143	12.9872	4.34415	0.000455213	0.026576	0.0064439
Q9R1Q6	2.8161	12.1514	4.34247	0.000456844	0.026576	0.00299968
Q91W59	3.10884	13.8497	4.32689	0.000472287	0.0265892	-0.0290226
Q8BH73	3.86626	14.7119	4.32602	0.00047316	0.0265892	-0.0308024
Q9CX60	4.39055	13.3421	4.32519	0.000474	0.0265892	-0.0325101
Q9Z280	-3.69967	12.2625	-4.32455	0.000474649	0.0265892	-0.0338292
O70458	1.47796	13.6204	4.31989	0.00047939	0.0266084	-0.0434016
Q9D394	3.18523	14.3171	4.30971	0.000489926	0.0268914	-0.0643395
P70389	1.08507	17.0109	4.30642	0.000493379	0.0268914	-0.0711025
Q9EQQ2	0.973237	17.4175	4.28535	0.000516087	0.0276215	-0.114436
Q99MP8	3.84343	11.2432	4.28308	0.000518604	0.0276215	-0.11912
Q8BZA9	0.918107	16.1213	4.28139	0.000520472	0.0276215	-0.122583
P54103	0.953532	15.0837	4.26863	0.000534865	0.027929	-0.148848
P16254	3.24203	13.6	4.26808	0.000535499	0.027929	-0.149988
Q8BHZ0	1.22667	16.2157	4.26285	0.000541519	0.0280016	-0.160752
P40936	-2.03596	17.0438	-4.25665	0.000548745	0.0281348	-0.173515
Q8VD65	0.703917	16.5675	4.24833	0.000558589	0.0282235	-0.190632
Q9CQJ4	4.09772	12.1368	4.24732	0.000559805	0.0282235	-0.192726
Q6SJQ0	6.4736	13.0669	4.2293	0.000581798	0.0288699	-0.22982
O54998	0.956894	15.3771	4.22901	0.000582169	0.0288699	-0.230434
Q8VIM9	1.09162	17.2393	4.22285	0.000589892	0.029015	-0.243118
Q8CIE4	3.3366	13.4075	4.18164	0.00064432	0.0314366	-0.328052
Q8VDS8	0.765087	14.9839	4.16669	0.0006653	0.0322005	-0.35888
Q5SV80	3.90321	11.4496	4.15701	0.000679243	0.0326145	-0.378835
Q9Z2D3	1.12185	16.2536	4.15207	0.000686478	0.0327023	-0.389027
Q8VCB3	1.34077	16.3823	4.14024	0.000704122	0.0332808	-0.413438
Q9Z0R6	3.15241	14.0475	4.13588	0.000710725	0.0333324	-0.422415
Q8BHC4	5.17125	15.249	4.12857	0.000721968	0.0334622	-0.437511
P14901	3.61459	15.1457	4.1269	0.000724553	0.0334622	-0.440948
Q9WU81	4.87867	13.1219	4.09329	0.000778758	0.0356931	-0.510322
Q3ZK22	3.28947	12.165	4.0779	0.00080493	0.0363678	-0.542101
P11247	3.3008	11.6623	4.07757	0.000805502	0.0363678	-0.542784
Q9QZL0	1.98834	14.4287	4.05943	0.000837508	0.0375328	-0.580238
Q3UGX3	-3.8245	11.6198	-4.05437	0.000846664	0.0376641	-0.590688
Q9D8Y7	4.51077	12.2502	4.03528	0.000882111	0.03889	-0.630101
Q99MB7	3.73586	10.4915	4.03267	0.000887077	0.03889	-0.635495
Q9D5V6	0.848608	16.9992	4.02336	0.000905006	0.0392715	-0.654721
Q91YX5	1.18358	19.564	4.02144	0.000908762	0.0392715	-0.6587
Q9QYS9	1.6683	17.0172	4.01293	0.000925549	0.0396755	-0.676284
O09131	1.15695	20.6284	4.00937	0.000932655	0.0396755	-0.683631
Q8BGF6	3.74805	15.2497	4.00373	0.00094403	0.0396755	-0.695276
Q9CQI3	1.00893	17.8236	4.00358	0.000944343	0.0396755	-0.695594
Q9CXT7	4.03066	13.814	3.99841	0.000954905	0.0398426	-0.706277
Q5SSH7	3.11205	13.9556	3.98339	0.000986253	0.0403549	-0.7373
Q8K1T1	3.32652	13.2127	3.9819	0.000989435	0.0403549	-0.740393
P62482	3.53071	13.511	3.98153	0.000990215	0.0403549	-0.74115
Q641K1	3.3074	10.4493	3.97982	0.000993864	0.0403549	-0.744682
Q9CWR2	2.97601	10.9992	3.95537	0.00104757	0.0416767	-0.795209
P70122	0.925954	17.7537	3.95511	0.00104814	0.0416767	-0.795733
Q9CR25	3.46326	12.4689	3.95365	0.00105145	0.0416767	-0.798764
Q9JHQ5	3.97463	11.8621	3.95253	0.00105397	0.0416767	-0.801064
P35922	0.93714	16.564	3.94627	0.00106827	0.0419678	-0.813999
Q9D4H2	4.50175	12.8851	3.93709	0.0010896	0.0425294	-0.832969
Q8K245	3.56643	13.1545	3.93214	0.00110129	0.0427102	-0.843214
O88508	3.38767	11.6197	3.9257	0.00111666	0.0428849	-0.856514
Q91Z22	4.2325	13.5156	3.92292	0.00112336	0.0428849	-0.862259
Q9D379	1.1946	19.9917	3.9214	0.00112706	0.0428849	-0.865411
Q3UNX5	-3.75866	10.6392	-3.9131	0.00114738	0.0433854	-0.882561
O35929	3.70258	13.4459	3.90663	0.00116348	0.0437209	-0.895931
P70248	3.36148	13.9516	3.8971	0.0011876	0.0443517	-0.915614
Q8VEK2	3.85201	12.2867	3.88865	0.00120943	0.0448899	-0.933086
P16879	3.28823	13.4344	3.8811	0.00122925	0.0453474	-0.94868
Q3UGS4	4.52369	11.6435	3.86987	0.00125936	0.0460085	-0.971887
P52196	-1.44015	17.3663	-3.86876	0.00126238	0.0460085	-0.974184
Q8BUB4	3.40136	13.2344	3.8658	0.00127047	0.0460259	-0.980306
Q61503	-4.44917	12.7807	-3.85566	0.00129851	0.0467618	-1.00124
Q99LL3	2.87452	13.5365	3.84414	0.00133116	0.0473799	-1.02505
Q9JM52	0.779791	16.655	3.84408	0.00133134	0.0473799	-1.02518
Q921R8	4.18042	11.359	3.82569	0.00138516	0.0490073	-1.06317
Q8BPM2	3.386	13.2619	3.82276	0.00139394	0.0490309	-1.06922
Q8K1I7	3.5956	14.3845	3.81885	0.00140574	0.0491602	-1.07729
Q921Y4	2.9621	13.8106	3.81455	0.00141885	0.0492356	-1.08619
P07214	0.918972	19.906	3.81281	0.00142417	0.0492356	-1.08978
Q9ER64	4.1813	12.1012	3.79419	0.00148251	0.0508037	-1.12824
P59016	4.88257	14.9125	3.7922	0.00148888	0.0508037	-1.13235
Q62241	2.64298	14.7309	3.79038	0.00149472	0.0508037	-1.1361
P07742	3.35457	13.6907	3.77809	0.00153489	0.0517801	-1.16149
Q8C5P7	1.35973	16.1485	3.77637	0.00154057	0.0517801	-1.16503
Q91WE1	3.5916	12.6209	3.76725	0.00157117	0.0522483	-1.18387
Q8BHS6	3.69172	12.3894	3.76565	0.00157662	0.0522483	-1.18718
Q6ZWY8	2.80078	16.1461	3.76089	0.00159288	0.0522483	-1.19701
Q0GNC1	0.928784	15.4435	3.75952	0.00159759	0.0522483	-1.19983
Q8BQ30	3.53328	13.7231	3.75887	0.00159982	0.0522483	-1.20117
Q60715	3.12186	15.003	3.757	0.00160631	0.0522483	-1.20505
Q9CYD3	1.11224	16.744	3.73597	0.00168081	0.0541396	-1.24844
Q8VHR5	3.56471	13.4535	3.73555	0.00168235	0.0541396	-1.24932
P62911	3.81849	14.4299	3.72306	0.00172829	0.0553235	-1.2751
O55098	1.31015	15.279	3.71879	0.00174428	0.0554418	-1.28391
Q9ERT9	3.98319	14.2361	3.71719	0.00175031	0.0554418	-1.28721
Q62356	2.46287	14.0425	3.7031	0.00180432	0.056855	-1.31629
P15306	-1.62904	16.4485	-3.69828	0.00182316	0.0571507	-1.32622
P00493	0.897487	19.3967	3.69085	0.0018526	0.057637	-1.34154
Q8BWS5	2.74616	13.0798	3.68953	0.00185788	0.057637	-1.34426
Q8K2Q7	2.86389	14.1451	3.6872	0.00186725	0.057637	-1.34907
Q9DB60	1.04053	19.8694	3.68353	0.00188209	0.0578004	-1.35665
Q9QYB1	0.900688	19.7909	3.68068	0.00189369	0.0578627	-1.36252
Q8BLN5	1.4327	17.0977	3.67751	0.00190668	0.0579669	-1.36905
Q8BZM1	1.82703	13.202	3.67479	0.0019179	0.0580165	-1.37466
Q9D1R9	0.973987	18.0453	3.67238	0.00192789	0.0580286	-1.37963
P01638	-1.42502	17.4598	-3.66883	0.00194271	0.0581713	-1.38695
Q921L5	1.30501	15.1404	3.66665	0.00195186	0.0581713	-1.39144
P62862	2.87985	16.1101	3.66282	0.00196807	0.0583668	-1.39935
Q9DCR2	1.21071	16.7568	3.66037	0.0019785	0.0583898	-1.4044
P23298	3.41858	12.7979	3.63617	0.00208452	0.06122	-1.45428
Q8R2G6	4.4133	10.7322	3.62629	0.00212938	0.0622354	-1.47462
Q3USZ8	2.63869	10.9951	3.62387	0.00214052	0.0622603	-1.47961
Q9QX47	3.97531	13.733	3.61843	0.00216581	0.062664	-1.49082
Q9D281	2.33782	16.4964	3.61478	0.0021829	0.062664	-1.49833
Q99JR1	-0.868655	18.4687	-3.61222	0.002195	0.062664	-1.50361
Q5SUA5	3.13253	14.5199	3.61204	0.00219583	0.062664	-1.50397
Q9CXZ1	-0.746536	17.3101	-3.60572	0.00222598	0.0632263	-1.51699
Q99N69	4.62479	13.1497	3.59981	0.00225454	0.0636188	-1.52917
Q8VDG5	3.46735	14.8535	3.59852	0.00226083	0.0636188	-1.53183
Q8BPN8	3.47807	13.0596	3.59562	0.00227497	0.0637202	-1.53778
P19096	-0.802246	22.9813	-3.59327	0.00228654	0.0637492	-1.54262
Q8BGY7	4.20865	14.6474	3.58442	0.00233058	0.0644495	-1.56083
Q9D7G0	1.34402	19.1386	3.58363	0.00233459	0.0644495	-1.56247
O08605	3.59422	11.3278	3.58184	0.00234362	0.0644495	-1.56615
Q8BMA6	0.914495	16.2079	3.57284	0.00238951	0.0654142	-1.58466
O70622	3.09487	15.5234	3.56919	0.00240841	0.0654723	-1.59218
Q3U2P1	0.885366	16.3496	3.56825	0.00241328	0.0654723	-1.5941
Q8CBA2	0.701271	16.3063	3.56549	0.00242768	0.0654834	-1.59978
Q9JKP7	3.34589	12.3164	3.56403	0.00243533	0.0654834	-1.60278
P61924	2.60795	16.5719	3.55995	0.00245687	0.0657701	-1.61118
Q99MS7	0.888306	16.2337	3.55574	0.00247923	0.0659102	-1.61982
P20491	3.51594	13.6343	3.55364	0.00249052	0.0659102	-1.62416
P97820	1.0299	16.1974	3.55284	0.00249478	0.0659102	-1.62579
Q91YQ1	3.52127	12.3727	3.54961	0.00251225	0.066083	-1.63244
Q99LJ6	1.09093	17.9495	3.53271	0.00260544	0.0679586	-1.66718
P70698	0.925321	15.9291	3.5326	0.00260602	0.0679586	-1.66739
Q9QZK2	2.8545	14.9495	3.52678	0.00263893	0.0684684	-1.67935
Q8R0F3	2.81312	14.6956	3.52515	0.0026482	0.0684684	-1.68269
Q91W67	3.62864	11.5957	3.5224	0.00266396	0.0685829	-1.68835
P62880	-0.906848	18.6253	-3.51735	0.00269312	0.0690396	-1.69872
Q9EP95	3.72554	14.8521	3.50201	0.00278359	0.0710579	-1.73021
P52431	6.56068	13.2652	3.49264	0.00284036	0.0716611	-1.74944
Q99LU0	3.12413	16.4145	3.49155	0.00284705	0.0716611	-1.75169
Q8BW75	-0.823355	17.4625	-3.49093	0.00285085	0.0716611	-1.75296
Q6P9Q6	0.931322	16.1823	3.49032	0.0028546	0.0716611	-1.75421
Q9DBW0	0.936733	16.3596	3.48128	0.00291074	0.0725012	-1.77276
Q8BZ20	0.797606	15.2906	3.47963	0.0029211	0.0725012	-1.77614
Q91WU0	-1.06002	18.2512	-3.47835	0.00292916	0.0725012	-1.77877
P55065	1.05518	17.9155	3.47727	0.002936	0.0725012	-1.78099
Q9R0E1	0.914394	17.0068	3.47057	0.00297868	0.0732562	-1.79473
Q8CHW4	0.747716	15.7593	3.46832	0.00299311	0.0733131	-1.79933
Q8BUE4	0.588124	19.1533	3.4632	0.00302629	0.0738268	-1.80983
P22777	3.96366	13.0789	3.45361	0.00308943	0.0747808	-1.82948
Q80W94	1.18016	15.0208	3.45351	0.00309012	0.0747808	-1.82969
P40142	-0.732625	21.7734	-3.44327	0.00315898	0.0761428	-1.85067
Q8C310	3.18212	11.88	3.42768	0.00326677	0.0776238	-1.88259
O35657	3.35375	15.3144	3.42754	0.00326778	0.0776238	-1.88288
Q8C6E0	2.61062	12.7975	3.42738	0.00326891	0.0776238	-1.88321
P97377	3.46159	12.7269	3.42692	0.00327212	0.0776238	-1.88414
Q8K3I9	2.65905	11.7304	3.42516	0.00328458	0.0776238	-1.88776
P97300	-0.902099	18.57	-3.42319	0.00329849	0.0776494	-1.89178
Q91WE2	4.79697	16.9468	3.41967	0.00332357	0.0776887	-1.89898
O08911	3.56927	12.9908	3.41936	0.00332585	0.0776887	-1.89963
Q91XD7	0.89063	16.8234	3.41337	0.00336895	0.0782119	-1.91187
Q8CGC7	0.705989	18.6725	3.41266	0.0033741	0.0782119	-1.91333
P49615	0.841053	15.7581	3.41037	0.00339079	0.0782988	-1.91802
Q8R105	3.33369	12.9627	3.40696	0.00341577	0.0785757	-1.925
Q8CIA5	2.25531	15.0714	3.40321	0.00344344	0.0788433	-1.93267
Q9DC04	3.62929	11.1136	3.40185	0.00345347	0.0788433	-1.93543
Q9JIF7	0.719186	17.7204	3.39926	0.00347275	0.078942	-1.94072
Q8BR63	1.01548	16.5758	3.39778	0.00348388	0.078942	-1.94377
Q8K0B2	3.80972	12.9861	3.39279	0.00352148	0.0794961	-1.95397
Q3UZA1	3.16543	13.8582	3.38875	0.00355218	0.079891	-1.96221
Q0VGB7	2.71522	14.2329	3.38301	0.00359627	0.0800239	-1.97394
Q9JK42	0.983906	15.9242	3.38289	0.00359726	0.0800239	-1.9742
O09012	0.639647	16.9529	3.38202	0.00360396	0.0800239	-1.97596
Q9D8V0	0.94434	17.7295	3.38098	0.00361206	0.0800239	-1.9781
Q9CQC6	0.832445	17.832	3.37941	0.00362422	0.0800239	-1.98129
Q04207	0.937694	17.0089	3.37329	0.00367223	0.080789	-1.99379
Q8VCE2	3.06206	12.7777	3.36395	0.00374669	0.0821284	-2.01286
Q9JJ59	3.12125	14.4053	3.36083	0.00377193	0.0823833	-2.01923
Q91ZP3	0.90364	18.1474	3.35897	0.00378704	0.0824158	-2.02303
Q80ZE4	1.92878	12.8126	3.35622	0.00380947	0.0826067	-2.02864
Q8VCH6	2.28297	15.498	3.35243	0.00384061	0.0829846	-2.03636
Q9R0E2	0.837371	16.2523	3.34329	0.00391684	0.0843305	-2.05502
Q9DAU1	4.07294	14.5506	3.3394	0.00394967	0.0847359	-2.06294
Q01965	2.50623	12.2352	3.33386	0.003997	0.0854482	-2.07425
Q9R008	0.61685	16.6026	3.32942	0.00403531	0.0859634	-2.0833
Q8JZY2	5.23032	12.117	3.32638	0.00406169	0.0860261	-2.08948
P10107	1.20069	21.9099	3.32581	0.00406669	0.0860261	-2.09065
P56873	2.53667	15.9424	3.32009	0.00411696	0.0860847	-2.1023
P48428	4.17666	13.9671	3.31992	0.0041184	0.0860847	-2.10263
Q9QXL2	3.25963	12.7527	3.31916	0.0041252	0.0860847	-2.1042
P59764	2.61628	11.5232	3.31819	0.00413376	0.0860847	-2.10616
P26262	1.37206	18.5609	3.31506	0.00416167	0.0860847	-2.11255
Q91VK1	0.84582	16.6085	3.3135	0.00417563	0.0860847	-2.11572
Q9QYI4	3.17008	13.497	3.31232	0.00418615	0.0860847	-2.11811
Q99P30	1.22729	19.2849	3.31171	0.00419167	0.0860847	-2.11936
P14602	0.771635	21.7738	3.31106	0.00419752	0.0860847	-2.12068
Q9DB27	1.13643	15.4739	3.3094	0.00421251	0.0861003	-2.12406
Q8R0S2	1.03609	15.2328	3.30609	0.00424251	0.0864216	-2.13079
O35127	2.76943	12.1005	3.30251	0.00427524	0.086796	-2.13808
Q9QWY8	1.7406	15.8151	3.29577	0.00433752	0.0877659	-2.15179
Q9EQ20	-0.892584	20.8656	-3.29306	0.00436289	0.0878901	-2.15732
Q8BIW1	0.898777	16.9691	3.29073	0.00438468	0.0878901	-2.16204
Q9D7X3	0.7367	19.0569	3.29046	0.00438724	0.0878901	-2.16259
P70426	3.03085	12.6503	3.28538	0.00443538	0.0885611	-2.17293
P98192	0.922521	17.9039	3.28139	0.00447351	0.0890287	-2.18104
Q8R015	3.21028	13.4759	3.27784	0.00450761	0.0894133	-2.18824
P61961	0.841015	17.7	3.26508	0.00463272	0.0913043	-2.21417
P34902	2.94567	11.3601	3.26504	0.00463313	0.0913043	-2.21425
A2AJI0	2.05024	16.2536	3.26048	0.00467859	0.0917302	-2.2235
Q8C729	0.917899	15.6592	3.25984	0.00468506	0.0917302	-2.22481
Q9DC29	0.995271	14.9931	3.25305	0.00475367	0.0925157	-2.23858
Q7TPE5	3.20779	11.3887	3.25285	0.00475576	0.0925157	-2.23899
Q68FE2	3.15434	11.429	3.24819	0.00480345	0.0931047	-2.24844
Q6PGH2	2.24697	16.5541	3.24674	0.00481846	0.0931047	-2.25139
Q9CQU3	0.831749	16.0705	3.24452	0.00484146	0.0931047	-2.2559
Q9JHK4	0.855389	16.3559	3.24392	0.0048476	0.0931047	-2.2571
Q3TJZ6	0.852188	15.9882	3.23463	0.0049451	0.0946768	-2.27594
Q9CR20	0.991484	17.0766	3.23224	0.00497042	0.0948246	-2.28077
Q8VCI0	0.860952	17.2315	3.23095	0.00498417	0.0948246	-2.28339
Q505D7	2.92527	14.4758	3.22832	0.00501238	0.0949291	-2.28873
Q3TWL2	2.87098	14.2175	3.22751	0.00502104	0.0949291	-2.29036
Q8R550	1.25906	16.3133	3.22345	0.00506493	0.0954606	-2.29859
Q61586	0.860426	17.5263	3.22025	0.00509969	0.0956767	-2.30506
Q8CI08	2.05547	14.7041	3.21949	0.00510803	0.0956767	-2.30661
Q8R3E3	0.831168	16.8594	3.21621	0.00514403	0.0960537	-2.31325
Q922K7	0.828617	14.5227	3.21166	0.00519441	0.0963863	-2.32247
Q91WG5	-3.24254	12.5448	-3.20789	0.00523644	0.0963863	-2.33009
B8JK39	4.29227	13.0149	3.20731	0.00524291	0.0963863	-2.33125
Q5SXY1	3.90451	14.1867	3.20692	0.00524735	0.0963863	-2.33205
Q8BMB3	3.12283	9.78574	3.20602	0.00525743	0.0963863	-2.33387
Q6IRU2	1.15335	18.8013	3.20602	0.00525744	0.0963863	-2.33387
Q91YR9	0.890725	17.0084	3.20353	0.0052855	0.0966081	-2.3389
P70345	3.52336	13.2186	3.19768	0.00535215	0.0975317	-2.35075
O08528	-0.718085	18.2894	-3.19073	0.00543221	0.0986932	-2.36478
Q62468	-3.88924	10.7689	-3.18245	0.00552926	0.100156	-2.38151
Q504P2	3.60221	11.1948	3.1717	0.0056579	0.10218	-2.40323
Q9R112	-0.674199	18.2655	-3.16908	0.00568961	0.102447	-2.40851
Q7TT23	2.78239	12.8201	3.16199	0.00577651	0.103002	-2.42282
Q3U492	4.38433	15.1472	3.16187	0.00577793	0.103002	-2.42306
Q8K0D7	0.992421	15.5503	3.16169	0.00578017	0.103002	-2.42342
Q8R3H7	3.49975	13.8632	3.16101	0.00578857	0.103002	-2.42479
Q05816	0.845452	22.3257	3.15799	0.00582608	0.103132	-2.43089
Q812E0	2.89641	12.4983	3.15768	0.00582993	0.103132	-2.43151
Q60780	2.64032	12.0232	3.1462	0.00597465	0.105209	-2.45466
Q2TBA3	0.82073	16.0218	3.14561	0.00598212	0.105209	-2.45583
Q9JJZ4	1.31731	15.5957	3.14237	0.00602371	0.105633	-2.46237
Q9D0I4	0.897894	16.746	3.13967	0.00605851	0.105936	-2.46781
O88856	2.93391	14.7306	3.13395	0.00613289	0.106651	-2.47932
Q91YP2	0.871965	18.6271	3.13382	0.00613465	0.106651	-2.47959
Q924D0	3.25051	14.4714	3.12802	0.00621105	0.107221	-2.49126
Q8C6I2	3.25121	10.4971	3.12733	0.0062202	0.107221	-2.49265
Q8CGF1	0.787306	15.9784	3.1273	0.00622056	0.107221	-2.4927
Q9QXY6	0.650775	18.8206	3.12493	0.00625203	0.107457	-2.49746
P97298	0.92307	17.2116	3.1219	0.00629266	0.107482	-2.50357
Q8K297	1.04012	18.3988	3.12039	0.00631297	0.107482	-2.50661
Q9Z1B3	1.93862	15.1008	3.11822	0.00634217	0.107482	-2.51096
Q7TMY7	1.30038	15.727	3.1175	0.00635199	0.107482	-2.51242
Q99LN9	0.70946	14.3556	3.1169	0.00636001	0.107482	-2.51361
O88738	0.68	16.9028	3.1169	0.00636007	0.107482	-2.51361
Q91VX2	2.27336	14.6636	3.11176	0.00643022	0.108365	-2.52395
O70161	3.30826	14.0854	3.10031	0.006589	0.110732	-2.54694
P11835	1.50697	17.6073	3.09352	0.00668504	0.112035	-2.56057
Q9CQX8	3.18425	14.7097	3.09112	0.00671927	0.112297	-2.56538
Q80UY1	3.31027	14.1399	3.08789	0.00676578	0.11255	-2.57188
P36423	1.86933	14.8791	3.08748	0.00677159	0.11255	-2.57269
P62843	3.23798	15.3654	3.08506	0.0068066	0.112822	-2.57754
Q9CR59	3.75369	11.2691	3.07991	0.00688164	0.113136	-2.58786
Q8CFI0	0.703541	19.1401	3.08228	0.0068471	0.113136	-2.58313
Q9QZM0	0.71103	17.718	3.08084	0.00686806	0.113136	-2.58601
O70469	4.06161	13.6909	3.07658	0.00693071	0.113342	-2.59455
Q9DBP5	0.847726	19.9363	3.07583	0.00694169	0.113342	-2.59604
P35980	0.761043	19.3443	3.07524	0.00695042	0.113342	-2.59723
Q8BH24	0.786497	18.0229	3.07349	0.0069763	0.113459	-2.60073
P03976	2.56119	14.2871	3.07098	0.00701379	0.113762	-2.60577
Q8VHE0	0.782479	16.3451	3.06599	0.00708855	0.114668	-2.61575
O35623	3.03051	12.8237	3.06371	0.00712305	0.114735	-2.62032
P07091	1.42003	18.4814	3.06321	0.00713066	0.114735	-2.62132
Q8BLF1	3.18818	15.4053	3.05831	0.00720544	0.115631	-2.63114
Q9D4H8	0.704336	15.2629	3.05542	0.00724988	0.115839	-2.63692
Q80SY6	2.672	10.3953	3.05497	0.00725669	0.115839	-2.6378
Q9JKY5	3.82915	14.0177	3.05247	0.00729544	0.116051	-2.64281
Q8R180	0.685307	17.1229	3.05164	0.00730831	0.116051	-2.64447
Q811I0	1.82537	14.7006	3.04552	0.00740406	0.117263	-2.65671
Q8BM55	2.03699	14.1162	3.04179	0.00746301	0.117438	-2.66417
Q8R3F5	-3.50875	13.9213	-3.03981	0.00749445	0.117438	-2.66812
Q64455	2.7048	12.0217	3.03966	0.00749688	0.117438	-2.66842
Q9DB30	4.94943	13.3461	3.03914	0.00750518	0.117438	-2.66946
Q9WV60	0.789517	17.1588	3.0387	0.00751214	0.117438	-2.67034
Q9Z1Z0	0.658891	19.4495	3.03469	0.00757636	0.118136	-2.67834
Q6PAT0	2.72319	10.5589	3.02857	0.0076755	0.119322	-2.69055
Q8K2F8	3.36123	13.607	3.02757	0.00769181	0.119322	-2.69255
O09164	1.01001	19.9255	3.02347	0.00775922	0.119678	-2.70075
Q9CQ71	3.27956	13.2096	3.02309	0.00776546	0.119678	-2.7015
Q6PGC1	0.695802	15.2589	3.0213	0.00779499	0.119678	-2.70507
P25446	6.24238	12.0297	3.02089	0.00780179	0.119678	-2.70589
Q9EQJ0	3.70855	11.1346	3.02017	0.00781368	0.119678	-2.70732
Q9D1E8	2.74846	13.4179	3.01657	0.00787372	0.119956	-2.71451
P28650	2.24299	13.8484	3.01648	0.00787508	0.119956	-2.71467
Q91W92	0.662953	16.7337	3.01551	0.00789131	0.119956	-2.7166
Q9R111	0.673813	20.9714	3.01364	0.00792275	0.120132	-2.72034
Q8BMJ3	3.24038	15.5243	3.01189	0.0079522	0.120277	-2.72382
P57080	1.70231	13.9518	3.00905	0.00800029	0.120669	-2.72948
Q99N11	2.94569	11.432	3.0079	0.00801994	0.120669	-2.73179
Q8BHG1	0.570948	17.6071	3.00684	0.00803796	0.120669	-2.73389
Q8C4Q6	2.01263	14.8503	3.00119	0.00813485	0.121613	-2.74514
P24472	-1.19556	17.1612	-3.00083	0.00814105	0.121613	-2.74586
P48036	0.839768	23.4575	2.99524	0.00823819	0.122761	-2.75699
Q9JI10	2.52739	13.5594	2.9936	0.00826679	0.122885	-2.76024
E9Q8D0	2.17172	10.3328	2.98765	0.00837173	0.123716	-2.77208
Q8R5A6	0.829127	15.4602	2.98733	0.00837748	0.123716	-2.77273
P62700	2.79111	11.3555	2.98696	0.00838405	0.123716	-2.77346
Q8BPU7	1.96266	15.1032	2.98432	0.00843095	0.124105	-2.77869
Q8VE09	4.08925	13.8195	2.98312	0.00845253	0.124121	-2.78109
Q61419	2.99204	11.1943	2.98175	0.00847712	0.124158	-2.78382
Q3UH93	0.811237	15.9017	2.98065	0.00849691	0.124158	-2.786
Q91YX0	2.37139	13.2404	2.97955	0.00851659	0.124158	-2.78817
P13864	4.08876	13.6201	2.97288	0.00863776	0.124421	-2.80142
Q9D7M1	3.05187	10.7702	2.97262	0.00864254	0.124421	-2.80194
P50518	1.3697	17.0872	2.97042	0.00868294	0.124421	-2.80631
P50285	-0.766127	18.4981	-2.9699	0.00869261	0.124421	-2.80736
Q8CI04	1.58338	14.8549	2.96959	0.00869831	0.124421	-2.80797
O54962	3.04562	12.0604	2.9691	0.00870725	0.124421	-2.80893
P19253	1.0812	18.3059	2.96878	0.00871315	0.124421	-2.80957
Q9D7S9	2.34007	14.7347	2.96842	0.00871975	0.124421	-2.81028
Q01102	2.30301	14.6907	2.96842	0.00871978	0.124421	-2.81028
Q8R3D1	0.654731	16.2261	2.96407	0.00880052	0.125278	-2.81892
P13597	-0.93432	16.739	-2.95801	0.00891403	0.126596	-2.83093
Q8C147	1.70746	15.9766	2.9532	0.00900516	0.127308	-2.84046
Q8BXK9	0.795332	15.2496	2.95146	0.0090385	0.127308	-2.84393
P28843	-1.0713	17.4474	-2.95116	0.00904423	0.127308	-2.84452
O88783	2.99284	13.1705	2.95094	0.00904832	0.127308	-2.84494
O88507	2.85716	13.9158	2.94827	0.00909963	0.127733	-2.85024
O70423	-0.701418	23.018	-2.94582	0.0091469	0.128041	-2.8551
D0QMC3	3.45407	13.0429	2.94494	0.0091639	0.128041	-2.85683
Q64345	3.61389	11.6563	2.94207	0.00921964	0.128523	-2.86251
Q8CEC0	2.38862	14.4702	2.93733	0.00931263	0.12952	-2.87191
P61255	1.15597	18.2975	2.93384	0.00938148	0.129959	-2.87881
Q8BUN5	2.0876	13.8642	2.93321	0.00939401	0.129959	-2.88006
Q9QUR7	0.806906	17.5876	2.93246	0.00940894	0.129959	-2.88154
Q99JH8	2.71063	12.7674	2.93128	0.00943238	0.129959	-2.88387
Q61553	0.663248	17.6824	2.9299	0.0094599	0.129959	-2.8866
Q6PHN7	2.8321	11.4732	2.92924	0.00947301	0.129959	-2.8879
Q9DCH4	0.703639	17.3505	2.92701	0.00951775	0.130277	-2.89231
B5X0G2	-2.12713	8.49638	-2.92363	0.00958607	0.130916	-2.899
Q9Z1G4	0.675008	18.2118	2.91716	0.00971789	0.132068	-2.91178
Q91ZR2	0.748174	16.9658	2.91697	0.00972185	0.132068	-2.91216
Q9CXU9	2.45806	14.0897	2.91595	0.00974264	0.132068	-2.91416
Q8BVW3	2.64946	15.1493	2.91436	0.00977544	0.132068	-2.9173
Q8VCS3	2.86393	12.8213	2.91416	0.0097796	0.132068	-2.9177
Q8BTY1	1.4754	15.0575	2.91137	0.00983726	0.132386	-2.9232
P11928	2.9269	11.9239	2.91091	0.00984688	0.132386	-2.92411
Q8R307	0.826703	16.9923	2.90664	0.00993589	0.133182	-2.93253
Q8R2R9	3.46073	14.0034	2.90582	0.00995309	0.133182	-2.93414
Q9ET01	-0.76722	17.6426	-2.90492	0.00997213	0.133182	-2.93593
Q91YW3	0.866945	17.2917	2.90322	0.0100079	0.133365	-2.93928
Q8BHL8	0.770437	17.2338	2.89862	0.0101054	0.134162	-2.94835
Q61595	0.824299	14.7103	2.89579	0.010166	0.134162	-2.95393
O88597	1.86031	15.418	2.89556	0.0101708	0.134162	-2.95437
Q99JT9	3.13811	13.8694	2.89556	0.010171	0.134162	-2.95439
Q61160	4.38677	13.8284	2.8952	0.0101786	0.134162	-2.95509
Q9WTR2	0.518886	14.5673	2.89012	0.0102881	0.135311	-2.96509
Q69Z99	3.3714	11.4987	2.88822	0.0103294	0.13556	-2.96884
Q07968	0.766209	16.4652	2.88673	0.0103618	0.135691	-2.97176
Q80WQ2	0.659858	16.4836	2.88353	0.0104321	0.13609	-2.97808
Q9CPR1	3.75311	14.9572	2.88234	0.0104581	0.13609	-2.9804
O08547	0.894933	18.3104	2.88227	0.0104598	0.13609	-2.98055
Q9JJ28	0.939429	16.2833	2.88109	0.0104858	0.136136	-2.98287
P30355	2.32352	17.811	2.8734	0.0106569	0.137981	-2.99799
Q99JY3	0.717081	17.4355	2.87266	0.0106736	0.137981	-2.99945
P30412	0.693959	18.3352	2.87043	0.0107237	0.137987	-3.00382
Q3TA59	2.81414	12.6438	2.86998	0.010734	0.137987	-3.00472
O88845	2.60262	13.3683	2.8696	0.0107424	0.137987	-3.00545
Q8R010	0.731329	16.5056	2.86833	0.0107713	0.138065	-3.00796
Q6P9Q4	1.21514	15.3963	2.86339	0.0108837	0.138596	-3.01765
Q9QUJ7	1.99098	15.1875	2.86248	0.0109047	0.138596	-3.01944
Q9ER88	2.6162	14.8629	2.86178	0.0109206	0.138596	-3.02081
Q5SVR0	0.566931	17.8263	2.86112	0.0109358	0.138596	-3.02211
Q61592	3.40662	11.0901	2.86097	0.0109394	0.138596	-3.02241
P28658	0.582326	15.921	2.85991	0.0109637	0.138596	-3.02448
P53564	2.99543	12.8446	2.85888	0.0109875	0.138596	-3.02651
Q9D6Y9	-0.495945	19.1661	-2.85851	0.0109961	0.138596	-3.02723
Q9DBH5	0.573048	20.349	2.85741	0.0110215	0.138629	-3.02939
P01898	0.620602	17.823	2.85256	0.0111345	0.139562	-3.0389
Q6X893	-0.571866	16.0086	-2.85224	0.0111419	0.139562	-3.03953
Q91X51	2.79117	13.8653	2.84984	0.0111984	0.139979	-3.04424
O08800	1.16896	17.668	2.84885	0.0112217	0.139982	-3.04618
P54227	1.40122	15.4788	2.84623	0.0112836	0.140213	-3.05131
Q91WP0	3.46807	15.5031	2.8461	0.0112866	0.140213	-3.05156
Q8CIN4	0.656291	18.2825	2.8424	0.0113748	0.140721	-3.05882
Q3TYX2	2.21397	15.7114	2.84236	0.0113757	0.140721	-3.05889
Q8VCZ2	3.21722	12.3435	2.84146	0.0113972	0.140721	-3.06066
Q5EBG8	3.24138	11.7032	2.84042	0.0114221	0.14074	-3.06269
P99029	0.827613	21.2873	2.83829	0.0114733	0.141084	-3.06686
Q9CW42	0.84081	17.4202	2.83725	0.0114985	0.141107	-3.0689
Q9EPU0	0.542246	17.9479	2.83606	0.0115273	0.141174	-3.07123
Q9CRC9	2.42799	15.0504	2.83086	0.0116537	0.142434	-3.0814
Q8CH77	3.46969	11.1332	2.82824	0.0117181	0.142932	-3.08653
Q8VCT4	-0.835287	22.5561	-2.82364	0.0118316	0.143313	-3.09551
Q9D0C4	3.08971	13.0711	2.82342	0.0118371	0.143313	-3.09595
P62075	2.0741	15.7479	2.82159	0.0118827	0.143313	-3.09953
Q6ZPY7	3.1967	11.4063	2.82151	0.0118846	0.143313	-3.09968
O70571	2.79555	14.3547	2.82129	0.0118902	0.143313	-3.10012
O35405	1.3321	17.253	2.82044	0.0119113	0.143313	-3.10177
Q8K2B3	-0.619657	18.5003	-2.82011	0.0119196	0.143313	-3.10242
Q9Z2X8	3.56043	12.4486	2.81904	0.0119464	0.143313	-3.10451
Q9CQT5	3.49795	14.8291	2.81716	0.0119936	0.143313	-3.10818
E9Q3C1	2.88789	14.2252	2.81674	0.0120042	0.143313	-3.109
Q9D8X2	3.00189	13.4995	2.81651	0.0120099	0.143313	-3.10945
Q99J36	2.53808	13.6996	2.81551	0.0120351	0.143331	-3.1114
Q9JHI5	-0.733866	20.4768	-2.81289	0.0121014	0.143838	-3.11652
Q8CIE6	0.659173	19.7616	2.80911	0.0121977	0.144699	-3.1239
Q8CF66	0.712414	17.9167	2.80794	0.0122275	0.144768	-3.12617
P61080	4.19458	13.4197	2.80391	0.0123314	0.145387	-3.13404
Q9Z120	3.59665	10.5804	2.80386	0.0123327	0.145387	-3.13414
Q2YDW2	2.29456	14.3023	2.80296	0.0123558	0.145387	-3.13589
Q3U487	0.716834	16.2589	2.80081	0.0124117	0.145387	-3.14009
Q62077	0.583661	15.867	2.80066	0.0124155	0.145387	-3.14037
Q9CYN9	3.20674	12.3232	2.80034	0.012424	0.145387	-3.141
Q7TQI3	0.679863	18.4385	2.78936	0.0127127	0.148374	-3.16238
Q6ZWX6	0.702539	18.7496	2.78878	0.0127283	0.148374	-3.16352
P16406	-0.790119	19.2695	-2.78583	0.0128069	0.148525	-3.16925
Q6ZQ73	1.2775	16.7935	2.78557	0.0128141	0.148525	-3.16977
Q00623	1.02319	24.1074	2.78551	0.0128157	0.148525	-3.16988
Q8BWY4	-0.914673	14.3867	-2.78462	0.0128394	0.148525	-3.1716
Q9QXA5	2.25443	15.5785	2.78337	0.0128731	0.14863	-3.17404
Q9D964	2.83594	13.2599	2.77936	0.0129817	0.149371	-3.18185
Q8JZR0	0.743551	23.023	2.77804	0.0130173	0.149371	-3.1844
Q61035	0.584939	18.7805	2.77739	0.013035	0.149371	-3.18566
P19001	-1.15395	17.7475	-2.77653	0.0130587	0.149371	-3.18735
P61458	0.952018	18.3884	2.77581	0.0130782	0.149371	-3.18873
P18337	3.15699	11.9795	2.77555	0.0130854	0.149371	-3.18924
P14847	2.48926	14.9144	2.77091	0.013213	0.150543	-3.19826
Q9Z1M4	2.36988	11.4691	2.76982	0.0132429	0.150601	-3.20037
Q6PIU9	0.579332	15.809	2.76868	0.0132745	0.150642	-3.20258
Q8BVE3	0.714093	18.0395	2.76733	0.0133122	0.150642	-3.20521
O70348	2.21016	9.85468	2.767	0.0133212	0.150642	-3.20584
B1AXH1	5.94511	14.235	2.76375	0.013412	0.151108	-3.21215
P58059	2.8865	12.5367	2.76374	0.0134124	0.151108	-3.21218
A2RSJ4	2.02819	13.6464	2.76244	0.0134486	0.151235	-3.21469
P62814	0.956702	19.5925	2.76075	0.0134962	0.151412	-3.21797
P27808	3.59861	11.2406	2.76011	0.0135145	0.151412	-3.21922
Q8K0D0	3.20861	13.3405	2.75491	0.013662	0.152782	-3.2293
P97369	1.3537	14.477	2.75159	0.0137567	0.153346	-3.23572
Q9JI46	1.02623	16.7929	2.74972	0.0138106	0.153346	-3.23935
Q6P9S0	2.54709	11.6864	2.74924	0.0138245	0.153346	-3.24028
Q8BJ64	-1.03733	18.0289	-2.74899	0.0138318	0.153346	-3.24077
Q8BMP6	1.40743	16.3025	2.74873	0.0138392	0.153346	-3.24127
O08848	2.21165	14.1109	2.74768	0.0138695	0.153401	-3.2433
Q80YR4	3.30786	11.9592	2.74671	0.0138977	0.153432	-3.24518
Q99L45	0.651333	16.9035	2.73963	0.0141043	0.15543	-3.25888
P01758	0.765953	9.49476	2.73581	0.0142171	0.156388	-3.26627
P53026	0.901363	17.2523	2.73449	0.0142563	0.156535	-3.26882
Q9CQE5	2.89448	12.8666	2.73256	0.0143137	0.156744	-3.27255
Q8BH47	1.94285	13.8658	2.73211	0.0143271	0.156744	-3.27342
Q8VDH1	1.11387	14.2869	2.73038	0.0143789	0.157026	-3.27676
P03953	-1.08289	18.0872	-2.72894	0.0144221	0.157214	-3.27954
Q99KK1	3.79903	12.3829	2.72755	0.0144639	0.157386	-3.28223
Q99JN2	2.5159	14.3117	2.72516	0.014536	0.157887	-3.28684
G5E829	-0.655962	18.7069	-2.72137	0.0146512	0.158333	-3.29416
Q99LC3	-0.694795	18.0994	-2.72128	0.0146538	0.158333	-3.29432
P62900	0.684647	18.7364	2.72123	0.0146556	0.158333	-3.29443
Q9CPR4	0.98928	17.9594	2.71674	0.0147929	0.159445	-3.30308
Q2TPA8	0.618622	18.6667	2.71523	0.0148395	0.159445	-3.30599
P00329	-0.692771	20.7065	-2.71299	0.0149089	0.159445	-3.31031
Q9DC50	2.54057	14.1881	2.71167	0.0149498	0.159445	-3.31285
P39039	2.01252	15.874	2.71153	0.0149544	0.159445	-3.31314
Q9JHU2	0.570737	18.0484	2.71127	0.0149624	0.159445	-3.31363
Q8BYH7	0.70289	17.03	2.71071	0.0149797	0.159445	-3.31471
Q8BZT9	3.26208	11.2611	2.71024	0.0149943	0.159445	-3.31561
O08705	-0.745286	18.6226	-2.70968	0.015012	0.159445	-3.3167
Q8VD75	0.616124	17.7704	2.70935	0.0150221	0.159445	-3.31732
Q8BYC6	2.62859	14.6008	2.70814	0.0150602	0.15956	-3.31967
Q9CQF0	3.40078	11.6017	2.70644	0.0151132	0.15956	-3.32292
Q9CQN7	2.41646	12.3062	2.70606	0.0151252	0.15956	-3.32366
Q09014	2.70476	12.6858	2.70564	0.0151385	0.15956	-3.32447
P01674	-3.27512	12.1695	-2.70296	0.0152231	0.160099	-3.32963
Q91WB4	2.58381	15.0967	2.70117	0.01528	0.160099	-3.33309
P70288	0.907091	15.0759	2.70075	0.0152931	0.160099	-3.33388
P36993	-0.715322	16.6762	-2.70068	0.0152954	0.160099	-3.33402
Q64514	0.612468	17.4382	2.69742	0.0153994	0.160816	-3.34029
A2AQ19	3.99167	12.6998	2.69605	0.0154433	0.160816	-3.34293
Q8QZY1	0.621688	17.2483	2.69597	0.0154458	0.160816	-3.34308
P32233	0.718554	16.1793	2.69521	0.0154702	0.160816	-3.34454
Q8VEE1	0.809848	15.6723	2.69418	0.0155034	0.160885	-3.34653
Q9CR67	0.781916	17.9641	2.69326	0.0155328	0.160914	-3.34828
Q811J3	2.52932	12.1165	2.69117	0.0156005	0.161339	-3.3523
P62274	1.66573	16.1637	2.68961	0.0156512	0.161343	-3.3553
Q7TQ95	0.626651	17.1423	2.68951	0.0156542	0.161343	-3.35549
Q9CY27	0.748547	20.3537	2.68772	0.0157126	0.161669	-3.35893
Q78JW9	3.12802	15.0939	2.68661	0.015749	0.161769	-3.36107
Q99LI8	0.604916	17.816	2.68571	0.0157784	0.161795	-3.36279
Q9D1M7	3.28429	12.8806	2.68417	0.0158288	0.161817	-3.36574
Q9D8V7	2.40331	13.5281	2.68374	0.0158431	0.161817	-3.36658
Q9CX30	0.820954	15.9048	2.68318	0.0158614	0.161817	-3.36765
Q921G6	1.92646	15.0597	2.68132	0.0159228	0.161817	-3.37122
P62874	-0.640428	19.5215	-2.68122	0.0159262	0.161817	-3.37142
P31532	1.51789	15.9735	2.68021	0.0159593	0.161817	-3.37334
Q9D273	0.996731	16.2407	2.67965	0.0159781	0.161817	-3.37443
Q99N87	3.1655	13.3394	2.67915	0.0159945	0.161817	-3.37538
Q9EPK6	1.11372	14.3528	2.67549	0.0161165	0.162779	-3.3824
A3KGB4	1.51075	13.94	2.67354	0.0161818	0.162899	-3.38614
P70362	0.54074	18.3053	2.67218	0.0162274	0.162899	-3.38875
O35566	-1.10722	16.2182	-2.67143	0.0162527	0.162899	-3.39018
Q91W86	0.628046	17.2223	2.67115	0.0162622	0.162899	-3.39072
P62340	1.75232	11.3923	2.67112	0.016263	0.162899	-3.39077
A2AKG8	0.627926	14.366	2.66683	0.0164083	0.163565	-3.39899
Q9CQV1	3.08255	13.368	2.66654	0.0164181	0.163565	-3.39954
O08992	1.33139	15.0767	2.66652	0.0164189	0.163565	-3.39959
Q3TC93	1.23638	16.1068	2.66512	0.0164668	0.163565	-3.40228
Q9R061	0.697956	17.0422	2.66399	0.016505	0.163565	-3.40442
Q9CXI5	2.39198	14.67	2.66398	0.0165054	0.163565	-3.40444
Q9CZ28	2.90824	10.9435	2.66315	0.0165339	0.163565	-3.40604
B9EKI3	2.277	12.4221	2.66172	0.0165829	0.163565	-3.40877
P50171	-0.54879	18.6076	-2.66169	0.0165841	0.163565	-3.40884
Q91XD6	0.604306	16.9233	2.6608	0.0166145	0.163565	-3.41053
Q9QYE6	0.701126	14.2074	2.66044	0.0166269	0.163565	-3.41122
Q06138	0.811143	15.1811	2.65359	0.0168646	0.165634	-3.42433
Q80U87	0.853425	16.5345	2.65265	0.0168973	0.165687	-3.42612
E9Q4Z2	-0.868793	16.1433	-2.64906	0.0170234	0.166452	-3.43299
Q9DCC7	0.886194	14.6196	2.64863	0.0170383	0.166452	-3.43379
Q8VC28	0.895509	17.9237	2.64592	0.0171341	0.166452	-3.43897
P62754	0.732225	19.1479	2.64568	0.0171428	0.166452	-3.43944
Q9EQ61	2.80434	12.8161	2.64504	0.0171653	0.166452	-3.44065
Q03963	2.66279	13.142	2.64377	0.0172107	0.166452	-3.44309
Q8BHB9	-2.41444	12.3629	-2.64354	0.0172189	0.166452	-3.44353
P70451	4.16262	12.0058	2.64253	0.0172547	0.166452	-3.44544
Q3UMB9	1.10893	15.0388	2.64242	0.0172588	0.166452	-3.44566
P97797	2.84552	13.6449	2.64213	0.0172692	0.166452	-3.44622
Q6Y685	0.571474	17.0874	2.64155	0.0172899	0.166452	-3.44732
Q9CQ86	0.703845	17.4221	2.64085	0.0173149	0.166452	-3.44866
Q9CR60	0.701383	17.5454	2.63993	0.0173478	0.166452	-3.45041
Q9EQN3	1.83973	15.2462	2.63926	0.0173716	0.166452	-3.45167
Q8BHL5	0.717654	16.6311	2.63876	0.0173896	0.166452	-3.45263
Q6P4T0	2.73583	12.0576	2.63804	0.0174155	0.166452	-3.45401
Q9JI48	3.2308	12.5927	2.63292	0.0176008	0.167958	-3.46377
Q921H9	2.94823	13.4694	2.62904	0.0177425	0.168769	-3.47116
Q9Z0K8	-0.762561	14.9865	-2.6285	0.0177623	0.168769	-3.47219
Q91ZV4	-1.12106	15.522	-2.6283	0.0177696	0.168769	-3.47257
Q9WUD8	2.31412	14.9674	2.62664	0.0178307	0.169084	-3.47574
Q9D1I5	2.92612	13.6175	2.62494	0.0178933	0.169412	-3.47897
P62908	0.570023	20.7599	2.62394	0.0179304	0.169498	-3.48088
Q9R060	2.0009	14.9755	2.62291	0.0179682	0.169591	-3.48282
Q6P6J9	1.43636	15.1954	2.6214	0.0180243	0.169803	-3.48569
Q8K4L0	3.68914	12.2908	2.62031	0.0180651	0.169803	-3.48778
Q5FWK3	0.767596	19.717	2.61975	0.0180859	0.169803	-3.48884
Q80VJ2	1.86837	15.5152	2.61929	0.018103	0.169803	-3.48971
Q8BP56	0.642938	16.7112	2.61706	0.0181864	0.170196	-3.49395
Q9D2Z4	2.79861	12.5109	2.61667	0.0182012	0.170196	-3.49469
Q9ET26	2.10834	14.0367	2.61545	0.0182469	0.170361	-3.49701
O35166	1.65298	14.731	2.6137	0.0183131	0.170571	-3.50034
Q61646	1.09752	20.8295	2.61336	0.0183258	0.170571	-3.50098
P45376	0.559801	21.8044	2.61082	0.0184221	0.171204	-3.50581
Q61166	0.685221	17.9693	2.60923	0.0184826	0.171345	-3.50883
Q9Z1G3	1.01108	16.4789	2.60893	0.0184939	0.171345	-3.5094
P56564	-1.15378	15.0078	-2.60686	0.0185732	0.171764	-3.51334
Q9CWQ0	2.73882	12.0232	2.60587	0.0186109	0.171764	-3.5152
Q9CX13	2.81779	12.5318	2.60497	0.0186457	0.171764	-3.51692
Q6NXM2	2.76176	11.556	2.60455	0.0186618	0.171764	-3.51772
Q3TIR3	0.565011	16.4677	2.60364	0.0186965	0.171764	-3.51943
Q3UZ39	1.98019	14.1441	2.60294	0.0187235	0.171764	-3.52076
O55029	0.575409	20.2012	2.60257	0.0187379	0.171764	-3.52146
Q64471	-0.944094	17.6362	-2.6007	0.0188101	0.171909	-3.52501
Q9JJL3	2.81766	11.056	2.60069	0.0188106	0.171909	-3.52503
Q80TV8	1.02003	17.267	2.5994	0.0188607	0.172107	-3.52748
Q99JR8	2.65768	11.8296	2.59688	0.0189588	0.172711	-3.53225
Q8K1R7	0.529536	16.667	2.59623	0.0189839	0.172711	-3.53348
Q9Z266	1.95212	14.2725	2.59522	0.0190238	0.172814	-3.5354
P30416	-0.647436	16.1602	-2.594	0.0190714	0.172953	-3.53771
Q9CR41	2.99623	11.0414	2.59337	0.0190963	0.172953	-3.5389
Q8R121	0.718542	15.3972	2.58796	0.01931	0.174277	-3.54915
Q9JHW9	1.72049	14.6301	2.58724	0.0193385	0.174277	-3.5505
A2AQ07	3.9704	12.8749	2.58534	0.0194144	0.174277	-3.55411
P30933	-5.71075	13.9049	-2.58455	0.0194457	0.174277	-3.55559
P97468	-0.943155	16.0064	-2.58399	0.0194684	0.174277	-3.55666
Q9JJE4	3.03897	10.9385	2.58372	0.0194792	0.174277	-3.55717
P0C8K7	-1.01758	17.3259	-2.58316	0.0195014	0.174277	-3.55822
Q9DCC4	-0.579567	16.7854	-2.58284	0.0195144	0.174277	-3.55883
O89020	1.00442	16.923	2.58275	0.019518	0.174277	-3.559
Q8VEH6	1.89238	14.9779	2.58244	0.0195305	0.174277	-3.55959
O89079	0.642763	16.781	2.58012	0.0196237	0.17485	-3.56397
Q3TDN2	0.488951	17.1153	2.57764	0.019724	0.175074	-3.56866
Q9QY24	3.17563	11.4888	2.57738	0.0197344	0.175074	-3.56914
Q6P9R4	3.18793	11.6154	2.57736	0.0197356	0.175074	-3.56919
E9Q3S4	0.983608	19.7401	2.57451	0.0198512	0.175842	-3.57457
Q64356	-4.5397	11.9377	-2.57294	0.0199153	0.176072	-3.57753
Q62264	-0.980881	17.9561	-2.57229	0.0199422	0.176072	-3.57877
Q921H8	0.616919	20.9949	2.57174	0.0199645	0.176072	-3.5798
Q91X21	1.70142	13.9008	2.56664	0.0201747	0.177667	-3.58942
Q80YE7	5.28814	17.4577	2.5658	0.0202094	0.177714	-3.591
Q9D1K7	-0.657393	16.3539	-2.56296	0.0203275	0.178352	-3.59635
Q99J47	0.679159	17.3841	2.56264	0.0203409	0.178352	-3.59696
Q8C1E7	0.719037	18.8338	2.56108	0.0204063	0.178666	-3.59991
A2AVZ9	0.95284	15.6962	2.55741	0.0205604	0.178979	-3.60682
Q62419	1.18324	17.281	2.55923	0.0204835	0.178979	-3.60338
P28741	3.15267	13.2602	2.55851	0.0205141	0.178979	-3.60474
Q9CR64	0.760534	17.9172	2.55784	0.0205423	0.178979	-3.60601
Q08879	-0.703765	16.5368	-2.55562	0.0206359	0.179146	-3.61018
P47911	0.861722	20.6569	2.55497	0.0206634	0.179146	-3.6114
Q80VP1	0.623001	16.417	2.55426	0.0206935	0.179146	-3.61274
P70182	2.65764	10.4856	2.55388	0.0207097	0.179146	-3.61346
Q8BU27	1.60552	13.7509	2.55287	0.0207524	0.179146	-3.61535
A2ALW5	2.16416	11.3755	2.55276	0.0207572	0.179146	-3.61556
Q9DBX2	2.39969	14.3467	2.55002	0.0208742	0.179752	-3.62072
Q91YT0	-0.510755	19.5298	-2.54972	0.0208869	0.179752	-3.62128
P97484	2.54211	12.82	2.54736	0.0209881	0.180366	-3.62572
Q91XB7	2.05012	15.4722	2.54667	0.0210181	0.180368	-3.62703
Q03147	2.78075	13.0063	2.54596	0.0210485	0.180373	-3.62835
Q8K4D3	2.56217	11.628	2.54407	0.02113	0.180728	-3.6319
Q62277	3.14595	13.1395	2.54362	0.0211496	0.180728	-3.63275
Q9WU42	2.75076	12.0215	2.54258	0.0211948	0.180858	-3.63471
Q9CQW2	0.607371	17.7777	2.53929	0.0213377	0.181439	-3.64087
Q4VC33	2.3597	13.8665	2.53923	0.0213406	0.181439	-3.641
Q99LP6	0.704646	17.7026	2.53895	0.0213528	0.181439	-3.64152
P35822	3.01001	17.3322	2.53774	0.0214058	0.181616	-3.64379
Q8CES0	2.93208	13.8812	2.5371	0.0214337	0.181616	-3.64499
Q78PY7	0.529683	18.795	2.53625	0.0214709	0.181677	-3.64658
Q9D115	2.47083	11.5797	2.53189	0.0216634	0.182801	-3.65476
Q8BHD7	0.821234	16.4926	2.53187	0.0216642	0.182801	-3.6548
Q9CQ89	0.688468	18.1981	2.5294	0.0217738	0.18303	-3.65942
P57759	0.704989	20.3954	2.52873	0.0218039	0.18303	-3.66069
Q9QXZ0	0.833296	15.7447	2.52871	0.0218047	0.18303	-3.66072
Q8CCJ3	0.509962	16.4083	2.52854	0.0218123	0.18303	-3.66104
Q3TDK6	2.14908	14.6087	2.52706	0.0218785	0.183331	-3.66382
P53612	4.30059	11.842	2.52606	0.0219232	0.183451	-3.66569
P47738	-0.584134	22.9109	-2.52516	0.0219638	0.183537	-3.66738
Q99KU0	2.59977	13.0955	2.51746	0.0223117	0.186126	-3.68179
Q9QZ39	3.42739	11.7832	2.51695	0.0223351	0.186126	-3.68274
Q9D1G5	2.32366	15.473	2.51573	0.022391	0.186335	-3.68503
Q570Y9	0.612438	16.5758	2.51416	0.0224627	0.186429	-3.68796
P24638	0.768546	17.7102	2.51413	0.022464	0.186429	-3.68801
Q6VVW5	-2.59928	12.5932	-2.51332	0.0225012	0.186482	-3.68953
Q9EQH3	0.624826	20.5542	2.51262	0.0225334	0.186494	-3.69084
Q8VBT6	2.96282	14.943	2.51097	0.0226095	0.186868	-3.69393
P46062	0.62223	15.8937	2.5094	0.022682	0.187211	-3.69686
E9Q394	0.716086	15.1616	2.50768	0.0227614	0.187445	-3.70006
P33610	2.19489	12.3375	2.50699	0.0227939	0.187445	-3.70136
Q9JHI0	4.04728	13.2728	2.50537	0.0228693	0.187445	-3.70438
Q9D2Y4	1.43353	16.1253	2.50527	0.0228738	0.187445	-3.70457
Q8K352	2.54993	12.0085	2.50493	0.0228898	0.187445	-3.7052
P27546	0.649994	19.5767	2.50413	0.0229269	0.187445	-3.70669
Q78IS1	0.63816	16.3779	2.5039	0.0229379	0.187445	-3.70713
Q6PER3	1.86686	15.4856	2.50346	0.0229581	0.187445	-3.70793
P41241	0.797148	16.8918	2.50023	0.0231102	0.188432	-3.71397
Q921M7	0.814819	17.2184	2.49855	0.0231895	0.188671	-3.71711
Q9CYG7	0.828323	15.3376	2.49828	0.0232019	0.188671	-3.7176
Q8BZS9	0.605798	16.0646	2.49711	0.0232574	0.188869	-3.71978
Q9R045	2.70138	10.9619	2.49591	0.0233146	0.188913	-3.72203
Q8BUL6	2.58764	13.3688	2.49568	0.0233253	0.188913	-3.72245
Q8WTY4	1.56722	14.5638	2.49455	0.0233789	0.189094	-3.72455
Q8C079	2.09644	15.7796	2.49379	0.0234152	0.189135	-3.72597
Q8K010	-0.589902	18.5876	-2.49213	0.0234948	0.189525	-3.72907
Q8BUR4	0.590338	16.4463	2.48972	0.0236099	0.190065	-3.73354
Q8BFY6	0.600902	16.1949	2.48942	0.0236246	0.190065	-3.73411
Q8K1B8	1.01254	17.7908	2.48648	0.0237663	0.190321	-3.73957
Q8R2U6	0.719554	16.9272	2.48586	0.0237963	0.190321	-3.74072
Q61233	1.24465	21.5489	2.48557	0.0238103	0.190321	-3.74126
Q2TBE6	0.806947	16.5462	2.48553	0.0238124	0.190321	-3.74134
Q9ES74	0.507123	16.9716	2.4855	0.0238137	0.190321	-3.74139
P70315	1.88977	14.6487	2.48106	0.0240301	0.191797	-3.74966
Q05CL8	3.78386	11.4294	2.47852	0.0241546	0.192536	-3.75438
Q922Y1	0.83958	17.1606	2.47509	0.0243234	0.193373	-3.76074
P09036	-4.22886	14.0777	-2.47459	0.0243481	0.193373	-3.76167
Q8K0U4	0.535372	19.0461	2.47418	0.0243683	0.193373	-3.76243
Q8BRF7	0.606052	15.9291	2.4737	0.0243924	0.193373	-3.76333
Q8CF89	3.14533	11.7076	2.47315	0.0244194	0.193373	-3.76434
P97819	0.70185	15.7894	2.4715	0.0245017	0.193649	-3.76741
Q8BH48	0.760992	15.1302	2.47087	0.0245331	0.193649	-3.76858
Q62422	0.795668	18.247	2.47014	0.0245692	0.193649	-3.76993
Q99K28	0.784017	16.3268	2.46988	0.0245823	0.193649	-3.77041
Q7TQH0	0.612261	17.3644	2.4687	0.0246414	0.193851	-3.7726
Q9Z2A9	-0.719302	17.5939	-2.46809	0.0246719	0.193851	-3.77373
Q9DBF1	-0.524885	17.0513	-2.46579	0.0247875	0.194183	-3.778
Q9DBL1	-0.570742	18.8077	-2.46541	0.0248066	0.194183	-3.7787
Q99JP0	1.96684	10.856	2.46533	0.0248105	0.194183	-3.77885
Q9Z0M5	3.05727	15.8699	2.46179	0.0249894	0.195086	-3.78541
Q8R5F7	2.29868	14.6628	2.46177	0.0249903	0.195086	-3.78544
Q62148	-0.567654	20.73	-2.46059	0.0250504	0.195161	-3.78763
Q9EPB4	1.27697	14.8692	2.46031	0.0250645	0.195161	-3.78814
Q61712	1.72277	15.4825	2.45938	0.0251119	0.195279	-3.78987
Q91VM3	2.83668	11.1267	2.45863	0.0251502	0.195326	-3.79126
P97864	0.641356	15.4649	2.45576	0.025297	0.196214	-3.79657
Q6PGL7	1.80661	14.5581	2.45462	0.0253555	0.196416	-3.79867
Q91V81	2.66952	11.9484	2.45348	0.0254142	0.196618	-3.80078
Q9D7B7	2.98113	15.4924	2.45132	0.0255258	0.19723	-3.80478
Q9D8S3	1.04837	14.8054	2.45005	0.0255916	0.197486	-3.80712
Q8BY87	0.623271	15.6199	2.44848	0.0256731	0.197863	-3.81003
P70295	1.39322	14.756	2.44728	0.0257359	0.198095	-3.81225
Q99KN2	1.97223	14.4083	2.4437	0.0259231	0.198591	-3.81886
P70441	-0.963252	17.0454	-2.44319	0.0259499	0.198591	-3.8198
P49813	0.710724	18.0695	2.44258	0.0259817	0.198591	-3.82092
Q91VU0	1.91759	14.9852	2.44146	0.026041	0.198591	-3.82299
Q6A0A9	0.558929	17.0329	2.44145	0.0260415	0.198591	-3.82301
P16110	1.39136	19.481	2.44143	0.0260423	0.198591	-3.82304
Q61881	2.32355	14.0417	2.44064	0.0260839	0.198591	-3.82449
Q80YW0	1.97579	15.4846	2.44016	0.0261093	0.198591	-3.82538
Q7TN29	0.828143	16.5545	2.43999	0.0261184	0.198591	-3.82569
B1AUE5	2.37496	12.0059	2.4398	0.0261287	0.198591	-3.82605
Q9D0B5	2.30883	14.7396	2.4383	0.0262081	0.198926	-3.82882
Q8BH44	1.83939	14.5971	2.43772	0.0262385	0.198926	-3.82988
Q8CCX5	1.81699	16.3508	2.43667	0.0262947	0.199102	-3.83182
A2A9C3	2.78176	12.1457	2.4343	0.0264207	0.199807	-3.83618
Q9JKF1	0.870638	20.3014	2.43124	0.0265853	0.20046	-3.84183
Q91X78	2.9056	12.9031	2.42937	0.026686	0.20046	-3.84528
Q9CQW1	0.513258	16.5093	2.42911	0.0266997	0.20046	-3.84574
O08784	0.61547	15.9502	2.42906	0.0267026	0.20046	-3.84584
P62281	0.782894	18.881	2.42879	0.0267171	0.20046	-3.84634
Q9JMG1	2.22655	14.4451	2.42853	0.0267313	0.20046	-3.84682
P14069	1.07225	19.7314	2.42777	0.026772	0.20046	-3.8482
Q9ERI2	2.60991	13.4416	2.42777	0.0267722	0.20046	-3.84821
O89103	0.697997	17.5526	2.42377	0.0269896	0.20134	-3.85557
Q9CZE3	0.619913	17.0353	2.42371	0.0269931	0.20134	-3.85569
Q8C1Y8	1.98528	15.1894	2.42207	0.0270825	0.20134	-3.8587
Q5RJI4	-2.31735	11.3531	-2.42159	0.0271087	0.20134	-3.85958
Q8K3K8	1.10346	14.3971	2.42103	0.0271396	0.20134	-3.86062
Q9CQ79	0.697468	17.1961	2.421	0.027141	0.20134	-3.86066
Q9WTX8	2.53384	12.2793	2.4208	0.0271522	0.20134	-3.86104
P97499	0.672185	15.514	2.42073	0.027156	0.20134	-3.86117
Q921X9	2.12211	14.285	2.41991	0.027201	0.201427	-3.86267
Q9D0F6	2.4629	11.7816	2.41864	0.0272705	0.201695	-3.86499
Q9WUN2	1.55481	14.5498	2.41779	0.0273173	0.201795	-3.86656
P56565	-2.50547	11.8106	-2.41439	0.0275055	0.202937	-3.8728
Q9QZ03	2.6138	10.6911	2.4124	0.0276161	0.203254	-3.87645
Q9D0K2	0.535002	18.9931	2.41184	0.0276475	0.203254	-3.87748
Q9CPU4	-0.661028	19.46	-2.41158	0.0276619	0.203254	-3.87795
P97872	-0.558617	17.609	-2.41111	0.0276884	0.203254	-3.87883
Q8VCH0	0.752925	15.3684	2.41061	0.0277164	0.203254	-3.87975
Q8VDD8	1.97559	14.4447	2.40865	0.0278261	0.203811	-3.88334
O55229	0.622113	15.8119	2.40706	0.0279155	0.204218	-3.88625
Q02789	2.82182	8.43736	2.40592	0.0279797	0.204348	-3.88834
P35276	0.680936	19.1068	2.40555	0.0280007	0.204348	-3.88902
Q9D7X8	2.06312	14.746	2.40423	0.0280752	0.204644	-3.89144
O70579	2.61351	14.3313	2.40231	0.0281841	0.205119	-3.89495
Q149L6	2.60293	17.3999	2.40189	0.0282082	0.205119	-3.89573
Q8VEE4	1.83261	13.3231	2.40086	0.0282668	0.205299	-3.89762
Q8VDG7	1.7257	15.3215	2.3975	0.0284587	0.206205	-3.90376
Q8VE47	0.548231	16.6345	2.39689	0.0284937	0.206205	-3.90488
P97467	1.99954	15.0525	2.39648	0.0285168	0.206205	-3.90561
P62137	0.388674	18.3628	2.39629	0.0285279	0.206205	-3.90597
Q9QXS6	1.78063	16.5075	2.39422	0.0286473	0.206821	-3.90976
E9Q3E1	0.558118	19.527	2.39113	0.0288257	0.207453	-3.9154
Q62426	0.825856	20.0567	2.39094	0.0288367	0.207453	-3.91575
Q99K01	0.630732	17.4901	2.39093	0.0288376	0.207453	-3.91577
P63054	-2.62752	12.1271	-2.3903	0.0288741	0.207468	-3.91692
Q8BVU5	2.07455	14.1214	2.38906	0.0289462	0.207515	-3.91919
O55106	0.463046	17.1533	2.38901	0.0289492	0.207515	-3.91928
Q921J2	0.549222	17.5524	2.38765	0.0290286	0.207587	-3.92177
Q6PDL0	0.692351	16.6928	2.38724	0.0290523	0.207587	-3.92251
Q9D967	0.662365	17.53	2.38707	0.0290622	0.207587	-3.92282
Q99PT1	0.534407	21.1676	2.38597	0.0291269	0.207804	-3.92483
Q9R062	0.609918	18.817	2.3818	0.0293717	0.209015	-3.93243
P59999	0.855217	20.2503	2.38135	0.0293985	0.209015	-3.93326
Q9DC61	0.558224	17.7876	2.38041	0.029454	0.209015	-3.93497
P62500	3.37535	13.459	2.38035	0.0294578	0.209015	-3.93508
P54823	0.592204	16.7022	2.38015	0.0294694	0.209015	-3.93544
Q8VDJ3	0.468821	18.95	2.37939	0.0295148	0.209092	-3.93684
P58252	0.600005	22.6208	2.37863	0.0295595	0.209164	-3.93821
P62192	0.651363	18.0223	2.37785	0.0296059	0.209247	-3.93963
Q8BHK3	1.1271	15.142	2.3758	0.0297282	0.209866	-3.94337
Q9CZ69	-2.58957	13.0293	-2.37462	0.0297989	0.21012	-3.94553
Q8R373	2.15176	14.5147	2.37347	0.0298678	0.21024	-3.94762
Q99K85	0.467621	21.0062	2.37317	0.0298854	0.21024	-3.94815
Q9D0D5	2.01779	12.4215	2.37253	0.029924	0.210267	-3.94932
P52332	0.933902	15.4977	2.37067	0.0300358	0.210395	-3.95271
Q8BZJ7	2.90293	12.6694	2.37063	0.0300382	0.210395	-3.95278
Q05D44	0.746388	15.8542	2.3705	0.0300465	0.210395	-3.95303
P97351	0.71951	19.2492	2.36869	0.0301556	0.210915	-3.95631
O54774	0.551861	17.0549	2.36669	0.0302771	0.211329	-3.95996
Q59J78	2.58204	14.8756	2.36644	0.0302923	0.211329	-3.96041
Q7TSG2	1.21774	14.3031	2.36599	0.0303196	0.211329	-3.96123
Q3UMR0	1.60325	15.7196	2.36339	0.030478	0.211831	-3.96595
Q8K4B2	1.20827	12.9205	2.36257	0.0305279	0.211831	-3.96743
Q8C878	0.545867	16.1992	2.36254	0.0305297	0.211831	-3.96749
P02089	0.83511	26.2211	2.36251	0.0305316	0.211831	-3.96754
Q8BTJ4	-0.790078	15.917	-2.36077	0.0306383	0.21202	-3.9707
Q7TMQ7	1.49818	15.0399	2.35991	0.0306914	0.21202	-3.97227
Q9DCT1	0.833124	17.0457	2.35963	0.0307085	0.21202	-3.97277
P62257	0.576683	16.142	2.35941	0.030722	0.21202	-3.97317
A8Y5H7	0.813875	15.2668	2.35922	0.0307341	0.21202	-3.97353
Q8BK75	2.01379	11.3745	2.35808	0.0308045	0.212125	-3.9756
Q9ERD7	0.685449	17.2742	2.35746	0.0308427	0.212125	-3.97672
Q3U1Y4	2.79133	12.7939	2.35674	0.030887	0.212125	-3.97802
Q9DB34	1.57897	16.3825	2.35645	0.0309048	0.212125	-3.97854
P61759	1.88286	13.9098	2.35582	0.0309443	0.212125	-3.9797
O35250	1.0359	15.7505	2.35557	0.0309597	0.212125	-3.98015
Q63810	2.06799	12.5602	2.35434	0.031036	0.212407	-3.98238
Q9JK48	0.501859	18.1397	2.3521	0.0311758	0.212979	-3.98645
P59808	0.755436	15.3634	2.35146	0.0312155	0.212979	-3.9876
Q64311	1.9336	14.9198	2.35087	0.0312522	0.212979	-3.98866
Q08761	2.00538	16.4334	2.35074	0.0312604	0.212979	-3.9889
Q8VD66	0.695726	16.7642	2.34974	0.0313233	0.213107	-3.99072
Q9JJA2	1.76468	14.1952	2.34932	0.0313497	0.213107	-3.99148
Q8VCB1	0.627525	15.2464	2.34795	0.0314359	0.213454	-3.99397
Q3SXD3	2.98911	12.8551	2.3466	0.0315207	0.213789	-3.99641
Q60989	3.05519	11.4777	2.34463	0.0316452	0.214258	-3.99997
Q91Z96	2.49725	13.3198	2.34439	0.0316606	0.214258	-4.00041
Q9D8N0	0.552733	21.1676	2.34308	0.0317438	0.214319	-4.00279
Q9JM90	2.61679	11.3379	2.34258	0.0317752	0.214319	-4.00368
O08715	1.85824	13.867	2.34257	0.0317759	0.214319	-4.0037
P14142	-0.586689	17.8493	-2.33757	0.032095	0.214404	-4.01274
Q8BW41	2.78905	12.837	2.34029	0.0319208	0.214404	-4.00782
Q9D1E6	0.524193	18.8969	2.33993	0.0319444	0.214404	-4.00848
Q91WF7	0.745466	15.2956	2.33928	0.0319853	0.214404	-4.00964
Q9DC23	1.65894	15.7133	2.33871	0.0320224	0.214404	-4.01069
Q91XU3	0.867317	15.3294	2.3386	0.032029	0.214404	-4.01088
Q6PAJ1	1.91324	14.5865	2.338	0.0320678	0.214404	-4.01197
O35344	0.52651	17.1719	2.3378	0.0320801	0.214404	-4.01232
Q9D8C2	3.14983	12.2065	2.33735	0.0321091	0.214404	-4.01314
Q8K1I3	2.73608	12.511	2.33683	0.0321428	0.214404	-4.01408
Q9DBQ7	0.858182	15.0613	2.33577	0.0322111	0.214622	-4.016
Q64511	0.595352	16.3241	2.33498	0.0322616	0.21464	-4.01742
Q9ERI6	0.593523	16.96	2.33462	0.0322847	0.21464	-4.01806
Q80XS6	2.33265	11.1955	2.33344	0.0323613	0.214913	-4.02021
Q61084	2.25376	13.8095	2.33208	0.0324495	0.215263	-4.02267
Q9Z0F7	0.579508	21.0562	2.33076	0.0325349	0.21539	-4.02504
Q8BMJ2	0.562424	17.9881	2.33068	0.0325399	0.21539	-4.02518
Q61462	1.31618	15.0833	2.32961	0.0326099	0.215446	-4.02712
Q6GV12	-0.666693	16.9283	-2.32946	0.0326196	0.215446	-4.02739
Q9Z0M9	1.8475	10.4305	2.32784	0.0327253	0.215908	-4.03031
Q9Z2Z6	0.551279	18.7254	2.32518	0.0328995	0.216136	-4.03511
P61222	0.735904	18.1528	2.32603	0.0328436	0.216136	-4.03357
Q3URD3	-3.04523	13.7027	-2.32518	0.0328996	0.216136	-4.03511
Q8BJ03	3.7523	13.7154	2.32513	0.0329026	0.216136	-4.03519
Q6P8M1	-2.0677	13.8546	-2.32439	0.0329515	0.216175	-4.03654
Q6PD28	1.81615	14.656	2.32347	0.0330119	0.216175	-4.03819
Q8C0I1	0.773285	15.4354	2.32341	0.0330159	0.216175	-4.0383
Q9CQV4	0.540578	16.7855	2.3225	0.0330757	0.216333	-4.03993
P70663	0.878355	15.0261	2.31887	0.0333158	0.217668	-4.04646
Q6P9J9	-0.74087	15.8798	-2.31729	0.0334211	0.217866	-4.04931
Q91X96	1.53048	15.5819	2.31718	0.0334284	0.217866	-4.04951
O70551	2.30113	10.3378	2.3168	0.0334541	0.217866	-4.0502
Q9WUZ9	1.40181	14.7951	2.31553	0.0335387	0.218182	-4.05248
Q6P4S6	1.90052	9.51229	2.31496	0.0335766	0.218194	-4.0535
P97427	-0.761624	9.78608	-2.31226	0.0337579	0.219137	-4.05836
Q8C5Q4	2.49413	9.87215	2.3096	0.0339374	0.220066	-4.06315
Q99MR8	-0.543556	19.5277	-2.30541	0.0342218	0.220969	-4.07067
Q8CFI2	0.700666	15.8136	2.30539	0.034223	0.220969	-4.07071
Q8CFD4	1.46268	14.8971	2.3049	0.034256	0.220969	-4.07158
Q3UQ28	0.986594	17.5183	2.30426	0.0343002	0.220969	-4.07274
O54950	2.0096	14.4753	2.30423	0.0343023	0.220969	-4.07279
P70180	0.583256	17.7752	2.30412	0.0343096	0.220969	-4.07299
Q91V76	0.612306	20.0517	2.30379	0.0343323	0.220969	-4.07358
P18242	0.914697	21.8774	2.30172	0.0344737	0.221008	-4.07729
O70400	0.497629	19.1731	2.30148	0.0344902	0.221008	-4.07772
Q9JL35	1.53463	15.0158	2.30111	0.0345159	0.221008	-4.07839
Q9DBV4	3.63205	13.516	2.3011	0.0345165	0.221008	-4.0784
P60867	0.587956	19.6658	2.30092	0.0345285	0.221008	-4.07872
Q63844	0.642633	19.2831	2.30021	0.0345772	0.221008	-4.07999
Q60778	1.81725	15.872	2.29997	0.0345942	0.221008	-4.08043
O89104	-1.86758	9.91294	-2.29944	0.0346306	0.221008	-4.08138
Q9EP53	2.78193	10.9446	2.29752	0.0347629	0.22123	-4.08482
Q8BQZ5	2.21892	10.7418	2.29743	0.0347692	0.22123	-4.08498
Q99104	1.92338	14.3231	2.29734	0.0347751	0.22123	-4.08513
Q62219	0.544468	16.8713	2.2968	0.0348124	0.221235	-4.0861
Q3UMT1	0.900742	15.3024	2.29515	0.0349271	0.22135	-4.08906
Q6NZC7	0.440287	16.8017	2.29504	0.0349344	0.22135	-4.08925
Q08943	0.508755	16.1535	2.29496	0.0349404	0.22135	-4.08941
Q9QYI3	0.638579	15.9385	2.29173	0.0351653	0.222234	-4.09518
P26638	0.561819	19.1328	2.2914	0.0351883	0.222234	-4.09578
O54834	4.73598	11.0865	2.29125	0.0351991	0.222234	-4.09605
Q9JL26	2.30744	14.3935	2.29085	0.0352269	0.222234	-4.09676
P10518	-0.589498	18.7505	-2.2885	0.0353918	0.222888	-4.10097
Q8R3U1	0.861477	16.4281	2.28832	0.0354042	0.222888	-4.10128
Q91VW3	1.50724	17.9899	2.28721	0.0354822	0.223147	-4.10327
Q9Z0W3	0.822685	14.9633	2.28558	0.0355973	0.223638	-4.10618
Q60960	2.07278	13.4004	2.28482	0.0356509	0.223743	-4.10754
Q9DBG5	0.616846	17.6187	2.28358	0.0357391	0.224056	-4.10976
O55131	0.475107	17.6936	2.28307	0.0357748	0.224056	-4.11066
O08600	0.589537	15.9307	2.28223	0.0358349	0.2242	-4.11217
Q69ZJ7	0.87275	13.426	2.28057	0.0359528	0.224526	-4.11513
P23780	0.578202	18.8794	2.28045	0.0359612	0.224526	-4.11534
Q9JK23	0.560144	16.2523	2.27739	0.0361802	0.225596	-4.1208
Q9CQ10	1.85027	15.5787	2.27702	0.0362072	0.225596	-4.12147
Q5SUE8	1.99033	14.6578	2.2747	0.036374	0.226402	-4.12561
Q9JI90	0.529503	15.7245	2.27391	0.0364308	0.226522	-4.12701
P14426	1.89179	10.8858	2.27118	0.0366283	0.227335	-4.13187
Q5SSW2	0.529322	13.7995	2.27107	0.0366366	0.227335	-4.13207
P42208	0.542018	19.1307	2.27024	0.036697	0.227476	-4.13356
Q9Z1T1	0.5312	18.4572	2.26972	0.0367349	0.227478	-4.13448
Q91ZF0	1.69774	16.843	2.26873	0.0368064	0.227479	-4.13623
Q920L1	-1.68991	15.5071	-2.26845	0.0368271	0.227479	-4.13674
Q99P88	0.597761	15.779	2.26816	0.0368479	0.227479	-4.13725
Q99J62	2.31628	13.3575	2.26703	0.0369306	0.227758	-4.13926
Q9D7M8	2.11937	11.5709	2.26593	0.0370111	0.227802	-4.14122
Q9CQ40	2.70511	12.1257	2.2659	0.0370131	0.227802	-4.14127
Q64362	1.90234	11.3158	2.26501	0.0370788	0.227974	-4.14286
B1AVZ0	3.43882	13.0796	2.26411	0.037145	0.22807	-4.14446
P42209	2.58705	12.1851	2.26377	0.0371697	0.22807	-4.14506
O35685	0.770034	16.3689	2.26271	0.0372476	0.22822	-4.14694
Q99LH9	2.57228	13.553	2.26241	0.0372697	0.22822	-4.14747
Q9JM96	0.581728	14.817	2.26165	0.0373263	0.228243	-4.14884
Q8BX10	0.995952	15.6564	2.26121	0.0373582	0.228243	-4.14961
Q8K5B2	2.4736	11.7064	2.26083	0.0373867	0.228243	-4.15029
Q9CY62	2.19576	14.6723	2.25896	0.0375254	0.228566	-4.15362
O54754	0.468576	16.7385	2.25837	0.037569	0.228566	-4.15466
Q9ET66	2.79871	12.3242	2.25789	0.0376049	0.228566	-4.15552
Q9R0C8	2.07381	13.6109	2.25758	0.0376274	0.228566	-4.15606
Q80VQ0	0.615749	19.5576	2.25725	0.0376523	0.228566	-4.15665
Q99LC9	1.57877	14.3803	2.25706	0.0376661	0.228566	-4.15698
P31996	1.12236	19.2313	2.25386	0.0379051	0.229615	-4.16266
Q9JHH9	0.688192	15.7402	2.25346	0.0379356	0.229615	-4.16338
P21614	0.89163	19.0563	2.25311	0.0379616	0.229615	-4.164
O88947	1.50238	16.589	2.25272	0.0379909	0.229615	-4.16469
Q9CZ30	0.562191	19.5741	2.25216	0.0380327	0.229639	-4.16568
Q99KR8	2.77932	12.8446	2.25087	0.0381297	0.229995	-4.16796
P19973	0.84138	16.7242	2.24935	0.0382449	0.23046	-4.17067
Q3UPL0	0.469324	19.3911	2.24691	0.0384294	0.231169	-4.17499
P97825	1.92359	15.7924	2.24674	0.0384419	0.231169	-4.17528
P20934	2.47	10.7033	2.24556	0.038532	0.231169	-4.17738
Q8K0D2	2.24187	17.1387	2.24552	0.0385349	0.231169	-4.17745
Q3TPX4	0.548085	16.2924	2.24527	0.0385537	0.231169	-4.17789
P97742	0.746119	17.3913	2.24441	0.0386194	0.231334	-4.17941
Q8BSD5	3.11401	9.76542	2.24319	0.0387125	0.231449	-4.18157
P54254	1.96322	10.3272	2.243	0.0387274	0.231449	-4.18192
Q9CRC8	0.838408	15.3903	2.24266	0.0387533	0.231449	-4.18252
Q9Z127	2.15361	16.0935	2.24173	0.0388244	0.231644	-4.18416
Q920E5	0.655504	16.288	2.23977	0.0389748	0.231939	-4.18763
Q9EQG9	0.428664	16.8561	2.23919	0.0390193	0.231939	-4.18865
B2RY04	1.63897	13.5426	2.23894	0.0390382	0.231939	-4.18909
Q9DCC8	3.08367	16.2419	2.23843	0.0390776	0.231939	-4.18999
Q8VC31	2.66831	13.6576	2.23811	0.0391021	0.231939	-4.19056
Q3U0V2	1.26535	14.6222	2.23809	0.0391038	0.231939	-4.19059
Q80UY2	2.51992	14.9063	2.23659	0.0392195	0.232398	-4.19324
Q8R050	0.457746	18.1231	2.23534	0.0393168	0.232746	-4.19546
Q6Y7W8	1.39781	13.7234	2.23386	0.039431	0.2329	-4.19806
Q99KY4	0.579808	16.8376	2.23378	0.0394379	0.2329	-4.19822
O09005	1.35502	14.984	2.23312	0.0394887	0.2329	-4.19937
P35279	0.600122	18.5852	2.23284	0.0395105	0.2329	-4.19987
Q8BPE4	1.60713	10.7959	2.23224	0.0395575	0.2329	-4.20093
Q8N9S3	2.97108	14.2181	2.23203	0.0395737	0.2329	-4.2013
Q9R0N0	-0.627105	18.1152	-2.22864	0.039839	0.234233	-4.20729
Q6ZWN5	0.58301	20.8147	2.22732	0.0399421	0.234611	-4.2096
Q3UE37	1.84259	16.7489	2.22635	0.0400187	0.234833	-4.21132
P57780	0.531677	19.9293	2.22398	0.0402058	0.235703	-4.2155
C8YR32	0.616146	22.4276	2.22315	0.0402716	0.235772	-4.21696
Q922H4	0.646761	16.9135	2.22285	0.0402955	0.235772	-4.21749
Q9D7B6	-0.447999	17.6848	-2.2214	0.0404106	0.236216	-4.22005
Q08509	-1.37587	15.4974	-2.22043	0.0404877	0.236439	-4.22175
Q08857	-0.581198	23.6002	-2.21207	0.0411584	0.238672	-4.23646
Q9D8T7	2.64182	13.8681	2.21506	0.0409174	0.238672	-4.2312
Q80UM3	0.697474	16.7519	2.21425	0.0409824	0.238672	-4.23262
Q9CWX9	2.43473	11.0027	2.2133	0.0410589	0.238672	-4.23429
P51660	0.491073	21.7481	2.21285	0.041095	0.238672	-4.23508
Q8VE80	1.4526	15.1694	2.21241	0.0411305	0.238672	-4.23585
Q91VJ2	0.810766	20.3912	2.21194	0.0411689	0.238672	-4.23668
Q8K0H5	1.53457	13.4	2.21148	0.0412063	0.238672	-4.23749
Q9CZJ2	0.463521	19.5062	2.21062	0.0412756	0.238672	-4.239
Q3TV70	2.01509	10.988	2.21022	0.041308	0.238672	-4.2397
Q9DBZ1	1.05182	15.241	2.21008	0.0413197	0.238672	-4.23995
Q8K2C9	-0.694097	16.3896	-2.20893	0.0414128	0.238672	-4.24197
Q8BZN6	2.25889	14.6243	2.20821	0.0414714	0.238672	-4.24323
Q61210	0.778759	16.0841	2.20713	0.0415591	0.238672	-4.24512
P40336	0.51142	19.3514	2.20664	0.0415997	0.238672	-4.24599
P52875	2.66667	13.5047	2.20633	0.0416247	0.238672	-4.24653
Q9R269	-0.991402	15.1895	-2.20612	0.0416419	0.238672	-4.2469
Q9D1C8	2.09441	14.6871	2.20531	0.0417078	0.238672	-4.24831
Q62433	-0.669882	16.7346	-2.20526	0.041712	0.238672	-4.2484
Q9JHQ0	-2.08595	12.9657	-2.20485	0.041746	0.238672	-4.24913
Q9DD18	-0.801403	15.0354	-2.20485	0.0417461	0.238672	-4.24913
Q80W21	-2.56033	11.9658	-2.20465	0.0417624	0.238672	-4.24948
Q5M8N4	-0.64449	16.8318	-2.2041	0.0418076	0.238672	-4.25045
Q9Z2R6	0.669009	17.0058	2.20398	0.041817	0.238672	-4.25065
Q03958	2.86712	13.6392	2.20232	0.0419531	0.239224	-4.25356
Q01065	2.32938	14.07	2.20157	0.0420151	0.239259	-4.25487
Q64516	2.3678	15.1881	2.20129	0.0420384	0.239259	-4.25537
Q8C3W1	2.561	13.119	2.19987	0.0421553	0.239699	-4.25785
Q62192	1.58507	15.1914	2.19718	0.0423781	0.240739	-4.26256
O70172	1.0383	14.0888	2.19625	0.0424553	0.240952	-4.26419
P19426	-2.14248	11.8301	-2.19568	0.0425032	0.240969	-4.26519
O70481	1.24716	15.0575	2.19449	0.0426023	0.240969	-4.26727
Q6ZWV3	0.687789	18.119	2.19435	0.0426138	0.240969	-4.26751
Q99M04	2.57272	13.6837	2.19376	0.0426631	0.240969	-4.26855
P56375	0.647411	19.0751	2.19309	0.0427189	0.240969	-4.26971
P39749	1.87764	15.7957	2.19296	0.0427302	0.240969	-4.26995
Q8CGB3	1.66502	13.3354	2.19278	0.0427454	0.240969	-4.27027
Q0VGY8	1.85269	12.2098	2.19217	0.0427961	0.240969	-4.27133
P59729	-3.69761	15.5515	-2.19188	0.0428209	0.240969	-4.27184
Q8K221	1.7414	15.0885	2.19145	0.0428567	0.240969	-4.27259
Q62167	0.481356	18.8515	2.19044	0.0429414	0.241081	-4.27435
Q68FL6	0.600109	16.9584	2.18976	0.042999	0.241081	-4.27555
Q91YN5	0.544507	17.2515	2.1891	0.0430544	0.241081	-4.2767
Q99KI3	0.533421	17.1978	2.1885	0.0431051	0.241081	-4.27775
Q99PU8	2.76239	13.2659	2.1885	0.0431053	0.241081	-4.27775
Q8R2V5	0.762249	16.0428	2.18837	0.0431156	0.241081	-4.27797
Q80U56	2.13138	13.3111	2.18684	0.0432448	0.241124	-4.28064
Q8CHQ0	0.49673	15.8876	2.18667	0.0432598	0.241124	-4.28095
Q3UFS0	2.56487	10.7268	2.18654	0.0432702	0.241124	-4.28116
Q9WVA4	0.756112	20.1196	2.1864	0.0432827	0.241124	-4.28142
Q8BH70	2.67718	14.1905	2.18449	0.0434442	0.241801	-4.28474
P28271	-0.505332	19.5054	-2.1797	0.0438527	0.243123	-4.29309
P11680	1.46969	15.9481	2.18053	0.0437823	0.243123	-4.29166
Q9D868	1.36466	15.3051	2.18044	0.0437897	0.243123	-4.29181
Q9D0L7	-2.52567	14.8152	-2.18011	0.0438176	0.243123	-4.29238
Q62101	1.8349	14.084	2.17935	0.0438827	0.243123	-4.2937
Q8CEK3	-3.87175	10.3814	-2.17752	0.0440403	0.243773	-4.2969
Q9R160	3.32817	13.2682	2.17588	0.0441819	0.244333	-4.29976
Q9JI75	0.475653	17.4346	2.1736	0.044379	0.245199	-4.30373
Q5DU37	3.11734	13.5132	2.17273	0.0444544	0.245391	-4.30524
Q810J8	2.72383	14.0052	2.17141	0.0445688	0.245743	-4.30753
Q60596	1.91414	14.0038	2.17082	0.0446203	0.245743	-4.30856
O70251	0.5431	19.4677	2.17045	0.0446529	0.245743	-4.30921
Q8BQ47	0.731771	15.2369	2.17013	0.0446806	0.245743	-4.30976
Q8C5W3	0.694711	15.5479	2.16949	0.044736	0.245825	-4.31087
Q8K2H2	0.537861	14.7909	2.16887	0.0447907	0.245902	-4.31196
O54984	0.499013	19.8409	2.16775	0.0448882	0.246214	-4.31389
Q64737	0.58543	17.4399	2.16633	0.045013	0.246675	-4.31637
Q9D787	1.98345	11.0864	2.16572	0.0450663	0.246707	-4.31742
Q8VDW0	1.01942	15.5935	2.16533	0.0451004	0.246707	-4.31809
Q2EMV9	1.18466	14.7362	2.16208	0.0453873	0.247765	-4.32374
Q01721	-0.976333	13.9206	-2.16167	0.0454235	0.247765	-4.32445
P51855	0.540676	18.2865	2.16147	0.0454413	0.247765	-4.3248
Q9JJN5	0.61529	16.5007	2.16129	0.0454577	0.247765	-4.32512
Q3V384	-0.693935	14.6026	-2.1597	0.045598	0.248286	-4.32786
Q8VC19	2.68428	12.6458	2.15928	0.0456354	0.248286	-4.32859
Q8BTW3	1.96801	14.7788	2.15838	0.0457158	0.248294	-4.33016
Q8K4I3	0.634556	17.3729	2.15835	0.0457188	0.248294	-4.33022
P58069	1.1773	15.0198	2.15732	0.0458104	0.248493	-4.332
Q61555	-1.4174	8.82098	-2.157	0.0458384	0.248493	-4.33254
P62869	0.523428	19.4066	2.15655	0.0458788	0.248493	-4.33333
Q9WU79	-0.803545	16.293	-2.15594	0.0459338	0.248497	-4.33439
Q9CRD2	0.812417	16.8841	2.15524	0.045996	0.248497	-4.3356
Q9QZ73	0.657342	15.5402	2.15517	0.0460027	0.248497	-4.33573
Q3TGW2	-0.576609	16.7193	-2.15364	0.0461401	0.248518	-4.33838
P62301	0.659551	19.7494	2.15307	0.0461911	0.248518	-4.33936
Q9D753	1.76461	14.6406	2.15301	0.0461961	0.248518	-4.33946
P42567	0.464521	17.8268	2.15265	0.0462285	0.248518	-4.34008
Q9CQY1	2.32866	13.3414	2.15246	0.0462462	0.248518	-4.34042
Q8BTS4	0.738795	15.7006	2.15238	0.0462531	0.248518	-4.34056
P10810	-0.919767	15.2255	-2.15172	0.0463124	0.248611	-4.3417
Q3TGF2	2.58086	11.2238	2.15034	0.0464372	0.248611	-4.34409
P70268	0.600186	17.1583	2.15004	0.046464	0.248611	-4.3446
P60843	0.525556	21.6246	2.14957	0.0465061	0.248611	-4.34541
Q7TMR0	0.628357	16.9833	2.14898	0.0465602	0.248611	-4.34644
Q9QZR0	2.17339	11.9913	2.14891	0.0465663	0.248611	-4.34656
P51863	0.70306	18.1588	2.14848	0.0466053	0.248611	-4.3473
Q9CWS4	1.63927	14.9093	2.14835	0.0466168	0.248611	-4.34752
P55937	0.578866	14.9341	2.14809	0.0466402	0.248611	-4.34797
P70236	2.61431	14.1658	2.14742	0.0467015	0.248719	-4.34914
O88271	2.27554	12.5051	2.14646	0.0467884	0.248861	-4.35079
Q9QUN3	2.63854	13.5702	2.14609	0.0468221	0.248861	-4.35143
P97865	1.83063	9.48106	2.14535	0.0468899	0.248861	-4.35272
Q8CB96	2.48507	12.0567	2.14506	0.046916	0.248861	-4.35321
O88667	2.43029	13.3497	2.14456	0.0469616	0.248861	-4.35407
P69566	0.485321	14.9117	2.14441	0.0469751	0.248861	-4.35433
Q9D051	-0.519816	20.6626	-2.1423	0.0471686	0.249627	-4.35798
Q8CIV2	1.9398	12.8923	2.14193	0.0472023	0.249627	-4.35862
Q8R395	2.1167	14.1085	2.14132	0.0472587	0.249707	-4.35968
Q99J77	0.628372	16.8322	2.13937	0.0474378	0.250435	-4.36304
Q793I8	2.11858	11.5591	2.13704	0.0476525	0.251218	-4.36705
Q9D6S7	2.01677	14.1512	2.13686	0.0476691	0.251218	-4.36736
Q9DB73	0.603925	16.557	2.13554	0.0477912	0.25122	-4.36963
Q8R0F8	3.30528	10.7387	2.13488	0.0478534	0.25122	-4.37078
E9PVA8	0.540747	17.203	2.13459	0.0478803	0.25122	-4.37128
P83882	1.0678	18.5135	2.13439	0.0478987	0.25122	-4.37163
Q9DBN5	0.523709	16.3013	2.13404	0.0479311	0.25122	-4.37223
P42225	0.592581	18.2525	2.13352	0.0479798	0.25122	-4.37313
O70572	0.436598	17.0502	2.13292	0.0480357	0.25122	-4.37416
Q99LR1	0.687044	18.7894	2.13288	0.0480391	0.25122	-4.37422
Q9CXD9	2.33604	14.2296	2.13283	0.0480433	0.25122	-4.3743
Q9Z1R2	0.456628	18.3824	2.13214	0.0481084	0.251343	-4.3755
Q6PD26	0.563082	17.0477	2.13117	0.0481986	0.251362	-4.37717
O88342	0.678926	21.0952	2.1308	0.0482328	0.251362	-4.3778
Q61655	0.742849	16.3524	2.13076	0.0482365	0.251362	-4.37786
Q6A028	1.00999	15.9473	2.13018	0.0482914	0.251415	-4.37887
D3Z7P3	0.616274	16.7929	2.12977	0.0483298	0.251415	-4.37958
P61290	0.689922	16.0321	2.12461	0.0488155	0.253723	-4.38845
Q8BM85	2.04887	15.1702	2.12322	0.048947	0.254188	-4.39084
Q9WVB0	0.596212	17.0086	2.1222	0.0490437	0.254282	-4.39259
Q8BL99	1.93452	9.58446	2.12197	0.0490655	0.254282	-4.39298
Q80UJ7	0.450644	16.5914	2.12161	0.0491	0.254282	-4.39361
Q8CIX8	-0.59552	14.707	-2.12126	0.0491331	0.254282	-4.3942
Q9WU78	0.545424	18.5111	2.12081	0.0491764	0.254288	-4.39498
Q9EQJ9	2.07433	12.5291	2.12035	0.0492196	0.254294	-4.39576
Q9DBL2	0.495747	14.9347	2.11981	0.0492713	0.254344	-4.39669
Q3TB82	1.92241	16.3662	2.11806	0.0494388	0.254991	-4.3997
P70188	-0.735164	14.6404	-2.11709	0.0495315	0.255009	-4.40136
Q9ERK4	0.555692	18.4259	2.11652	0.0495859	0.255009	-4.40234
P97346	1.38116	14.8574	2.11574	0.0496609	0.255009	-4.40368
Q8BYK6	1.62594	15.5156	2.11567	0.0496671	0.255009	-4.40379
Q921I9	1.359	14.5628	2.11546	0.049688	0.255009	-4.40416
Q3ULD5	-0.481183	18.9375	-2.11519	0.0497139	0.255009	-4.40462
Q9WV98	3.05792	13.3772	2.11494	0.0497372	0.255009	-4.40504
P99026	0.553204	18.6719	2.11191	0.0500302	0.256041	-4.41024
P34152	0.543166	16.6139	2.11189	0.0500322	0.256041	-4.41028
Q64092	3.21005	13.1293	2.11154	0.0500655	0.256041	-4.41086
Q8R1B4	0.488035	19.1211	2.11055	0.0501618	0.256317	-4.41257
E9Q735	0.551219	16.112	2.10911	0.0503013	0.256691	-4.41503
Q05421	-1.10039	20.2363	-2.10892	0.05032	0.256691	-4.41536
Q8C1B7	0.659823	18.2925	2.10736	0.050472	0.257235	-4.41803
Q14CH1	-1.2956	16.0529	-2.1061	0.0505948	0.257235	-4.42018
Q6PEE2	1.38132	14.6961	2.10562	0.050642	0.257235	-4.42101
Q8BGC4	-0.510684	17.1754	-2.10552	0.0506512	0.257235	-4.42117
Q8BGH2	-0.534488	17.9282	-2.1052	0.0506824	0.257235	-4.42171
Q8C052	0.596582	17.7914	2.10476	0.0507264	0.257235	-4.42248
A6H8H2	1.26945	15.3128	2.104	0.0508007	0.257235	-4.42377
A2A8L5	-0.79857	14.7987	-2.10299	0.0508995	0.257235	-4.42549
Q8BK63	0.543284	15.9229	2.10277	0.0509213	0.257235	-4.42587
O70228	0.562654	16.9653	2.10261	0.0509368	0.257235	-4.42614
P62852	0.95513	19.5103	2.10201	0.0509959	0.257235	-4.42717
B2RSH2	-0.556396	18.8685	-2.10178	0.0510191	0.257235	-4.42757
Q9DAM7	1.32974	15.1354	2.10172	0.0510243	0.257235	-4.42766
P12023	0.785465	15.5477	2.10141	0.0510547	0.257235	-4.42819
Q68FD5	0.49765	21.843	2.1004	0.0511541	0.257235	-4.42991
Q99K23	0.431236	16.6172	2.10012	0.0511825	0.257235	-4.4304
Q9QXT5	1.41173	10.5421	2.09959	0.0512347	0.257235	-4.4313
A2ARV4	-2.68966	12.3553	-2.09955	0.0512382	0.257235	-4.43136
Q9WVL1	1.18741	13.1076	2.09924	0.0512692	0.257235	-4.4319
P35831	0.524152	15.6091	2.0991	0.0512831	0.257235	-4.43214
P63328	0.513393	17.8819	2.09856	0.0513367	0.257235	-4.43306
P63087	0.514082	18.7431	2.0983	0.051362	0.257235	-4.4335
Q9CQA9	1.62108	14.609	2.09414	0.0517763	0.258977	-4.4406
Q9Z2C5	1.21989	14.3576	2.09394	0.0517956	0.258977	-4.44093
P57746	0.817179	15.9133	2.09352	0.0518383	0.258977	-4.44166
P12970	0.662917	17.8828	2.09288	0.0519019	0.259081	-4.44275
Q8K1X4	2.255	13.171	2.09013	0.0521775	0.260242	-4.44743
Q8CB77	1.66282	13.0923	2.08753	0.0524399	0.260941	-4.45186
Q8R2R3	0.65034	13.9703	2.08751	0.052441	0.260941	-4.45188
Q9D1P0	2.45881	13.2071	2.08721	0.052472	0.260941	-4.4524
Q9CZB0	-0.718909	17.1745	-2.08661	0.0525325	0.260941	-4.45342
Q8BP78	2.37771	14.7512	2.0866	0.0525333	0.260941	-4.45343
Q8VC57	2.16992	11.9582	2.0847	0.0527261	0.261616	-4.45667
Q71FD7	1.3571	14.4034	2.08358	0.0528393	0.261616	-4.45857
P56477	2.20184	11.5265	2.0835	0.0528474	0.261616	-4.4587
O55239	0.486264	19.6915	2.08326	0.0528727	0.261616	-4.45912
Q9QY76	0.439253	18.5057	2.08296	0.0529031	0.261616	-4.45963
P18572	-0.594034	20.0826	-2.08271	0.0529286	0.261616	-4.46006
Q8VDL4	0.514644	18.4315	2.08144	0.0530578	0.261913	-4.46221
Q99JY9	0.876185	19.8533	2.08127	0.0530753	0.261913	-4.4625
Q80XQ2	0.67282	15.734	2.07951	0.0532553	0.2625	-4.46549
Q9D1G2	0.554505	16.5326	2.07925	0.053281	0.2625	-4.46592
P10922	-0.565462	18.4627	-2.07784	0.0534266	0.262753	-4.46833
Q8K1E0	0.761597	15.4548	2.07732	0.0534795	0.262753	-4.4692
P34928	1.55205	17.1999	2.07704	0.0535082	0.262753	-4.46967
Q9D0B0	2.78064	12.7942	2.0762	0.0535947	0.262753	-4.4711
P31786	0.787951	19.4328	2.07609	0.0536059	0.262753	-4.47128
Q8BJH1	1.43132	15.1064	2.07586	0.0536297	0.262753	-4.47168
P32067	0.722366	16.1185	2.0758	0.0536363	0.262753	-4.47178
P09671	0.587028	20.7448	2.07083	0.0541506	0.265058	-4.4802
Q9CQM9	0.459305	19.0142	2.07038	0.0541974	0.26506	-4.48097
Q8R016	0.535277	19.2134	2.0696	0.0542781	0.26506	-4.48228
O70325	0.492475	20.8744	2.06946	0.0542926	0.26506	-4.48251
Q8R5G7	1.20877	14.8117	2.06914	0.0543264	0.26506	-4.48306
P41216	0.568216	21.4807	2.06799	0.0544463	0.265431	-4.48501
Q80Z24	-1.71899	14.2181	-2.06635	0.0546176	0.266052	-4.48778
P84099	0.929065	18.2859	2.06503	0.054757	0.266071	-4.49002
O35350	0.478872	18.6017	2.06468	0.0547933	0.266071	-4.49061
P08905	0.87154	17.1804	2.06397	0.0548675	0.266071	-4.4918
Q925N2	-3.08591	12.5548	-2.06333	0.0549358	0.266071	-4.4929
Q9CY64	0.506865	19.8489	2.06331	0.0549376	0.266071	-4.49293
P52430	0.538464	18.1849	2.0631	0.054959	0.266071	-4.49327
P29341	0.574943	20.3489	2.06286	0.0549843	0.266071	-4.49368
Q3U308	1.59716	13.7077	2.06271	0.055001	0.266071	-4.49394
Q8K1H1	0.57953	15.6276	2.0625	0.0550231	0.266071	-4.4943
Q9Z2I0	0.628846	16.4042	2.06214	0.0550612	0.266071	-4.49491
Q8BVU0	2.26826	12.2901	2.06063	0.0552209	0.266629	-4.49746
O54901	-0.916067	15.945	-2.05943	0.0553474	0.267027	-4.49948
Q60631	0.488565	17.4284	2.05862	0.055433	0.267107	-4.50084
P31230	0.627962	16.5986	2.05844	0.0554524	0.267107	-4.50114
Q921V5	1.47691	15.7383	2.05746	0.0555565	0.267396	-4.5028
Q9D0R8	2.20504	10.3471	2.05695	0.0556116	0.267448	-4.50367
P48024	2.03959	15.3874	2.05553	0.0557624	0.267889	-4.50605
O88413	2.32444	11.5832	2.05526	0.0557917	0.267889	-4.50652
Q8BFY9	0.416537	16.6481	2.05437	0.0558862	0.26813	-4.50801
O88736	0.545995	16.1058	2.05366	0.0559627	0.268141	-4.50921
Q8VI75	0.59851	16.5069	2.05323	0.056009	0.268141	-4.50994
Q5SV85	-1.91985	16.1495	-2.05311	0.0560214	0.268141	-4.51014
P61620	0.602641	18.2952	2.05081	0.0562687	0.269107	-4.51401
Q60992	1.33561	13.5109	2.0504	0.0563123	0.269107	-4.51469
Q9D9V3	0.530272	20.9485	2.04965	0.0563939	0.269284	-4.51597
Q80T85	1.79938	12.2404	2.04919	0.0564435	0.269309	-4.51674
Q9JIK5	0.44649	16.294	2.04793	0.0565791	0.269548	-4.51885
P47754	0.576823	21.005	2.0479	0.0565828	0.269548	-4.51891
A6H6E2	0.975757	14.8764	2.04686	0.0566952	0.269772	-4.52066
P62242	0.630222	19.3058	2.04663	0.0567197	0.269772	-4.52104
Q8C0D4	1.73553	12.0458	2.04617	0.05677	0.269772	-4.52182
Q9D820	2.79057	14.9151	2.04582	0.0568082	0.269772	-4.52241
Q8BLK9	3.02625	12.363	2.04532	0.0568621	0.269816	-4.52324
Q9EPL9	0.562586	17.6894	2.04491	0.0569066	0.269816	-4.52393
Q91YN0	2.42556	13.2553	2.04437	0.0569654	0.269883	-4.52484
Q8BTM8	0.626123	21.6234	2.04194	0.0572313	0.270931	-4.52894
Q9WVJ3	-1.22712	18.1001	-2.03996	0.0574471	0.271627	-4.53224
Q9CZW4	3.5288	14.69	2.03927	0.0575229	0.271627	-4.5334
Q9CQV8	0.636679	21.3982	2.03923	0.0575278	0.271627	-4.53348
Q8R238	1.35428	15.5732	2.03895	0.0575581	0.271627	-4.53394
P57776	0.745378	20.3741	2.03608	0.0578745	0.272908	-4.53876
Q9CQS8	0.485687	19.5687	2.03295	0.0582214	0.274301	-4.54401
B2RUR8	1.97625	9.37688	2.0326	0.0582606	0.274301	-4.5446
P0C8B4	1.50716	14.6569	2.03095	0.0584438	0.274949	-4.54736
P97772	1.4263	11.9513	2.03003	0.0585463	0.275217	-4.5489
P14131	0.528861	19.4831	2.02907	0.0586534	0.275507	-4.5505
Q99PU5	-2.77853	11.9762	-2.02832	0.0587369	0.275685	-4.55175
Q91WG8	0.541304	15.6508	2.02767	0.0588097	0.275813	-4.55284
P21126	0.648317	16.3067	2.0261	0.0589859	0.276079	-4.55547
Q9Z0M6	0.685135	16.0635	2.0259	0.0590093	0.276079	-4.55581
P70269	2.23751	13.038	2.02572	0.0590287	0.276079	-4.5561
Q9DB76	2.46148	13.1682	2.0252	0.059087	0.276079	-4.55697
P63166	0.629095	17.4412	2.02514	0.0590947	0.276079	-4.55708
Q3TVP5	2.48103	15.0013	2.02432	0.0591869	0.276297	-4.55845
O08573	0.740407	16.0764	2.02264	0.0593763	0.27678	-4.56126
Q8VCM3	1.51033	14.2773	2.02259	0.0593819	0.27678	-4.56134
Q9D0L8	1.20125	14.7781	2.02156	0.0594979	0.277107	-4.56305
Q8K4M5	2.10115	12.6542	2.02058	0.0596095	0.277413	-4.56469
Q60974	3.61148	13.1159	2.01826	0.0598736	0.278084	-4.56857
Q99LD4	0.53243	17.9561	2.018	0.059903	0.278084	-4.569
Q8CAS9	0.576798	16.5896	2.01768	0.0599396	0.278084	-4.56954
P35802	-0.863292	16.1289	-2.01759	0.0599493	0.278084	-4.56968
Q80YR5	2.42924	13.607	2.01729	0.0599834	0.278084	-4.57018
P47856	0.531943	15.4865	2.01656	0.0600674	0.27826	-4.5714
Q64213	0.678122	16.7622	2.01611	0.0601187	0.278285	-4.57215
Q3UHQ6	0.618142	14.9897	2.01475	0.0602735	0.278586	-4.57441
Q9CQ22	0.583519	16.865	2.01474	0.0602758	0.278586	-4.57444
Q9D3P8	1.91174	15.8483	2.01344	0.0604239	0.27881	-4.57659
Q9Z2V5	-1.48759	13.7357	-2.0131	0.0604632	0.27881	-4.57716
Q8BPM0	2.06311	11.9392	2.01307	0.0604668	0.27881	-4.57721
Q9WV34	2.15543	9.8898	2.01271	0.0605088	0.27881	-4.57782
P47809	1.64816	15.3307	2.01218	0.060569	0.278827	-4.57869
Q6PGB6	0.748715	15.5308	2.01158	0.0606381	0.278827	-4.57969
Q9D081	2.39421	12.3933	2.01147	0.0606506	0.278827	-4.57987
P25911	-0.996855	17.3841	-2.01075	0.060734	0.278998	-4.58108
Q61699	0.602821	16.996	2.00978	0.0608462	0.279292	-4.5827
P61358	0.741216	19.3695	2.00882	0.0609567	0.279292	-4.58429
Q811D0	0.734733	16.1549	2.00855	0.0609882	0.279292	-4.58474
Q8QZR5	0.467846	20.6038	2.00789	0.061065	0.279292	-4.58584
O89106	1.27914	14.7321	2.00755	0.0611045	0.279292	-4.58641
P52633	0.446238	16.4799	2.00744	0.0611164	0.279292	-4.58658
Q3UJB9	0.525967	16.2337	2.0074	0.0611212	0.279292	-4.58665
Q9WUM4	0.550999	18.6564	2.0069	0.061179	0.279346	-4.58747
O35678	0.542957	21.3694	2.00594	0.0612917	0.279511	-4.58909
Q8K0C1	0.492026	14.9682	2.0058	0.0613076	0.279511	-4.58931
Q99P72	0.738578	20.5174	2.00539	0.061355	0.279516	-4.58999
Q8BGH4	2.24022	13.0666	2.00466	0.0614403	0.279543	-4.59121
Q9D1H8	2.07137	10.9928	2.0043	0.0614817	0.279543	-4.5918
Q8VD04	1.68454	13.7033	2.00415	0.0614995	0.279543	-4.59205
Q3UMW8	1.51597	13.9991	2.00292	0.0616427	0.279984	-4.59409
Q6PB44	0.579247	16.4799	2.00197	0.0617544	0.280281	-4.59567
Q91YM4	1.78398	14.852	2.00017	0.0619652	0.28082	-4.59865
Q6WVG3	0.560661	18.9067	2.00017	0.0619661	0.28082	-4.59867
A2AJ76	2.49479	13.8413	1.99721	0.0623144	0.281949	-4.60357
Q4ZJN1	2.30969	11.6785	1.99688	0.0623534	0.281949	-4.60412
Q8BG07	0.484223	16.5137	1.99686	0.062355	0.281949	-4.60414
Q9Z1K6	2.83048	13.1941	1.99632	0.0624199	0.282003	-4.60505
Q9JMD0	2.12664	15.5429	1.99598	0.0624601	0.282003	-4.60561
Q71LX4	0.425561	19.159	1.99414	0.0626781	0.282402	-4.60866
P45377	0.584399	16.8413	1.99392	0.0627041	0.282402	-4.60902
P0CG14	1.45008	16.0985	1.99366	0.0627349	0.282402	-4.60945
Q3UQ44	0.679057	17.0779	1.99353	0.0627497	0.282402	-4.60966
Q9CQE1	0.708423	16.3785	1.99326	0.0627819	0.282402	-4.61011
P02798	2.9335	10.2463	1.9872	0.0635058	0.284553	-4.62013
P59017	0.670628	18.5313	1.98832	0.0633719	0.284553	-4.61828
Q6A0D4	1.62045	14.0194	1.98758	0.06346	0.284553	-4.6195
Q9CQW3	3.33825	11.9273	1.987	0.0635298	0.284553	-4.62046
P98156	1.05757	14.3454	1.98693	0.0635383	0.284553	-4.62058
P05555	0.737872	17.1783	1.98663	0.0635752	0.284553	-4.62108
O70145	1.01589	17.1493	1.98651	0.0635893	0.284553	-4.62128
P70671	0.632466	15.4658	1.98595	0.0636559	0.28464	-4.62219
P32883	1.89639	14.77	1.98556	0.0637036	0.284643	-4.62285
P70340	1.64921	15.1558	1.98374	0.0639225	0.285254	-4.62584
Q5U4D8	-1.97127	10.7193	-1.98364	0.0639347	0.285254	-4.62601
Q99L20	-0.708813	16.5496	-1.98228	0.0640991	0.285696	-4.62825
Q3TVC7	1.55893	12.9757	1.98204	0.0641281	0.285696	-4.62865
Q6PDM2	-0.55925	17.6632	-1.9806	0.0643028	0.286113	-4.63102
Q640N3	1.53869	14.8104	1.98022	0.0643496	0.286113	-4.63166
Q9DBH0	2.27484	11.4632	1.9801	0.0643636	0.286113	-4.63185
Q9DBG9	1.46374	16.8668	1.97944	0.0644449	0.286264	-4.63295
P29416	0.602587	17.3797	1.97847	0.0645625	0.286576	-4.63454
Q9D1X0	0.597191	16.3628	1.97754	0.0646763	0.286739	-4.63608
Q9Z130	-1.36286	16.868	-1.97692	0.0647521	0.286739	-4.6371
Q8BG32	0.541608	18.5282	1.97664	0.0647865	0.286739	-4.63756
Q91VM9	-0.497367	15.6724	-1.97662	0.0647888	0.286739	-4.6376
Q8VC12	3.01347	14.0268	1.97543	0.0649336	0.28717	-4.63954
Q3V3R1	1.7596	15.1308	1.97217	0.0653343	0.288731	-4.64491
Q9EPL8	0.410487	17.6404	1.9701	0.06559	0.289631	-4.64832
Q8BG81	2.03849	12.9006	1.96851	0.065787	0.289631	-4.65093
Q8K4T3	-1.38228	9.92185	-1.96806	0.0658425	0.289631	-4.65167
Q8BGD8	1.43003	10.5392	1.96797	0.0658539	0.289631	-4.65182
Q923B0	-1.27623	14.2472	-1.9677	0.0658881	0.289631	-4.65227
Q9ERU9	-0.566567	15.0092	-1.96761	0.0658985	0.289631	-4.65241
Q8R5A3	1.45978	15.3128	1.96705	0.0659684	0.289631	-4.65333
Q923B6	-0.580176	20.2478	-1.96662	0.0660212	0.289631	-4.65403
Q3U6U5	2.21956	9.69853	1.96636	0.0660545	0.289631	-4.65447
Q5U458	-0.577182	15.6528	-1.96625	0.0660677	0.289631	-4.65464
Q63850	-0.626358	14.8768	-1.96512	0.0662086	0.289631	-4.6565
Q9EQK5	0.559741	19.8117	1.96511	0.0662098	0.289631	-4.65652
P28656	0.490674	19.4958	1.96502	0.0662214	0.289631	-4.65667
Q99N96	2.74899	11.0128	1.96482	0.0662453	0.289631	-4.65698
Q9CWQ8	0.593365	15.7019	1.96471	0.0662596	0.289631	-4.65717
P09103	0.51093	21.422	1.96429	0.0663125	0.289631	-4.65787
Q9EST4	0.687689	15.1855	1.96397	0.0663519	0.289631	-4.65839
Q3UBZ5	3.82805	11.4324	1.96327	0.0664395	0.289805	-4.65954
Q9D3D9	-0.664935	20.5783	-1.96281	0.0664972	0.289847	-4.66029
Q80X90	0.492503	19.2368	1.96115	0.0667053	0.290394	-4.66301
Q9CWM4	2.95663	13.0723	1.96104	0.0667185	0.290394	-4.66319
Q91X52	0.691752	16.3772	1.96007	0.0668412	0.290601	-4.66479
Q6KAR6	0.449331	16.272	1.95957	0.0669039	0.290601	-4.6656
Q8VEB4	0.555183	16.8199	1.95952	0.0669103	0.290601	-4.66569
P18760	0.62623	21.2093	1.95902	0.0669735	0.290667	-4.66651
P29533	1.67793	14.5083	1.95844	0.0670466	0.290678	-4.66746
Q3TYX3	0.610807	16.1859	1.95823	0.0670722	0.290678	-4.66779
Q62432	0.427654	17.3446	1.95757	0.0671561	0.290833	-4.66888
Q8BHE8	2.76821	12.6734	1.95677	0.0672566	0.290879	-4.67018
Q9QXE0	0.55374	15.843	1.95663	0.0672752	0.290879	-4.67042
Q9R1T4	-1.21787	12.8358	-1.95598	0.0673574	0.290879	-4.67149
P62889	0.537208	18.7732	1.95597	0.0673589	0.290879	-4.6715
Q8K1A5	1.70639	12.8491	1.9542	0.0675833	0.29164	-4.6744
Q8CHH9	0.67329	16.6337	1.95194	0.0678709	0.292672	-4.6781
Q8BWY3	0.556345	18.7124	1.95144	0.0679341	0.292716	-4.67891
Q99JI4	0.4799	18.0874	1.95079	0.0680172	0.292716	-4.67997
Q06770	0.522534	16.5791	1.95045	0.0680611	0.292716	-4.68053
Q8BVY0	0.641384	13.8379	1.95034	0.0680746	0.292716	-4.6807
Q9QY33	3.0197	12.259	1.94923	0.0682165	0.293118	-4.68251
Q9Z110	0.781658	15.9591	1.94769	0.0684138	0.293757	-4.68503
Q9QZF2	2.05397	13.7028	1.94708	0.0684926	0.293887	-4.68603
Q8C3X8	0.528774	15.6698	1.94561	0.0686814	0.294365	-4.68842
P61600	2.00826	11.9285	1.94546	0.0687013	0.294365	-4.68867
Q91WE6	1.45059	10.0162	1.94427	0.0688539	0.294701	-4.6906
P97447	0.416574	19.0533	1.94352	0.0689513	0.294701	-4.69183
Q8K4Q8	1.23038	16.7179	1.94311	0.0690041	0.294701	-4.6925
Q9CWW6	1.54852	14.2743	1.94296	0.0690244	0.294701	-4.69275
P59325	0.388665	18.2895	1.94245	0.0690902	0.294701	-4.69358
Q91XB0	2.35306	10.8514	1.94239	0.0690982	0.294701	-4.69368
O09106	0.43038	17.4897	1.9422	0.0691218	0.294701	-4.69398
Q05512	1.35503	15.9353	1.94184	0.0691694	0.294701	-4.69457
P59266	0.551426	18.1604	1.9404	0.0693567	0.29529	-4.69692
Q80WW9	2.28461	13.9376	1.93984	0.0694294	0.295392	-4.69783
Q80YV2	2.77699	11.0452	1.93864	0.0695857	0.295849	-4.69979
Q8BU31	-0.794804	14.6367	-1.93821	0.0696417	0.29588	-4.70049
Q9Z210	1.32879	14.3831	1.93683	0.0698216	0.296321	-4.70273
Q9WTQ5	0.420792	17.1387	1.93666	0.0698435	0.296321	-4.703
Q6A4J8	0.61616	15.8282	1.93486	0.0700796	0.297114	-4.70593
Q8BNE1	1.62567	15.0299	1.93398	0.0701957	0.297156	-4.70737
Q9Z1R4	2.69508	11.0323	1.93397	0.0701968	0.297156	-4.70738
P12265	0.832496	17.7641	1.93356	0.0702505	0.297156	-4.70804
Q8CCF0	1.66815	13.9789	1.93312	0.0703078	0.297156	-4.70875
Q3TC72	-0.472019	17.745	-1.93292	0.0703351	0.297156	-4.70909
O70165	1.903	14.285	1.9318	0.0704817	0.297267	-4.7109
O35855	-0.434121	20.6374	-1.93168	0.070498	0.297267	-4.7111
O88824	2.34356	10.5241	1.93144	0.0705292	0.297267	-4.71148
Q8C0C7	0.67568	17.3329	1.93122	0.070558	0.297267	-4.71184
P49070	1.45313	15.6374	1.93064	0.0706357	0.297388	-4.71279
P30115	-0.774846	19.9188	-1.9301	0.0707061	0.297477	-4.71366
Q8BYY4	1.77501	13.7146	1.92808	0.0709737	0.298395	-4.71693
Q91ZN5	1.77319	14.8935	1.92655	0.0711781	0.298425	-4.71943
Q91VN6	1.50767	10.1674	1.92728	0.0710804	0.298425	-4.71824
Q922B2	0.443205	19.7491	1.927	0.0711173	0.298425	-4.71869
Q9D646	-1.66232	10.9442	-1.9266	0.0711707	0.298425	-4.71934
Q9CR09	0.552152	18.0183	1.92459	0.0714391	0.299312	-4.7226
Q9R0M4	-1.91522	13.9877	-1.92333	0.0716076	0.299619	-4.72464
P14685	0.435919	17.3332	1.9233	0.0716114	0.299619	-4.72469
Q8JZQ9	0.375147	18.1083	1.92262	0.0717015	0.299652	-4.72578
Q9CY45	2.6307	14.174	1.9225	0.0717183	0.299652	-4.72598
Q9CQP2	1.63461	14.99	1.92211	0.0717703	0.299662	-4.72661
P42227	0.544989	15.3615	1.92173	0.071822	0.299671	-4.72724
Q9QZ23	0.506805	17.0078	1.92072	0.0719574	0.300029	-4.72887
P50096	0.697657	15.9981	1.91974	0.0720886	0.300369	-4.73045
Q9Z2L7	2.10729	18.2194	1.91917	0.0721654	0.300482	-4.73137
Q9WU28	2.18243	10.157	1.91826	0.0722887	0.300668	-4.73285
Q9CQE7	-1.75098	14.9567	-1.9181	0.0723094	0.300668	-4.7331
Q9CQI6	0.893348	20.1559	1.9161	0.0725805	0.301404	-4.73634
Q3UND0	2.50643	11.9024	1.91606	0.072586	0.301404	-4.73641
Q8CDJ8	2.41929	11.1639	1.91434	0.0728192	0.302165	-4.73918
Q91V12	0.645242	18.3158	1.91258	0.0730575	0.302545	-4.74201
P08553	2.16674	15.7177	1.91202	0.073134	0.302545	-4.74292
Q9ES28	2.2489	17.3154	1.91182	0.073162	0.302545	-4.74325
Q2KN98	-0.737234	17.1798	-1.9118	0.0731649	0.302545	-4.74328
A2AAY5	0.627541	16.0362	1.91176	0.0731693	0.302545	-4.74334
P27641	2.46612	13.9705	1.91146	0.073211	0.302545	-4.74383
P49138	1.95842	14.3101	1.91077	0.0733054	0.302729	-4.74494
Q6IMF0	-1.45233	11.4104	-1.90959	0.0734662	0.303186	-4.74684
Q9ESP1	2.2332	13.465	1.90922	0.0735165	0.303187	-4.74743
Q9ERS5	1.28229	14.5713	1.90854	0.0736098	0.303365	-4.74853
Q6IRU5	0.465666	18.9035	1.90777	0.0737151	0.303584	-4.74977
P61219	1.24488	10.0528	1.90742	0.0737635	0.303584	-4.75034
P28474	-0.440451	19.135	-1.90703	0.0738175	0.303595	-4.75097
Q61584	1.41804	14.1051	1.90651	0.073889	0.303595	-4.75181
O54931	0.533031	17.938	1.90631	0.0739166	0.303595	-4.75213
O55042	-0.792748	15.8236	-1.90482	0.0741212	0.304072	-4.75452
O70503	0.545885	20.0856	1.90474	0.0741333	0.304072	-4.75466
Q8K0D5	0.45179	16.5295	1.90403	0.0742306	0.304265	-4.7558
Q3UD01	1.35909	15.8994	1.90238	0.0744588	0.304947	-4.75845
P67984	0.52346	19.5818	1.90117	0.0746261	0.304947	-4.76039
Q6P542	0.4924	16.7328	1.90104	0.0746442	0.304947	-4.7606
Q8BXC6	0.609504	17.2884	1.90074	0.0746859	0.304947	-4.76108
Q8K2C7	2.03283	15.3552	1.90025	0.0747547	0.304947	-4.76188
Q64133	0.544479	19.4769	1.89976	0.0748233	0.304947	-4.76267
Q6URW6	0.838318	16.8711	1.89952	0.0748554	0.304947	-4.76304
Q9JLR1	1.78148	16.5241	1.8995	0.0748591	0.304947	-4.76309
P62342	0.566165	16.3841	1.89935	0.07488	0.304947	-4.76333
P52432	2.3793	14.1363	1.8992	0.0749012	0.304947	-4.76357
Q8CHP8	0.496488	17.8591	1.89823	0.0750364	0.305293	-4.76513
Q9D8E6	0.447715	18.6416	1.89691	0.0752201	0.305698	-4.76724
Q9D898	0.550804	17.5555	1.89667	0.0752538	0.305698	-4.76763
A2AR02	1.64673	13.2079	1.89643	0.0752876	0.305698	-4.76802
Q8BH57	2.20661	13.4343	1.89548	0.0754194	0.305835	-4.76953
Q91VD1	-0.432565	17.9903	-1.89546	0.0754224	0.305835	-4.76956
Q9Z211	2.11959	11.766	1.89343	0.075708	0.306787	-4.77283
Q60928	-1.79028	12.4999	-1.893	0.0757689	0.306829	-4.77352
Q61152	0.733865	14.3291	1.89204	0.0759039	0.30717	-4.77506
Q922B1	-0.530819	15.5338	-1.89126	0.0760132	0.307183	-4.7763
P28654	-0.745739	20.8931	-1.89124	0.0760166	0.307183	-4.77634
P97311	1.99635	14.5212	1.89093	0.0760595	0.307183	-4.77683
Q9CZH3	1.70154	13.4512	1.8905	0.0761201	0.307223	-4.77752
O70493	0.707577	17.6767	1.89009	0.0761788	0.307255	-4.77818
Q8R1K1	2.38487	11.9009	1.8897	0.0762331	0.307269	-4.7788
P50516	0.671814	19.2467	1.88794	0.0764835	0.308073	-4.78163
P10833	-0.487525	20.9481	-1.88745	0.0765533	0.308149	-4.78241
Q6PHU5	-0.392931	17.8119	-1.88691	0.0766292	0.308243	-4.78327
Q5RJG7	2.18859	12.8623	1.88656	0.0766787	0.308243	-4.78383
P22366	0.785648	15.5099	1.88451	0.0769709	0.308714	-4.78711
O88958	0.681948	16.9478	1.88443	0.0769818	0.308714	-4.78723
P00687	-0.55831	15.0218	-1.88434	0.076996	0.308714	-4.78739
P00416	2.63544	12.6672	1.88411	0.0770287	0.308714	-4.78775
O08532	-1.67377	13.8421	-1.88395	0.0770509	0.308714	-4.788
Q99JX4	0.510838	16.2231	1.8808	0.0775015	0.310294	-4.79303
O88448	1.93585	16.1935	1.88033	0.0775695	0.310294	-4.79379
Q9CWZ3	1.76787	16.0778	1.88012	0.0775991	0.310294	-4.79412
Q8BKE6	0.588512	15.9795	1.87832	0.0778587	0.311104	-4.797
O70362	0.559769	18.2068	1.87756	0.0779687	0.311104	-4.79821
Q61207	1.14582	20.3595	1.87754	0.0779708	0.311104	-4.79824
Q8CEC6	1.94177	11.7885	1.87729	0.0780074	0.311104	-4.79864
P05132	0.402964	18.4884	1.8758	0.0782219	0.311754	-4.80101
Q8R1F1	0.894998	17.8545	1.8748	0.0783676	0.311928	-4.80261
Q5NCF2	0.457051	17.4992	1.87479	0.0783687	0.311928	-4.80262
P08228	-0.398924	23.1208	-1.87417	0.0784587	0.312081	-4.80361
O88630	-1.64445	20.916	-1.873	0.0786287	0.312552	-4.80547
Q61024	-0.396328	18.0023	-1.87256	0.0786931	0.312602	-4.80618
Q9WTP7	0.492607	19.4713	1.87057	0.0789826	0.313367	-4.80934
Q80TQ5	2.97112	12.5029	1.87053	0.0789891	0.313367	-4.80941
Q6PNC0	1.92904	13.4656	1.87006	0.0790565	0.313429	-4.81015
Q80TY0	1.15778	15.5853	1.86908	0.0792	0.313765	-4.81171
P47757	0.456742	20.1838	1.86877	0.0792452	0.313765	-4.8122
Q8VED9	1.19192	15.0435	1.86803	0.0793541	0.313875	-4.81338
Q8CDG3	0.526919	14.7537	1.86753	0.0794271	0.313875	-4.81417
O35382	0.474729	16.5832	1.86752	0.0794286	0.313875	-4.81419
Q3TWI9	1.18832	9.55974	1.86669	0.0795515	0.314156	-4.81552
P62821	0.426021	20.4864	1.86624	0.0796176	0.314212	-4.81623
P47963	0.665981	19.2999	1.86363	0.0800018	0.315522	-4.82038
Q8C754	0.666768	16.1378	1.8624	0.0801836	0.315989	-4.82233
O88968	0.796828	15.6881	1.86143	0.0803268	0.315989	-4.82386
Q99L27	0.557923	16.8908	1.8614	0.0803315	0.315989	-4.82391
P35283	1.28867	15.2211	1.86112	0.0803727	0.315989	-4.82435
P51569	2.48561	13.8578	1.86106	0.0803813	0.315989	-4.82445
P60060	1.4235	15.5766	1.86065	0.0804426	0.316025	-4.8251
P07934	-1.6714	11.2446	-1.85921	0.0806561	0.316658	-4.82738
Q6DFW4	1.22116	15.5287	1.85831	0.0807901	0.316978	-4.82881
Q8BU85	0.392496	16.8552	1.85768	0.0808842	0.317142	-4.82981
Q8R0N6	-0.51198	17.3064	-1.85695	0.0809926	0.317361	-4.83096
Q62351	0.479139	15.3778	1.85605	0.081127	0.317389	-4.83238
P16125	-0.535682	19.5642	-1.85576	0.0811711	0.317389	-4.83285
Q61753	0.423166	22.9038	1.85565	0.0811869	0.317389	-4.83302
Q3TBD2	2.43679	13.0763	1.8555	0.0812095	0.317389	-4.83326
Q8CJ53	-0.42241	15.7047	-1.85467	0.0813337	0.317455	-4.83457
P83917	1.98246	10.8422	1.85443	0.0813699	0.317455	-4.83495
Q01730	0.556009	18.6285	1.85434	0.081384	0.317455	-4.8351
P97861	-3.11017	12.4681	-1.85347	0.0815146	0.317508	-4.83648
Q80UP3	3.41342	14.7811	1.85285	0.0816078	0.317508	-4.83746
Q8C6G8	0.503448	15.8578	1.85263	0.0816406	0.317508	-4.8378
Q9D2C7	0.600373	14.7403	1.85259	0.0816456	0.317508	-4.83786
Q9CVB6	0.628943	18.7493	1.8525	0.0816598	0.317508	-4.83801
Q8K2Q0	0.560275	15.5317	1.85163	0.0817905	0.317689	-4.83938
Q9Z0X1	-0.464665	17.7896	-1.85149	0.0818116	0.317689	-4.8396
Q9QY81	1.77072	13.425	1.85093	0.0818955	0.317811	-4.84048
P09581	0.491217	16.9632	1.84887	0.0822068	0.318433	-4.84374
Q8VCF1	3.9368	13.7347	1.84904	0.0821814	0.318433	-4.84347
Q8R366	-0.530628	16.6817	-1.84883	0.0822137	0.318433	-4.84381
P49710	0.867557	18.1028	1.84783	0.0823646	0.318758	-4.84538
Q61475	2.59983	13.311	1.84743	0.0824255	0.318758	-4.84602
P22892	0.460098	17.8743	1.84707	0.0824802	0.318758	-4.84659
Q9R190	0.543304	15.9853	1.84688	0.0825083	0.318758	-4.84688
P29452	0.712374	15.3788	1.8447	0.0828392	0.319654	-4.85032
Q8BSE0	2.67225	15.2734	1.84452	0.0828673	0.319654	-4.85061
O88384	0.765974	15.7405	1.84431	0.0828987	0.319654	-4.85093
Q99JX7	2.69451	12.6366	1.84211	0.0832356	0.320749	-4.85441
Q9CXF4	0.470533	17.4558	1.84123	0.0833696	0.32106	-4.85579
Q6ZPJ0	1.92527	10.6474	1.83968	0.0836081	0.321711	-4.85824
Q61543	0.63443	16.9444	1.83944	0.0836449	0.321711	-4.85862
P70697	0.480191	16.836	1.83714	0.0839975	0.322862	-4.86222
Q61335	1.03052	16.6414	1.83656	0.0840875	0.323003	-4.86314
P15066	2.03119	15.4098	1.83481	0.0843583	0.323837	-4.86589
Q00560	-0.925745	15.7154	-1.83363	0.0845411	0.324333	-4.86775
Q9JHI7	1.28443	14.9013	1.83303	0.0846331	0.324461	-4.86868
Q922J9	1.14259	14.4627	1.83272	0.0846815	0.324461	-4.86917
Q8VC42	0.52085	15.2228	1.83197	0.0847987	0.324704	-4.87035
P97310	1.59837	15.453	1.83056	0.0850177	0.325336	-4.87256
Q5I2A0	2.09026	14.7041	1.8283	0.0853703	0.326479	-4.87611
Q8VDI9	3.24658	12.1077	1.827	0.0855739	0.327039	-4.87814
O70293	2.42557	12.8612	1.82662	0.0856343	0.327039	-4.87875
Q99PI5	1.7287	17.5467	1.82633	0.0856788	0.327039	-4.87919
Q3TLI0	-2.85472	19.7061	-1.8248	0.08592	0.327753	-4.8816
Q61211	2.32299	10.5092	1.82322	0.0861685	0.328494	-4.88407
Q8BJU0	0.5035	18.0546	1.82067	0.0865704	0.329482	-4.88805
O35640	1.14067	15.2461	1.82012	0.0866585	0.329482	-4.88892
Q9D125	1.57868	9.85072	1.81954	0.0867504	0.329482	-4.88982
Q91Z38	2.15243	14.27	1.81943	0.0867678	0.329482	-4.89
Q9JKV5	-1.90684	14.3341	-1.81922	0.0868006	0.329482	-4.89032
Q62406	1.89712	12.9032	1.81898	0.0868389	0.329482	-4.8907
P10649	0.556989	22.2664	1.81898	0.0868392	0.329482	-4.8907
Q8K0C4	0.732597	17.0963	1.81882	0.0868635	0.329482	-4.89094
Q8R5H1	0.371794	15.8067	1.81828	0.0869495	0.329591	-4.89178
Q8BGS2	0.935691	15.5803	1.81796	0.0870012	0.329591	-4.89229
Q8VDN2	-0.78135	18.8746	-1.81696	0.0871596	0.329985	-4.89385
Q3TTY5	-0.59498	18.0255	-1.81525	0.0874326	0.330811	-4.89652
Q8BIJ6	-0.399645	17.917	-1.81454	0.0875458	0.330914	-4.89762
P20065	1.47194	16.5038	1.8144	0.0875693	0.330914	-4.89785
Q64487	-2.88976	10.8397	-1.81404	0.0876263	0.330923	-4.89841
P97479	-1.61866	15.6742	-1.81334	0.0877388	0.331035	-4.8995
P48774	-0.892755	17.8524	-1.81317	0.0877654	0.331035	-4.89976
Q5XKE0	2.16408	8.67233	1.81264	0.08785	0.331148	-4.90059
P11679	-2.11517	16.6077	-1.812	0.0879537	0.331274	-4.90159
Q9CQU0	0.633352	18.0787	1.81175	0.087993	0.331274	-4.90198
P21550	-0.903231	18.0341	-1.8114	0.0880487	0.331278	-4.90252
Q9QYG0	0.500323	19.8413	1.81035	0.0882179	0.331708	-4.90415
O89013	-0.6162	14.5203	-1.80994	0.0882841	0.331751	-4.90479
Q8VHN8	2.60111	13.2256	1.80942	0.0883687	0.331863	-4.90561
Q8R3Q6	0.844106	9.52947	1.80881	0.0884662	0.332022	-4.90655
Q8CIZ8	0.777978	14.7769	1.80728	0.0887137	0.332539	-4.90894
O55236	1.71341	11.8846	1.80735	0.0887028	0.332539	-4.90883
Q99PL5	0.345806	19.4087	1.80573	0.0889647	0.333274	-4.91135
Q3UFK8	0.519685	15.8617	1.80424	0.0892068	0.333761	-4.91367
Q8C8U0	0.426763	15.9523	1.80399	0.0892476	0.333761	-4.91406
Q8BLU0	2.2653	13.399	1.80386	0.0892681	0.333761	-4.91425
Q6PHN9	0.42884	17.3321	1.80357	0.0893157	0.333761	-4.91471
Q6ZQH8	0.51318	15.2259	1.80282	0.0894367	0.333848	-4.91586
Q80VI1	1.23204	14.1692	1.80252	0.0894868	0.333848	-4.91634
Q9EPC5	0.846334	14.3114	1.80212	0.0895515	0.333848	-4.91696
Q923G2	1.89107	14.7437	1.80207	0.0895595	0.333848	-4.91703
Q9JLV5	0.432636	16.5459	1.80145	0.0896613	0.334022	-4.918
Q8R4H2	0.434898	15.2427	1.8005	0.0898156	0.33439	-4.91947
Q6P6L0	2.16616	11.8396	1.79862	0.0901234	0.335144	-4.92238
P51163	0.521038	17.2716	1.79859	0.0901287	0.335144	-4.92243
Q63918	0.467297	22.1472	1.79655	0.0904641	0.336184	-4.9256
Q8BXV2	1.97259	13.3328	1.79614	0.0905323	0.336231	-4.92624
Q9D0I9	0.372916	17.9641	1.79458	0.0907882	0.336975	-4.92864
Q9Z2T6	-1.57674	15.6921	-1.79375	0.0909265	0.337281	-4.92994
Q9WVA2	0.586726	16.8906	1.79331	0.0909984	0.337341	-4.93061
Q8CAA7	1.47612	14.4074	1.79257	0.0911215	0.337552	-4.93176
Q8VED5	-1.37396	16.0717	-1.79229	0.0911669	0.337552	-4.93219
P97927	-0.579446	19.2363	-1.79182	0.0912451	0.337635	-4.93292
Q7TMM9	1.19091	17.6852	1.79115	0.0913558	0.337838	-4.93395
O54734	-0.420176	19.7573	-1.79031	0.0914953	0.338147	-4.93525
Q9QZB9	0.449129	16.2608	1.78983	0.0915755	0.338237	-4.936
Q8R086	-0.68313	16.9605	-1.78937	0.0916524	0.338314	-4.93671
Q8BK62	-1.98221	9.73196	-1.78887	0.0917358	0.338364	-4.93748
Q9CZ52	3.61997	12.2564	1.78862	0.0917778	0.338364	-4.93787
O88520	1.98461	12.5938	1.7874	0.0919812	0.338908	-4.93976
Q99N57	0.996761	14.8776	1.78649	0.0921334	0.338914	-4.94116
O88522	1.29163	13.9991	1.78645	0.0921394	0.338914	-4.94122
Q8BMG7	0.367893	18.0641	1.78616	0.0921877	0.338914	-4.94166
P47934	-0.436298	18.0793	-1.78604	0.0922071	0.338914	-4.94184
Q3UGC7	0.448684	17.1956	1.78558	0.0922853	0.338996	-4.94256
Q8R2Q8	-0.76282	16.9391	-1.78497	0.0923878	0.339166	-4.94351
P04441	1.30953	15.4099	1.78447	0.0924708	0.339265	-4.94427
P61226	-0.534736	17.0054	-1.78265	0.0927763	0.34018	-4.94708
O70310	0.463694	17.0316	1.78194	0.0928963	0.340413	-4.94818
Q60575	0.471566	15.2031	1.7812	0.0930215	0.340666	-4.94932
Q7M6Y3	0.443981	18.9221	1.78047	0.0931444	0.34071	-4.95044
Q99PP9	1.29372	16.6408	1.78046	0.0931461	0.34071	-4.95046
Q8VDD5	0.438327	21.1079	1.77985	0.0932482	0.340877	-4.95139
P70318	0.773424	15.2727	1.77941	0.0933237	0.340947	-4.95208
Q99L43	-0.382113	17.1792	-1.77788	0.0935825	0.341686	-4.95443
Q9QUM9	0.408029	19.6764	1.77718	0.0937015	0.341914	-4.95551
Q9D1J1	0.582819	16.8429	1.77672	0.0937783	0.341988	-4.95621
P51410	0.355254	17.1219	1.77612	0.09388	0.342153	-4.95713
Q8VHL1	1.06567	16.5374	1.77534	0.0940139	0.342296	-4.95834
Q9CZC8	1.91343	13.5643	1.77506	0.094062	0.342296	-4.95877
P53395	-0.390355	18.0644	-1.7749	0.0940891	0.342296	-4.95902
O35604	1.29263	15.8984	1.77415	0.0942159	0.342552	-4.96016
P14115	0.558701	20.369	1.7737	0.0942922	0.342623	-4.96085
P60710	0.571701	23.0107	1.77326	0.0943686	0.34269	-4.96153
Q8CHR6	-1.22106	14.5615	-1.77293	0.0944238	0.34269	-4.96203
Q8K021	2.07134	12.6548	1.77207	0.0945708	0.342823	-4.96335
B2RXC1	0.404413	16.9648	1.77206	0.0945738	0.342823	-4.96338
Q9JM76	0.780895	19.3773	1.77152	0.094666	0.342855	-4.96421
Q8BUV3	-0.34611	17.3455	-1.77111	0.0947357	0.342855	-4.96483
Q9QZQ1	0.406025	16.5779	1.77091	0.0947695	0.342855	-4.96513
Q9CXD6	2.63408	12.852	1.77005	0.0949174	0.342855	-4.96646
Q8VC03	0.518974	15.0902	1.7698	0.0949604	0.342855	-4.96684
Q6PIP5	1.10741	14.8024	1.76949	0.0950134	0.342855	-4.96731
O88986	-1.5099	14.9237	-1.76941	0.095027	0.342855	-4.96744
P63213	1.45994	16.0614	1.76936	0.0950359	0.342855	-4.96751
P21812	-0.891724	19.0712	-1.76802	0.0952661	0.343416	-4.96957
Q9DC70	-0.487417	18.2978	-1.7678	0.095305	0.343416	-4.96991
Q9ERL7	2.03423	11.699	1.76634	0.0955563	0.343855	-4.97215
Q9JIQ3	2.31992	11.336	1.7663	0.0955624	0.343855	-4.9722
P54763	1.0671	14.8072	1.76583	0.0956441	0.343855	-4.97293
Q91WI7	3.66553	14.567	1.76563	0.0956792	0.343855	-4.97324
P18419	-4.66676	15.8082	-1.76544	0.0957112	0.343855	-4.97352
Q640N1	0.7809	16.8119	1.76487	0.0958101	0.344007	-4.9744
P36536	0.459281	16.6202	1.76452	0.0958704	0.344019	-4.97493
P25206	1.35491	13.8648	1.76374	0.0960053	0.344029	-4.97612
O08736	2.01408	13.222	1.76369	0.096015	0.344029	-4.97621
Q3UHH8	1.44292	14.3569	1.76352	0.0960438	0.344029	-4.97646
Q07113	0.559528	16.7699	1.76239	0.0962404	0.344166	-4.9782
Q61542	1.23026	13.223	1.7629	0.0961519	0.344166	-4.97741
Q3TRM8	1.78312	14.6071	1.76232	0.0962527	0.344166	-4.9783
Q62073	0.770879	9.95158	1.76164	0.09637	0.344382	-4.97934
Q8BFP9	-0.539183	15.5481	-1.76095	0.0964907	0.344609	-4.9804
Q5SWT3	-0.409826	16.9531	-1.75911	0.0968112	0.344671	-4.98321
P07356	0.445393	23.9107	1.76027	0.0966086	0.344671	-4.98143
P23249	2.08481	12.9695	1.75902	0.0968267	0.344671	-4.98334
Q9CX86	-0.643717	16.218	-1.75867	0.0968877	0.344671	-4.98387
O35609	0.495779	16.6326	1.75865	0.0968913	0.344671	-4.98391
Q8BUK6	0.463424	16.7585	1.75836	0.0969417	0.344671	-4.98435
P58044	0.47759	15.0253	1.75815	0.0969799	0.344671	-4.98468
Q9QZI9	2.30586	12.2714	1.75798	0.0970087	0.344671	-4.98493
Q9CYH2	0.48859	20.3133	1.75791	0.0970207	0.344671	-4.98504
Q640P4	2.2242	10.298	1.75701	0.097178	0.344883	-4.98641
Q9JHW2	-0.447743	17.6959	-1.75692	0.0971942	0.344883	-4.98655
Q9R020	1.93012	14.4652	1.7555	0.0974426	0.345499	-4.98871
P97858	1.3497	14.187	1.75528	0.0974822	0.345499	-4.98906
P59235	1.53487	15.4182	1.75476	0.0975736	0.345621	-4.98985
Q91WC9	0.948835	16.5282	1.75372	0.0977571	0.345866	-4.99144
P15261	1.62034	11.8492	1.75385	0.0977337	0.345866	-4.99124
Q9QUR6	0.412317	18.4027	1.75317	0.097853	0.346003	-4.99227
Q8VE95	-0.450784	16.8625	-1.75282	0.0979152	0.34602	-4.99281
Q60967	-0.530053	15.4263	-1.7524	0.0979889	0.346079	-4.99344
Q61072	1.56117	13.698	1.75188	0.098081	0.346202	-4.99424
P26928	1.98606	12.9456	1.75137	0.0981712	0.346318	-4.99502
O35459	0.542676	19.6628	1.74964	0.0984773	0.347112	-4.99765
P20152	0.640067	24.9669	1.74945	0.0985109	0.347112	-4.99794
P13634	0.414326	19.7823	1.7488	0.0986257	0.347314	-4.99892
Q8BWW9	0.83876	14.565	1.74836	0.098704	0.347388	-4.99959
Q9Z2I8	-0.51149	16.0642	-1.74685	0.0989731	0.347983	-5.0019
Q9DC69	-0.401385	17.2911	-1.74676	0.0989882	0.347983	-5.00203
P21300	-0.926754	18.6936	-1.74547	0.0992181	0.348589	-5.00399
Q8JZQ5	-2.41653	12.912	-1.74392	0.0994951	0.349359	-5.00634
Q7TSC1	1.8632	14.5487	1.74342	0.0995844	0.34947	-5.0071
A2A8Z1	0.432923	16.3926	1.74252	0.0997463	0.349794	-5.00847
O35448	1.05778	15.3417	1.74195	0.0998486	0.349794	-5.00934
Q5F2E8	0.577503	15.6614	1.74194	0.0998503	0.349794	-5.00935
Q8BFR5	-0.380981	19.5651	-1.74147	0.0999334	0.349854	-5.01006
Q5SWD9	2.24104	11.1716	1.7412	0.0999831	0.349854	-5.01048
Q8BIQ5	0.490892	16.2993	1.73937	0.100312	0.350468	-5.01325
P43025	0.617132	16.1375	1.73923	0.100337	0.350468	-5.01346
Q9JK38	0.630639	14.091	1.7389	0.100396	0.350468	-5.01396
Q9Z0N2	0.403845	18.8751	1.73871	0.10043	0.350468	-5.01425
O08734	0.653613	16.1119	1.73861	0.100448	0.350468	-5.0144
O55091	1.18467	15.6666	1.7379	0.100577	0.350714	-5.01547
P13707	0.432503	22.0889	1.73752	0.100646	0.350754	-5.01606
Q8CGC6	2.09652	11.6035	1.73616	0.100891	0.351404	-5.01811
P55096	0.511797	17.9136	1.73391	0.101299	0.351858	-5.02152
Q6ZQI3	0.398313	18.1095	1.73487	0.101124	0.351858	-5.02006
Q69ZS7	1.83376	13.9013	1.7344	0.10121	0.351858	-5.02078
Q63829	0.461582	17.1491	1.73427	0.101233	0.351858	-5.02097
Q8BJ63	0.466652	15.2037	1.73384	0.101312	0.351858	-5.02162
Q9ERL9	0.43115	15.1065	1.73301	0.101463	0.352182	-5.02288
P81117	0.652197	16.4684	1.73264	0.101531	0.352215	-5.02345
Q8CAK1	1.61711	15.2815	1.73127	0.101781	0.352878	-5.02552
Q9DBL7	0.438331	19.1624	1.73025	0.101965	0.353315	-5.02704
Q9CWU6	1.75187	13.3898	1.72987	0.102036	0.353357	-5.02763
Q9D958	1.80734	13.2538	1.72904	0.102186	0.353677	-5.02887
Q58A65	0.420182	17.0224	1.72691	0.102577	0.354543	-5.03209
O70370	1.39896	16.0951	1.72628	0.102693	0.354543	-5.03304
P58871	0.342693	17.6885	1.72611	0.102725	0.354543	-5.0333
Q8C7V8	1.18971	10.8805	1.72608	0.102729	0.354543	-5.03334
Q8C025	0.698047	20.7927	1.72601	0.102743	0.354543	-5.03345
P18052	-0.436684	16.9792	-1.72576	0.102788	0.354543	-5.03382
Q3U0S6	0.443999	17.0984	1.72487	0.102952	0.354907	-5.03516
Q8R3S6	1.4121	15.7122	1.72427	0.103064	0.355016	-5.03608
P58389	0.443379	19.175	1.72404	0.103105	0.355016	-5.03642
P08101	1.29489	16.0077	1.72372	0.103164	0.355016	-5.0369
P54923	0.52213	16.8924	1.72343	0.103219	0.355016	-5.03734
Q921W0	1.02898	16.6306	1.72125	0.103621	0.355892	-5.04062
Q91YL2	-0.75445	15.2329	-1.7208	0.103704	0.355892	-5.0413
Q6PDI5	0.416484	16.5965	1.7206	0.103741	0.355892	-5.04159
Q3UNZ8	-0.401532	16.054	-1.72025	0.103806	0.355892	-5.04212
Q4VAA2	0.440111	17.7409	1.71978	0.103894	0.355892	-5.04283
Q3TP92	1.85945	12.2875	1.71975	0.103899	0.355892	-5.04288
Q8C033	1.64312	12.463	1.71975	0.1039	0.355892	-5.04288
Q6PAV2	0.47091	15.0949	1.71951	0.103944	0.355892	-5.04324
P62270	0.590297	20.1919	1.71745	0.104328	0.356877	-5.04634
Q80YT7	1.72565	12.5139	1.71733	0.10435	0.356877	-5.04652
P21956	0.724451	16.4941	1.7164	0.104524	0.357204	-5.04792
Q8BWM0	0.466016	15.0437	1.71609	0.104581	0.357204	-5.04838
Q9QUM0	2.80241	14.3276	1.71587	0.104622	0.357204	-5.04871
Q62470	-2.29192	14.264	-1.71546	0.104699	0.357207	-5.04933
Q05BC3	0.836266	16.1378	1.71499	0.104786	0.357207	-5.05003
Q9Z0G0	1.40556	13.0363	1.71492	0.1048	0.357207	-5.05014
P97807	-0.380276	18.2285	-1.71405	0.104963	0.357418	-5.05145
P46656	-0.651204	18.1376	-1.71396	0.10498	0.357418	-5.05159
Q8BH31	0.638023	16.1417	1.7133	0.105104	0.357511	-5.05257
Q9D6I7	1.7112	11.6543	1.71296	0.105168	0.357511	-5.05309
Q9R0G7	1.69575	13.7046	1.71283	0.105191	0.357511	-5.05327
P43276	0.571455	19.9925	1.71255	0.105244	0.357511	-5.0537
Q9DBY1	1.09079	16.1042	1.70725	0.106244	0.35986	-5.06164
Q64FW2	0.549015	16.5414	1.70717	0.106258	0.35986	-5.06175
Q3UMR5	4.0553	13.0295	1.70675	0.106338	0.35986	-5.06239
P50580	0.44261	19.1411	1.70615	0.10645	0.35986	-5.06327
Q02105	0.687129	16.689	1.7057	0.106536	0.35986	-5.06395
P17897	-0.458226	10.3005	-1.7055	0.106575	0.35986	-5.06426
Q9JMH9	0.595352	15.5998	1.70526	0.10662	0.35986	-5.06461
Q3THE2	0.53318	20.1791	1.70525	0.106622	0.35986	-5.06462
Q9QZ06	0.342726	17.1598	1.70509	0.106652	0.35986	-5.06487
P60229	0.497912	17.1768	1.70492	0.106685	0.35986	-5.06512
Q9DBN4	1.78846	10.4185	1.7049	0.106689	0.35986	-5.06515
Q99LX5	1.67332	10.6615	1.70482	0.106705	0.35986	-5.06528
Q8BSN5	1.28788	9.54943	1.70479	0.106709	0.35986	-5.06531
Q8BNI4	1.43804	15.864	1.70427	0.106808	0.359875	-5.06609
P97760	2.36667	15.6662	1.70414	0.106832	0.359875	-5.06628
Q62086	0.373428	17.6714	1.70252	0.107142	0.360717	-5.06871
Q99J83	0.490506	15.7435	1.70211	0.107219	0.360771	-5.06931
Q60809	1.90481	11.029	1.70181	0.107277	0.360771	-5.06977
Q9JI91	0.517441	17.0447	1.70145	0.107345	0.3608	-5.0703
Q8BX80	0.486772	16.328	1.70079	0.107471	0.361022	-5.07128
Q9R0Q1	-2.28062	11.7318	-1.70048	0.107532	0.361026	-5.07176
Q8K2M0	0.757221	14.524	1.69951	0.107716	0.361444	-5.0732
Q8K1N1	0.640984	15.4928	1.69855	0.107902	0.361865	-5.07464
Q505D9	1.84526	13.866	1.69674	0.108248	0.362827	-5.07733
Q9D159	-1.62236	14.3154	-1.6959	0.10841	0.363168	-5.07858
Q3U829	2.85603	12.6889	1.69517	0.108551	0.363226	-5.07967
P61965	2.72135	10.6478	1.69504	0.108575	0.363226	-5.07986
P41105	-0.926447	17.6297	-1.6948	0.108623	0.363226	-5.08023
Q01768	0.491127	22.2769	1.69457	0.108668	0.363226	-5.08057
P49222	1.65577	14.8804	1.69381	0.108813	0.36351	-5.08169
Q925H3	-1.05992	12.804	-1.69305	0.10896	0.363699	-5.08282
O08585	0.562727	20.2867	1.6929	0.108989	0.363699	-5.08305
Q99NH0	1.05754	14.6258	1.69161	0.109239	0.36415	-5.08496
Q3UVL4	0.455735	16.0945	1.69158	0.109245	0.36415	-5.08501
Q9D8W5	0.421697	17.1396	1.69016	0.109521	0.364755	-5.08712
Q8R4G6	2.11439	11.7489	1.69002	0.109547	0.364755	-5.08733
O08919	0.682716	15.1652	1.68968	0.109615	0.36478	-5.08784
Q8K268	0.400756	15.2562	1.68878	0.10979	0.365014	-5.08918
Q8BMK4	0.722709	15.568	1.68869	0.109806	0.365014	-5.0893
Q9EPJ9	1.01379	15.3523	1.6862	0.110293	0.366274	-5.09301
P07724	0.721532	25.5349	1.68584	0.110363	0.366274	-5.09354
E5FYH1	-2.26515	12.8959	-1.68582	0.110366	0.366274	-5.09356
P09242	-2.50386	11.2268	-1.68493	0.11054	0.36646	-5.09488
P50608	-0.793817	17.1166	-1.68486	0.110556	0.36646	-5.095
O89032	0.772539	16.0573	1.68461	0.110604	0.36646	-5.09537
Q99L48	1.93218	10.2818	1.68362	0.110798	0.366759	-5.09683
Q91WP6	0.605312	18.5788	1.68331	0.110859	0.366759	-5.09729
Q6ZQL4	2.15619	12.5944	1.68301	0.110919	0.366759	-5.09774
P14206	0.412449	21.1598	1.68291	0.110937	0.366759	-5.09788
Q91YI0	-0.607271	16.5919	-1.68242	0.111034	0.366879	-5.09861
P13516	-0.482244	17.6481	-1.6814	0.111234	0.367148	-5.10011
O54782	1.30384	16.104	1.68101	0.111311	0.367148	-5.1007
P06800	0.660143	17.2117	1.68095	0.111324	0.367148	-5.10079
Q9DBG1	-0.587457	16.4171	-1.68077	0.111358	0.367148	-5.10105
Q8BU30	0.463699	18.4096	1.68005	0.1115	0.367287	-5.10212
Q6P5D8	0.482903	15.1768	1.67994	0.111522	0.367287	-5.10228
Q8JZU0	1.11387	13.968	1.67909	0.11169	0.36764	-5.10353
O88895	2.41931	14.011	1.67867	0.111773	0.367648	-5.10416
P22682	0.671737	15.1435	1.67817	0.111872	0.367648	-5.1049
P28063	0.466917	18.4678	1.67816	0.111874	0.367648	-5.10492
O35969	0.478324	18.0157	1.67734	0.112036	0.367785	-5.10613
Q9CQG1	1.61843	10.0031	1.67731	0.112043	0.367785	-5.10618
P97426	2.17784	13.1725	1.67703	0.112098	0.367785	-5.10659
P58064	-0.827446	8.84179	-1.67481	0.112539	0.36891	-5.10987
P58802	-2.5398	12.1284	-1.67469	0.112563	0.36891	-5.11005
O35954	1.01858	15.2855	1.67435	0.11263	0.368927	-5.11054
Q6NVF4	2.67762	12.5062	1.67177	0.113144	0.370413	-5.11435
O35345	0.373206	16.7551	1.67085	0.113328	0.370814	-5.1157
Q6TYB5	-0.269212	10.409	-1.67047	0.113405	0.370865	-5.11627
Q9CZX8	0.64439	18.7297	1.66992	0.113515	0.370937	-5.11708
Q99LJ7	1.26973	15.4353	1.66922	0.113656	0.370937	-5.11812
Q3TDD9	-1.49048	17.6192	-1.6692	0.113659	0.370937	-5.11813
Q60710	0.504584	19.1784	1.6691	0.11368	0.370937	-5.11829
Q91VZ6	0.439436	17.1202	1.66863	0.113775	0.370937	-5.11899
Q9Z0S9	1.75118	15.0533	1.66853	0.113795	0.370937	-5.11913
Q9D6K7	2.72163	10.4376	1.6677	0.113962	0.371281	-5.12036
Q9R0M3	0.393177	10.2213	1.66573	0.114358	0.37237	-5.12325
P04627	0.502362	15.9129	1.66524	0.114457	0.372494	-5.12398
Q91YS8	0.414621	15.8048	1.66474	0.114558	0.372621	-5.12471
Q8CGA0	0.389676	16.8367	1.66383	0.114741	0.372924	-5.12604
Q8CG70	2.24751	11.8289	1.66353	0.114802	0.372924	-5.12648
P51174	0.451814	20.5992	1.66336	0.114836	0.372924	-5.12673
Q7TPV4	0.494551	15.1812	1.66294	0.114921	0.373001	-5.12735
P97287	1.6904	14.3889	1.66218	0.115075	0.373259	-5.12846
Q6AW46	-2.52014	12.5546	-1.66194	0.115124	0.373259	-5.12882
Q9WUB3	-0.371282	20.3489	-1.66097	0.11532	0.373351	-5.13024
O35660	2.52523	10.4934	1.6605	0.115416	0.373351	-5.13093
P29621	0.504393	16.4014	1.66	0.115518	0.373351	-5.13166
P09602	3.52682	11.2536	1.65983	0.115553	0.373351	-5.13192
O88569	-0.41094	20.6508	-1.6597	0.115579	0.373351	-5.13211
P30681	1.32078	16.4508	1.65964	0.11559	0.373351	-5.13219
P17710	0.413655	18.6059	1.65961	0.115598	0.373351	-5.13224
Q9CQC9	0.387944	19.8323	1.6589	0.115743	0.373351	-5.13329
Q9DB25	0.496537	17.0775	1.65882	0.115758	0.373351	-5.1334
P46938	1.54934	15.5673	1.65855	0.115813	0.373351	-5.13379
Q9D1L0	0.416048	17.0019	1.65846	0.115831	0.373351	-5.13392
Q03734	-0.672943	20.6785	-1.65717	0.116095	0.373932	-5.13582
Q91YE6	0.560196	16.1689	1.65677	0.116177	0.373932	-5.1364
Q9JJG0	0.423611	14.8975	1.65644	0.116245	0.373932	-5.13689
Q9DAV9	1.50671	14.6124	1.65637	0.116259	0.373932	-5.13699
Q921L3	0.495726	17.9273	1.65604	0.116325	0.373947	-5.13747
Q8C1A3	1.97101	13.4522	1.65428	0.116687	0.37491	-5.14005
Q61735	-0.712921	17.1524	-1.6535	0.116847	0.375226	-5.14119
Q9DCT8	0.365979	18.6232	1.65252	0.117049	0.375598	-5.14263
Q61576	0.828287	15.794	1.65228	0.117098	0.375598	-5.14298
P14148	0.761333	18.2086	1.65203	0.117149	0.375598	-5.14334
P14106	0.568869	17.7776	1.65157	0.117245	0.375705	-5.14402
P09813	0.899476	22.1197	1.65037	0.117491	0.375928	-5.14577
Q8K411	-0.333701	16.3042	-1.65037	0.117492	0.375928	-5.14577
P47199	-0.5845	16.8864	-1.65011	0.117545	0.375928	-5.14615
Q78PG9	1.66337	15.0708	1.65002	0.117563	0.375928	-5.14627
E9Q1P8	2.47254	12.6764	1.64952	0.117668	0.376065	-5.14702
P97315	-0.584437	17.276	-1.64724	0.118139	0.377013	-5.15034
Q9DBB9	0.534415	18.4594	1.64709	0.118171	0.377013	-5.15056
Q61792	0.411957	19.7582	1.647	0.118188	0.377013	-5.15069
A3KGS3	1.38193	13.9097	1.64671	0.118249	0.377013	-5.15111
Q6ZPJ3	0.569848	15.8157	1.64631	0.118331	0.377013	-5.15169
O89053	0.6714	19.6087	1.64628	0.118338	0.377013	-5.15174
Q8R3B1	-0.355845	18.387	-1.64559	0.118481	0.377269	-5.15274
Q91X79	2.245	12.9222	1.64499	0.118606	0.377309	-5.15362
P62307	2.35031	13.5533	1.64469	0.118669	0.377309	-5.15406
Q99K41	-1.64353	14.1902	-1.64463	0.118681	0.377309	-5.15414
Q8VDP3	0.715188	15.8658	1.64342	0.118934	0.377916	-5.15591
Q8BP40	-0.443204	16.6178	-1.64227	0.119174	0.378449	-5.15759
Q91YY4	2.08307	12.7802	1.64201	0.119227	0.378449	-5.15796
P31938	0.486111	17.6052	1.64157	0.11932	0.378544	-5.1586
Q9JM14	0.552938	16.7912	1.64053	0.119538	0.379039	-5.16012
Q8CH25	1.99184	14.0931	1.63909	0.119839	0.379795	-5.16221
Q3UPY5	0.378598	17.2688	1.63878	0.119906	0.379804	-5.16267
Q3TL44	-0.402688	15.6383	-1.63848	0.119968	0.379804	-5.1631
Q9JKC8	0.392617	18.03	1.638	0.120069	0.379896	-5.1638
Q9CQ52	1.71435	10.6572	1.63774	0.120122	0.379896	-5.16417
P62960	0.441915	17.8709	1.63599	0.120492	0.380867	-5.16672
P70271	0.55569	16.008	1.63544	0.120608	0.380914	-5.16752
Q6PFR5	1.84256	14.0466	1.63532	0.120633	0.380914	-5.16769
Q9CR76	1.78947	13.5143	1.63282	0.121163	0.382306	-5.17133
Q9D061	1.91551	13.7791	1.63242	0.121247	0.382306	-5.1719
P54731	0.331697	17.4657	1.63234	0.121264	0.382306	-5.17201
Q9D1H7	0.665621	16.2321	1.63074	0.121603	0.38315	-5.17433
Q8C0J6	1.19159	14.5508	1.63033	0.12169	0.38315	-5.17493
Q8R0W0	0.665427	16.942	1.63015	0.12173	0.38315	-5.17519
Q00915	-0.625826	16.1093	-1.62989	0.121785	0.38315	-5.17557
Q7TNG5	-0.399226	18.0663	-1.62948	0.121873	0.383227	-5.17617
Q9Z2Z9	0.587737	16.0064	1.62835	0.122113	0.383783	-5.1778
P03958	1.10487	15.3372	1.62736	0.122324	0.384173	-5.17923
Q60864	0.421324	19.3264	1.62717	0.122364	0.384173	-5.1795
P54728	0.343702	19.3889	1.62436	0.122966	0.385678	-5.18357
Q499X9	1.46611	13.7302	1.62434	0.122971	0.385678	-5.1836
Q7TMB8	0.461333	19.0039	1.62389	0.123067	0.385779	-5.18424
P56183	1.83888	11.113	1.62345	0.123161	0.385875	-5.18488
P17563	-0.321715	21.4127	-1.62256	0.123353	0.386131	-5.18617
Q9WTP6	0.54741	21.0494	1.62248	0.123371	0.386131	-5.18628
P70297	1.37953	14.2179	1.62169	0.123541	0.386166	-5.18742
Q8VC16	0.505734	13.6075	1.62137	0.123609	0.386166	-5.18788
Q03350	-1.74795	9.49303	-1.62116	0.123654	0.386166	-5.18818
Q8CHY3	0.44028	15.8121	1.62068	0.123759	0.386166	-5.18889
Q3V0T4	2.24049	10.3198	1.62035	0.123829	0.386166	-5.18935
Q8C156	0.310473	21.7302	1.62031	0.123839	0.386166	-5.18942
Q91VU7	1.02528	14.897	1.62024	0.123853	0.386166	-5.18951
Q9ES18	1.52252	11.1086	1.62006	0.123892	0.386166	-5.18977
Q9Z2M6	2.52226	13.3096	1.61831	0.124271	0.387147	-5.1923
Q0VBL3	1.80324	12.0969	1.61741	0.124465	0.387552	-5.19359
Q99MV1	0.51769	18.5366	1.61622	0.124724	0.388159	-5.19531
B7ZMP1	0.515014	16.3284	1.61575	0.124826	0.388275	-5.19598
Q8VBZ0	0.503003	15.4356	1.61522	0.12494	0.388432	-5.19674
Q9CQ56	0.367222	16.2323	1.61483	0.125027	0.388501	-5.19731
Q7TSJ2	2.4293	13.5884	1.61416	0.125171	0.388669	-5.19827
Q8BHF7	1.01682	15.2811	1.61399	0.125209	0.388669	-5.19852
Q64729	1.89319	10.8507	1.61288	0.125452	0.389084	-5.20012
Q99LD9	-1.28677	14.9012	-1.61278	0.125474	0.389084	-5.20026
Q8K003	1.59192	10.3343	1.61238	0.12556	0.389084	-5.20083
A2ATU0	-2.68623	18.2843	-1.6122	0.1256	0.389084	-5.20109
Q8R2Y3	0.413264	15.5657	1.61081	0.125903	0.389473	-5.20308
Q9D6J6	-0.358665	17.9996	-1.6104	0.125993	0.389473	-5.20367
Q8CHT0	-0.39953	19.193	-1.61029	0.126018	0.389473	-5.20384
Q6NVF9	1.07567	15.1159	1.61026	0.126025	0.389473	-5.20388
Q8JZV9	-1.75643	8.34939	-1.60972	0.126144	0.389473	-5.20466
P15327	0.601535	18.8847	1.60939	0.126215	0.389473	-5.20513
Q9QZS0	-1.40081	12.3022	-1.60937	0.12622	0.389473	-5.20516
P60840	2.46111	11.1698	1.60899	0.126303	0.389473	-5.2057
P97321	1.97888	11.0703	1.60867	0.126373	0.389473	-5.20616
P58404	0.511934	15.4497	1.60842	0.126427	0.389473	-5.20651
Q8VEA4	-1.77044	14.914	-1.60814	0.126489	0.389473	-5.20692
Q9D7E3	1.63179	12.0906	1.6081	0.126498	0.389473	-5.20698
Q60936	-1.12808	14.4126	-1.60726	0.126682	0.389672	-5.20817
P97328	-1.95307	12.9657	-1.60722	0.126692	0.389672	-5.20824
Q60931	-0.332781	19.5879	-1.60607	0.126946	0.390136	-5.20989
Q9CQF9	0.4062	18.911	1.60595	0.126971	0.390136	-5.21006
Q8BNU0	2.56523	12.1127	1.60492	0.1272	0.390638	-5.21154
Q99LG4	1.53604	13.6514	1.6044	0.127314	0.390791	-5.21228
Q9R1P3	0.501958	19.1932	1.60409	0.127382	0.390803	-5.21272
Q8BGP6	0.447134	14.7547	1.60338	0.127538	0.391084	-5.21373
Q3UMC0	-1.13058	14.2907	-1.60055	0.128167	0.392811	-5.21778
Q8R0P4	-0.3705	16.5869	-1.60013	0.128261	0.3929	-5.21839
Q80U16	0.581698	22.4726	1.59884	0.128548	0.393581	-5.22023
Q8BIK4	0.337054	16.1523	1.59803	0.128729	0.393936	-5.22139
Q8K0Z7	-0.796196	15.0223	-1.59737	0.128876	0.393999	-5.22233
Q91YJ2	0.487313	16.8039	1.59735	0.12888	0.393999	-5.22236
P17427	0.339338	19.6732	1.59658	0.129052	0.394171	-5.22345
Q9Z2B9	0.694428	14.844	1.59576	0.129236	0.394171	-5.22463
Q6S5J6	2.02187	13.2119	1.59569	0.12925	0.394171	-5.22472
P60824	-2.0076	12.2461	-1.59561	0.12927	0.394171	-5.22485
Q8VBW6	0.397874	16.4461	1.59498	0.12941	0.394171	-5.22574
Q9D9K3	1.16515	15.0935	1.59466	0.129483	0.394171	-5.2262
P11688	0.517271	16.8653	1.59438	0.129544	0.394171	-5.22659
Q3U1T9	2.09301	13.2227	1.59432	0.129558	0.394171	-5.22668
Q60605	0.457741	20.9968	1.59371	0.129694	0.394171	-5.22754
Q8VCI5	0.414736	16.8929	1.59344	0.129756	0.394171	-5.22794
Q61189	-3.06229	12.9714	-1.59331	0.129785	0.394171	-5.22812
Q9Z224	0.996135	16.8438	1.59328	0.129793	0.394171	-5.22817
Q6A068	0.39384	15.6265	1.59295	0.129867	0.394171	-5.22864
B2RWS6	1.39259	12.8803	1.59284	0.129892	0.394171	-5.22879
Q99PP7	1.67178	10.6821	1.59238	0.129994	0.394171	-5.22944
Q8K2Q9	0.907172	15.0092	1.59191	0.1301	0.394171	-5.23012
Q9D906	0.439163	16.6219	1.59166	0.130157	0.394171	-5.23047
Q91W78	1.50018	9.9587	1.59156	0.130178	0.394171	-5.23061
Q9JI11	1.69914	13.442	1.59132	0.130233	0.394171	-5.23095
Q9CVD2	1.84406	14.679	1.59129	0.130239	0.394171	-5.23099
[truncated: 4,051 more rows]
