# Supplementary material for: SMYD3: a new regulator of adipocyte precursor proliferation at the early steps of differentiation
Source: Int J Obes (Lond). 2023 Dec 26;48(4):557–66. doi: 10.1038/s41366-023-01450-x (PMC10978492; doi:10.1038/s41366-023-01450-x)
Supplement: Supplementary file 3 — Supplementary Table 3 [file 41366_2023_1450_MOESM3_ESM.xlsx]

## Sheet: Visceral Hi-INFL gseGO_p.0.05
	ID	Description	GeneRatio	BgRatio	pvalue	p.adjust	qvalue	geneID	Count
GO:0006084	GO:0006084	acetyl-CoA metabolic process	8/496	33/23210	3.56826e-07	0.000849909	0.000701825	Acacb/Pdk4/Fasn/Acaca/Hmgcs1/Acly/Mvd/Pdk2	8
GO:0018126	GO:0018126	protein hydroxylation	7/496	25/23210	6.71855e-07	0.000849909	0.000701825	Vps33b/P3h1/P4ha1/Crtap/Plod2/Plod3/Plod1	7
GO:0009112	GO:0009112	nucleobase metabolic process	8/496	37/23210	9.20479e-07	0.000849909	0.000701825	Hprt/Ctps/Kdm1a/Dpyd/Prps1/Cmpk1/Aldh6a1/Gda	8
GO:0071801	GO:0071801	regulation of podosome assembly	6/496	18/23210	1.37911e-06	0.000955035	0.000788634	Arhgef2/Lcp1/Fscn1/Arpc2/Palld/Asap1	6
GO:0071364	GO:0071364	cellular response to epidermal growth factor stimulus	8/496	41/23210	2.11342e-06	0.00117084	0.000966836	Cfl1/Ptpn12/Plcg1/Vil1/Ireb2/Arpc2/Dusp3/Iqgap1	8
GO:0070849	GO:0070849	response to epidermal growth factor	8/496	44/23210	3.70594e-06	0.00171091	0.00141281	Cfl1/Ptpn12/Plcg1/Vil1/Ireb2/Arpc2/Dusp3/Iqgap1	8
GO:0071800	GO:0071800	podosome assembly	6/496	22/23210	5.15424e-06	0.00191954	0.00158509	Arhgef2/Lcp1/Fscn1/Arpc2/Palld/Asap1	6
GO:0071803	GO:0071803	positive regulation of podosome assembly	5/496	14/23210	7.45592e-06	0.00191954	0.00158509	Lcp1/Fscn1/Arpc2/Palld/Asap1	5
GO:0036230	GO:0036230	granulocyte activation	7/496	35/23210	7.81136e-06	0.00191954	0.00158509	Itgam/Itgb2/Fcer1g/Myo1f/Pi4k2a/Abr/Cd300a	7
GO:0046461	GO:0046461	neutral lipid catabolic process	7/496	35/23210	7.81136e-06	0.00191954	0.00158509	Apoa4/Ldlr/Apoc2/Pnpla2/Ces1d/Daglb/Abhd12	7
GO:0046464	GO:0046464	acylglycerol catabolic process	7/496	35/23210	7.81136e-06	0.00191954	0.00158509	Apoa4/Ldlr/Apoc2/Pnpla2/Ces1d/Daglb/Abhd12	7
GO:0046098	GO:0046098	guanine metabolic process	3/496	3/23210	9.70163e-06	0.00191954	0.00158509	Hprt/Kdm1a/Gda	3
GO:0046946	GO:0046946	hydroxylysine metabolic process	3/496	3/23210	9.70163e-06	0.00191954	0.00158509	Plod2/Plod3/Plod1	3
GO:0046947	GO:0046947	hydroxylysine biosynthetic process	3/496	3/23210	9.70163e-06	0.00191954	0.00158509	Plod2/Plod3/Plod1	3
GO:0017185	GO:0017185	peptidyl-lysine hydroxylation	4/496	8/23210	1.34736e-05	0.00215629	0.00178059	Vps33b/Plod2/Plod3/Plod1	4
GO:1900262	GO:1900262	regulation of DNA-directed DNA polymerase activity	4/496	8/23210	1.34736e-05	0.00215629	0.00178059	Rfc3/Rfc4/Rfc5/Rfc2	4
GO:1900264	GO:1900264	positive regulation of DNA-directed DNA polymerase activity	4/496	8/23210	1.34736e-05	0.00215629	0.00178059	Rfc3/Rfc4/Rfc5/Rfc2	4
GO:0050858	GO:0050858	negative regulation of antigen receptor-mediated signaling pathway	6/496	26/23210	1.47904e-05	0.00215629	0.00178059	Lgals3/Ptpn6/Ptprj/Cd300a/Lpxn/Dusp3	6
GO:0090208	GO:0090208	positive regulation of triglyceride metabolic process	6/496	26/23210	1.47904e-05	0.00215629	0.00178059	Apoa4/Ldlr/Apoc2/Gpam/Pnpla2/Acsl5	6
GO:0002283	GO:0002283	neutrophil activation involved in immune response	5/496	16/23210	1.57014e-05	0.00217465	0.00179575	Itgam/Itgb2/Fcer1g/Myo1f/Abr	5
GO:0045730	GO:0045730	respiratory burst	6/496	27/23210	1.86746e-05	0.00246326	0.00203408	Ncf2/Mpo/Ncf4/Ncf1/Cyba/Lbp	6
GO:0010898	GO:0010898	positive regulation of triglyceride catabolic process	4/496	9/23210	2.38423e-05	0.00300196	0.00247891	Apoa4/Ldlr/Apoc2/Pnpla2	4
GO:1902743	GO:1902743	regulation of lamellipodium organization	7/496	42/23210	2.75414e-05	0.00331694	0.00273901	Cd44/Cfl1/Capzb/Fscn1/Vil1/Arpc2/Coro1c	7
GO:0042119	GO:0042119	neutrophil activation	6/496	29/23210	2.89011e-05	0.00333567	0.00275448	Itgam/Itgb2/Fcer1g/Myo1f/Abr/Cd300a	6
GO:0006890	GO:0006890	retrograde vesicle-mediated transport, Golgi to ER	7/496	43/23210	3.22959e-05	0.00357839	0.0029549	Cope/Copz1/Uvrag/Stx18/Kdelr1/Arfgap3/Lman2	7
GO:1902563	GO:1902563	regulation of neutrophil activation	4/496	10/23210	3.90655e-05	0.00406664	0.00335809	Itgam/Itgb2/Abr/Cd300a	4
GO:0060099	GO:0060099	regulation of phagocytosis, engulfment	5/496	19/23210	3.96388e-05	0.00406664	0.00335809	Lbp/Cd300a/Nckap1l/Trem2/Stap1	5
GO:1903393	GO:1903393	positive regulation of adherens junction organization	6/496	31/23210	4.32033e-05	0.00418705	0.00345752	Cfl1/Map4k4/Ptprj/Iqsec1/Dusp3/Iqgap1	6
GO:0090207	GO:0090207	regulation of triglyceride metabolic process	7/496	45/23210	4.38356e-05	0.00418705	0.00345752	Apoa4/Ldlr/Apoc2/Gpam/Thrsp/Pnpla2/Acsl5	7
GO:0006695	GO:0006695	cholesterol biosynthetic process	7/496	46/23210	5.07602e-05	0.00449486	0.00371169	Hsd17b7/Apoa4/Lss/Hmgcs1/Dhcr24/Ces1d/Mvd	7
GO:0050798	GO:0050798	activated T cell proliferation	7/496	46/23210	5.07602e-05	0.00449486	0.00371169	Itgam/Itgb2/Casp3/Itgad/Gpam/Pycard/Ripk3	7
GO:1905153	GO:1905153	regulation of membrane invagination	5/496	20/23210	5.19261e-05	0.00449486	0.00371169	Lbp/Cd300a/Nckap1l/Trem2/Stap1	5
GO:1902653	GO:1902653	secondary alcohol biosynthetic process	7/496	47/23210	5.85554e-05	0.0049151	0.00405872	Hsd17b7/Apoa4/Lss/Hmgcs1/Dhcr24/Ces1d/Mvd	7
GO:0051014	GO:0051014	actin filament severing	4/496	11/23210	6.03517e-05	0.00491689	0.00406019	Vil1/Gmfb/Gmfg/Flii	4
GO:0051016	GO:0051016	barbed-end actin filament capping	5/496	21/23210	6.69602e-05	0.00503861	0.0041607	Cfl1/Capzb/Evl/Vil1/Arpc2	5
GO:0008089	GO:0008089	anterograde axonal transport	7/496	48/23210	6.73027e-05	0.00503861	0.0041607	Kif3a/Fmr1/Bloc1s5/Ap3m2/Arl8b/Ap3s1/Map1a	7
GO:0050873	GO:0050873	brown fat cell differentiation	7/496	48/23210	6.73027e-05	0.00503861	0.0041607	Slc2a4/Selenbp1/Adrb3/Lep/Ero1l/Aldh6a1/Plac8	7
GO:0006739	GO:0006739	NADP metabolic process	6/496	34/23210	7.47469e-05	0.00530894	0.00438394	Ncf2/Hsd11b1/Fmo1/Kcnab2/Ncf1/Tigar	6
GO:0044275	GO:0044275	cellular carbohydrate catabolic process	6/496	34/23210	7.47469e-05	0.00530894	0.00438394	Gusb/Hsd11b1/Tigar/Pygb/Pygl/Pygm	6
GO:0043300	GO:0043300	regulation of leukocyte degranulation	7/496	49/23210	7.70885e-05	0.00533838	0.00440825	Itgam/Itgb2/Hmox1/Fes/Fcer1g/Abr/Cd300a	7
GO:0033866	GO:0033866	nucleoside bisphosphate biosynthetic process	6/496	35/23210	8.85956e-05	0.00560292	0.0046267	Acacb/Pdk4/Dcakd/Acsl5/Acly/Pdk2	6
GO:0034030	GO:0034030	ribonucleoside bisphosphate biosynthetic process	6/496	35/23210	8.85956e-05	0.00560292	0.0046267	Acacb/Pdk4/Dcakd/Acsl5/Acly/Pdk2	6
GO:0034033	GO:0034033	purine nucleoside bisphosphate biosynthetic process	6/496	35/23210	8.85956e-05	0.00560292	0.0046267	Acacb/Pdk4/Dcakd/Acsl5/Acly/Pdk2	6
GO:0043312	GO:0043312	neutrophil degranulation	4/496	12/23210	8.89995e-05	0.00560292	0.0046267	Itgam/Itgb2/Myo1f/Abr	4
GO:0006144	GO:0006144	purine nucleobase metabolic process	5/496	23/23210	0.000106886	0.00657941	0.00543305	Hprt/Kdm1a/Dpyd/Prps1/Gda	5
GO:0038094	GO:0038094	Fc-gamma receptor signaling pathway	4/496	13/23210	0.000126387	0.00761067	0.00628462	Ptprc/Fcer1g/Myo1g/Ptprj	4
GO:0046460	GO:0046460	neutral lipid biosynthetic process	6/496	38/23210	0.000142736	0.00823705	0.00680186	Ldlr/Gpam/Thrsp/Acsl5/Mogat1/Pck1	6
GO:0046463	GO:0046463	acylglycerol biosynthetic process	6/496	38/23210	0.000142736	0.00823705	0.00680186	Ldlr/Gpam/Thrsp/Acsl5/Mogat1/Pck1	6
GO:0001516	GO:0001516	prostaglandin biosynthetic process	5/496	25/23210	0.000162921	0.00835725	0.00690112	Anxa1/Tbxas1/Fabp5/Prxl2b/Hpgds	5
GO:0035384	GO:0035384	thioester biosynthetic process	5/496	25/23210	0.000162921	0.00835725	0.00690112	Acacb/Pdk4/Acsl5/Acly/Pdk2	5
GO:0046457	GO:0046457	prostanoid biosynthetic process	5/496	25/23210	0.000162921	0.00835725	0.00690112	Anxa1/Tbxas1/Fabp5/Prxl2b/Hpgds	5
GO:0055094	GO:0055094	response to lipoprotein particle	5/496	25/23210	0.000162921	0.00835725	0.00690112	Itgb2/Fcer1g/Cd68/Ldlr/Hmgcs1	5
GO:0071616	GO:0071616	acyl-CoA biosynthetic process	5/496	25/23210	0.000162921	0.00835725	0.00690112	Acacb/Pdk4/Acsl5/Acly/Pdk2	5
GO:1901658	GO:1901658	glycosyl compound catabolic process	5/496	25/23210	0.000162921	0.00835725	0.00690112	Hprt/Gusb/Gla/Upp1/Dpyd	5
GO:0010896	GO:0010896	regulation of triglyceride catabolic process	4/496	14/23210	0.000173959	0.0087612	0.00723469	Apoa4/Ldlr/Apoc2/Pnpla2	4
GO:0019626	GO:0019626	short-chain fatty acid catabolic process	3/496	6/23210	0.000184915	0.00914666	0.00755299	Ces1d/Ces1f/Pck1	3
GO:0046456	GO:0046456	icosanoid biosynthetic process	6/496	40/23210	0.000191422	0.00930242	0.00768161	Anxa1/Tbxas1/Fabp5/Ltc4s/Prxl2b/Hpgds	6
GO:0006891	GO:0006891	intra-Golgi vesicle-mediated transport	5/496	26/23210	0.00019819	0.0094653	0.00781611	Cope/Copz1/Copb1/Golga5/Copg1	5
GO:0033628	GO:0033628	regulation of cell adhesion mediated by integrin	6/496	41/23210	0.000220229	0.0100006	0.00825811	Serpine1/Ptpn6/Fermt3/Nckap1l/Lpxn/Podxl	6
GO:0042304	GO:0042304	regulation of fatty acid biosynthetic process	6/496	41/23210	0.000220229	0.0100006	0.00825811	Pdk4/Apoa4/Anxa1/Apoc2/Fabp5/Lpgat1	6
GO:0050856	GO:0050856	regulation of T cell receptor signaling pathway	6/496	41/23210	0.000220229	0.0100006	0.00825811	Lgals3/Ptpn6/Rela/Ptprj/Cd300a/Dusp3	6
GO:0006206	GO:0006206	pyrimidine nucleobase metabolic process	4/496	15/23210	0.000233221	0.0100303	0.00828268	Ctps/Dpyd/Cmpk1/Aldh6a1	4
GO:0032530	GO:0032530	regulation of microvillus organization	4/496	15/23210	0.000233221	0.0100303	0.00828268	Fscn1/Vil1/Podxl/Pld1	4
GO:0071404	GO:0071404	cellular response to low-density lipoprotein particle stimulus	4/496	15/23210	0.000233221	0.0100303	0.00828268	Itgb2/Fcer1g/Ldlr/Hmgcs1	4
GO:0050996	GO:0050996	positive regulation of lipid catabolic process	5/496	27/23210	0.000238989	0.0100303	0.00828268	Apoa4/Ldlr/Apoc2/Pnpla2/Acsl5	5
GO:0071402	GO:0071402	cellular response to lipoprotein particle stimulus	5/496	27/23210	0.000238989	0.0100303	0.00828268	Itgb2/Fcer1g/Cd68/Ldlr/Hmgcs1	5
GO:0010883	GO:0010883	regulation of lipid storage	6/496	42/23210	0.000252344	0.0104327	0.00861497	Acacb/Lep/Mest/Apoc4/Pnpla2/Tmem135	6
GO:0009395	GO:0009395	phospholipid catabolic process	6/496	43/23210	0.000288027	0.0117329	0.00968859	Ldlr/Apoc2/Plcg1/Pla2g15/Abhd12/Pld1	6
GO:0002431	GO:0002431	Fc receptor mediated stimulatory signaling pathway	4/496	16/23210	0.000305728	0.011762	0.00971266	Ptprc/Fcer1g/Myo1g/Ptprj	4
GO:0046112	GO:0046112	nucleobase biosynthetic process	4/496	16/23210	0.000305728	0.011762	0.00971266	Hprt/Ctps/Prps1/Cmpk1	4
GO:0060100	GO:0060100	positive regulation of phagocytosis, engulfment	4/496	16/23210	0.000305728	0.011762	0.00971266	Lbp/Nckap1l/Trem2/Stap1	4
GO:1905155	GO:1905155	positive regulation of membrane invagination	4/496	16/23210	0.000305728	0.011762	0.00971266	Lbp/Nckap1l/Trem2/Stap1	4
GO:0002583	GO:0002583	regulation of antigen processing and presentation of peptide antigen	3/496	7/23210	0.000318461	0.0120841	0.00997859	Hfe/Trem2/Pycard	3
GO:0001820	GO:0001820	serotonin secretion	4/496	17/23210	0.000393073	0.0141404	0.0116767	Lgals3/Fcer1g/Cd300a/Maob	4
GO:0006614	GO:0006614	SRP-dependent cotranslational protein targeting to membrane	4/496	17/23210	0.000393073	0.0141404	0.0116767	Srp14/Srp9/Srp68/Sec63	4
GO:0035729	GO:0035729	cellular response to hepatocyte growth factor stimulus	4/496	17/23210	0.000393073	0.0141404	0.0116767	Lgmn/Rela/Vil1/Gsk3b	4
GO:0050855	GO:0050855	regulation of B cell receptor signaling pathway	4/496	17/23210	0.000393073	0.0141404	0.0116767	Prkch/Cd300a/Lpxn/Stap1	4
GO:1902745	GO:1902745	positive regulation of lamellipodium organization	5/496	30/23210	0.00040019	0.0142119	0.0117357	Cfl1/Fscn1/Vil1/Arpc2/Coro1c	5
GO:0045010	GO:0045010	actin nucleation	6/496	46/23210	0.000419266	0.0147009	0.0121394	Coro1a/Evl/Vil1/Gmfb/Arpc2/Gmfg	6
GO:0045920	GO:0045920	negative regulation of exocytosis	5/496	31/23210	0.000468841	0.0162336	0.0134052	Anxa1/Hmox1/Fmr1/Abr/Cd300a	5
GO:0006613	GO:0006613	cotranslational protein targeting to membrane	4/496	18/23210	0.000496886	0.0163415	0.0134942	Srp14/Srp9/Srp68/Sec63	4
GO:0038093	GO:0038093	Fc receptor signaling pathway	4/496	18/23210	0.000496886	0.0163415	0.0134942	Ptprc/Fcer1g/Myo1g/Ptprj	4
GO:0032534	GO:0032534	regulation of microvillus assembly	3/496	8/23210	0.000501453	0.0163415	0.0134942	Fscn1/Podxl/Pld1	3
GO:0043313	GO:0043313	regulation of neutrophil degranulation	3/496	8/23210	0.000501453	0.0163415	0.0134942	Itgam/Itgb2/Abr	3
GO:0051126	GO:0051126	negative regulation of actin nucleation	3/496	8/23210	0.000501453	0.0163415	0.0134942	Coro1a/Gmfb/Gmfg	3
GO:0002446	GO:0002446	neutrophil mediated immunity	5/496	32/23210	0.000545994	0.0175861	0.014522	Itgam/Itgb2/Myo1f/Ncf1/Abr	5
GO:0017001	GO:0017001	antibiotic catabolic process	6/496	49/23210	0.000593054	0.0188823	0.0155923	Adh1/Apoa4/Mpo/Akr1b8/Hp/Pck1	6
GO:0035728	GO:0035728	response to hepatocyte growth factor	4/496	19/23210	0.000618819	0.0192469	0.0158934	Lgmn/Rela/Vil1/Gsk3b	4
GO:0050860	GO:0050860	negative regulation of T cell receptor signaling pathway	4/496	19/23210	0.000618819	0.0192469	0.0158934	Lgals3/Ptpn6/Ptprj/Dusp3	4
GO:0045047	GO:0045047	protein targeting to ER	5/496	33/23210	0.0006323	0.0192469	0.0158934	Srp14/Srp9/Srp68/Sec63/Macf1	5
GO:0071827	GO:0071827	plasma lipoprotein particle organization	5/496	33/23210	0.0006323	0.0192469	0.0158934	Apoa4/Mpo/Pltp/Soat1/Ces1d	5
GO:0002433	GO:0002433	immune response-regulating cell surface receptor signaling pathway involved in phagocytosis	3/496	9/23210	0.000740259	0.021067	0.0173964	Ptprc/Myo1g/Ptprj	3
GO:0002887	GO:0002887	negative regulation of myeloid leukocyte mediated immunity	3/496	9/23210	0.000740259	0.021067	0.0173964	Hmox1/Abr/Cd300a	3
GO:0030223	GO:0030223	neutrophil differentiation	3/496	9/23210	0.000740259	0.021067	0.0173964	Fasn/Dhrs7b/Inpp5d	3
GO:0038096	GO:0038096	Fc-gamma receptor signaling pathway involved in phagocytosis	3/496	9/23210	0.000740259	0.021067	0.0173964	Ptprc/Myo1g/Ptprj	3
GO:0046113	GO:0046113	nucleobase catabolic process	3/496	9/23210	0.000740259	0.021067	0.0173964	Dpyd/Aldh6a1/Gda	3
GO:2000392	GO:2000392	regulation of lamellipodium morphogenesis	3/496	9/23210	0.000740259	0.021067	0.0173964	Cd44/Vil1/Coro1c	3
GO:0002523	GO:0002523	leukocyte migration involved in inflammatory response	4/496	20/23210	0.000760542	0.021067	0.0173964	Aoc3/Itgam/Itgb2/Lbp	4
GO:0002577	GO:0002577	regulation of antigen processing and presentation	4/496	20/23210	0.000760542	0.021067	0.0173964	Cd68/Hfe/Trem2/Pycard	4
GO:0048261	GO:0048261	negative regulation of receptor-mediated endocytosis	4/496	20/23210	0.000760542	0.021067	0.0173964	Sdcbp/Fmr1/Apoc2/Ubqln2	4
GO:0019432	GO:0019432	triglyceride biosynthetic process	5/496	35/23210	0.000835068	0.0226778	0.0187266	Ldlr/Gpam/Thrsp/Acsl5/Pck1	5
GO:2000249	GO:2000249	regulation of actin cytoskeleton reorganization	5/496	35/23210	0.000835068	0.0226778	0.0187266	Fes/Arhgdia/Arpc2/Gmfg/Stap1	5
GO:0010866	GO:0010866	regulation of triglyceride biosynthetic process	4/496	21/23210	0.000923738	0.0246034	0.0203166	Ldlr/Gpam/Thrsp/Acsl5	4
GO:0034367	GO:0034367	protein-containing complex remodeling	4/496	21/23210	0.000923738	0.0246034	0.0203166	Apoa4/Mpo/Pltp/Gtf2e1	4
GO:0030574	GO:0030574	collagen catabolic process	5/496	36/23210	0.000952916	0.0251388	0.0207588	Ctss/Ctsb/Mmp12/Fap/Mrc2	5
GO:0014062	GO:0014062	regulation of serotonin secretion	3/496	10/23210	0.00104077	0.0263074	0.0217237	Lgals3/Cd300a/Maob	3
GO:0043301	GO:0043301	negative regulation of leukocyte degranulation	3/496	10/23210	0.00104077	0.0263074	0.0217237	Hmox1/Abr/Cd300a	3
GO:0070391	GO:0070391	response to lipoteichoic acid	3/496	10/23210	0.00104077	0.0263074	0.0217237	Rela/Lbp/Trem2	3
GO:0071223	GO:0071223	cellular response to lipoteichoic acid	3/496	10/23210	0.00104077	0.0263074	0.0217237	Rela/Lbp/Trem2	3
GO:0042554	GO:0042554	superoxide anion generation	5/496	37/23210	0.00108269	0.0263074	0.0217237	Ncf2/Itgam/Itgb2/Ncf1/Cyba	5
GO:0050892	GO:0050892	intestinal absorption	5/496	37/23210	0.00108269	0.0263074	0.0217237	Apoa4/Ldlr/Lep/Vil1/Ireb2	5
GO:0051693	GO:0051693	actin filament capping	5/496	37/23210	0.00108269	0.0263074	0.0217237	Cfl1/Capzb/Evl/Vil1/Arpc2	5
GO:0071825	GO:0071825	protein-lipid complex subunit organization	5/496	37/23210	0.00108269	0.0263074	0.0217237	Apoa4/Mpo/Pltp/Soat1/Ces1d	5
GO:0072599	GO:0072599	establishment of protein localization to endoplasmic reticulum	5/496	37/23210	0.00108269	0.0263074	0.0217237	Srp14/Srp9/Srp68/Sec63/Macf1	5
GO:0009067	GO:0009067	aspartate family amino acid biosynthetic process	4/496	22/23210	0.00111009	0.0265083	0.0218896	Asns/Plod2/Plod3/Plod1	4
GO:0050857	GO:0050857	positive regulation of antigen receptor-mediated signaling pathway	4/496	22/23210	0.00111009	0.0265083	0.0218896	Ptprc/Prkch/Rela/Stap1	4
GO:0006636	GO:0006636	unsaturated fatty acid biosynthetic process	5/496	38/23210	0.0012251	0.0287588	0.023748	Anxa1/Tbxas1/Fabp5/Prxl2b/Hpgds	5
GO:0030851	GO:0030851	granulocyte differentiation	5/496	38/23210	0.0012251	0.0287588	0.023748	Fasn/Hcls1/Kdm1a/Dhrs7b/Inpp5d	5
GO:0006837	GO:0006837	serotonin transport	4/496	23/23210	0.00132129	0.0289441	0.023901	Lgals3/Fcer1g/Cd300a/Maob	4
GO:0043687	GO:0043687	post-translational protein modification	4/496	23/23210	0.00132129	0.0289441	0.023901	P3h1/Sumf1/Atg12/Crtap	4
GO:1903306	GO:1903306	negative regulation of regulated secretory pathway	4/496	23/23210	0.00132129	0.0289441	0.023901	Hmox1/Fmr1/Abr/Cd300a	4
GO:0002585	GO:0002585	positive regulation of antigen processing and presentation of peptide antigen	2/496	3/23210	0.00134794	0.0289441	0.023901	Trem2/Pycard	2
GO:0006208	GO:0006208	pyrimidine nucleobase catabolic process	2/496	3/23210	0.00134794	0.0289441	0.023901	Dpyd/Aldh6a1	2
GO:0006210	GO:0006210	thymine catabolic process	2/496	3/23210	0.00134794	0.0289441	0.023901	Dpyd/Aldh6a1	2
GO:0019859	GO:0019859	thymine metabolic process	2/496	3/23210	0.00134794	0.0289441	0.023901	Dpyd/Aldh6a1	2
GO:0043456	GO:0043456	regulation of pentose-phosphate shunt	2/496	3/23210	0.00134794	0.0289441	0.023901	Hsd11b1/Tigar	2
GO:0046101	GO:0046101	hypoxanthine biosynthetic process	2/496	3/23210	0.00134794	0.0289441	0.023901	Hprt/Prps1	2
GO:1901873	GO:1901873	regulation of post-translational protein modification	2/496	3/23210	0.00134794	0.0289441	0.023901	P3h1/Crtap	2
GO:1901874	GO:1901874	negative regulation of post-translational protein modification	2/496	3/23210	0.00134794	0.0289441	0.023901	P3h1/Crtap	2
GO:0002679	GO:0002679	respiratory burst involved in defense response	3/496	11/23210	0.00140843	0.0297812	0.0245923	Mpo/Ncf1/Lbp	3
GO:0006072	GO:0006072	glycerol-3-phosphate metabolic process	3/496	11/23210	0.00140843	0.0297812	0.0245923	Gpam/Gpd2/Slc37a2	3
GO:0006692	GO:0006692	prostanoid metabolic process	5/496	40/23210	0.00155083	0.0312934	0.025841	Anxa1/Tbxas1/Fabp5/Prxl2b/Hpgds	5
GO:0006693	GO:0006693	prostaglandin metabolic process	5/496	40/23210	0.00155083	0.0312934	0.025841	Anxa1/Tbxas1/Fabp5/Prxl2b/Hpgds	5
GO:0042398	GO:0042398	cellular modified amino acid biosynthetic process	5/496	40/23210	0.00155083	0.0312934	0.025841	Chdh/Gatm/Plod2/Plod3/Plod1	5
GO:0072523	GO:0072523	purine-containing compound catabolic process	5/496	40/23210	0.00155083	0.0312934	0.025841	Hprt/Nt5e/Dpyd/Pde2a/Gda	5
GO:0032878	GO:0032878	regulation of establishment or maintenance of cell polarity	4/496	24/23210	0.00155902	0.0312934	0.025841	Cfl1/Kif3a/Dock8/Rufy3	4
GO:0045723	GO:0045723	positive regulation of fatty acid biosynthetic process	4/496	24/23210	0.00155902	0.0312934	0.025841	Apoa4/Anxa1/Apoc2/Lpgat1	4
GO:0046685	GO:0046685	response to arsenic-containing substance	4/496	24/23210	0.00155902	0.0312934	0.025841	Gsto1/Alad/Hmox1/Ddx3x	4
GO:0009066	GO:0009066	aspartate family amino acid metabolic process	5/496	41/23210	0.00173563	0.0345878	0.0285614	Adssl1/Asns/Plod2/Plod3/Plod1	5
GO:0031639	GO:0031639	plasminogen activation	4/496	25/23210	0.00182495	0.0353504	0.0291911	Serpine1/Klkb1/Dhcr24/Ctsz	4
GO:0051894	GO:0051894	positive regulation of focal adhesion assembly	4/496	25/23210	0.00182495	0.0353504	0.0291911	Cfl1/Map4k4/Ptprj/Iqgap1	4
GO:0120033	GO:0120033	negative regulation of plasma membrane bounded cell projection assembly	4/496	25/23210	0.00182495	0.0353504	0.0291911	Cfl1/Capzb/Evl/Stap1	4
GO:1902230	GO:1902230	negative regulation of intrinsic apoptotic signaling pathway in response to DNA damage	4/496	25/23210	0.00182495	0.0353504	0.0291911	Cd44/Ackr3/Kdm1a/Usp47	4
GO:0071281	GO:0071281	cellular response to iron ion	3/496	12/23210	0.00184824	0.0355529	0.0293583	Hmox1/Hfe/Ireb2	3
GO:0030835	GO:0030835	negative regulation of actin filament depolymerization	5/496	42/23210	0.00193608	0.0367324	0.0303323	Cfl1/Capzb/Evl/Vil1/Arpc2	5
GO:0045923	GO:0045923	positive regulation of fatty acid metabolic process	5/496	42/23210	0.00193608	0.0367324	0.0303323	Apoa4/Anxa1/Apoc2/Acsl5/Lpgat1	5
GO:0006213	GO:0006213	pyrimidine nucleoside metabolic process	4/496	26/23210	0.00212072	0.0391626	0.0323391	Upp1/Ctps/Dpyd/Cmpk1	4
GO:0019433	GO:0019433	triglyceride catabolic process	4/496	26/23210	0.00212072	0.0391626	0.0323391	Apoa4/Ldlr/Apoc2/Pnpla2	4
GO:0032528	GO:0032528	microvillus organization	4/496	26/23210	0.00212072	0.0391626	0.0323391	Fscn1/Vil1/Podxl/Pld1	4
GO:0051125	GO:0051125	regulation of actin nucleation	4/496	26/23210	0.00212072	0.0391626	0.0323391	Coro1a/Vil1/Gmfb/Gmfg	4
GO:0070232	GO:0070232	regulation of T cell apoptotic process	5/496	43/23210	0.00215293	0.0394941	0.0326128	Lgals3/Vhl/Gpam/Dock8/Ripk3	5
GO:0002091	GO:0002091	negative regulation of receptor internalization	3/496	13/23210	0.00236479	0.041592	0.0343452	Sdcbp/Fmr1/Ubqln2	3
GO:0030299	GO:0030299	intestinal cholesterol absorption	3/496	13/23210	0.00236479	0.041592	0.0343452	Apoa4/Ldlr/Lep	3
GO:0032494	GO:0032494	response to peptidoglycan	3/496	13/23210	0.00236479	0.041592	0.0343452	Rela/Irak3/Trem2	3
GO:0051549	GO:0051549	positive regulation of keratinocyte migration	3/496	13/23210	0.00236479	0.041592	0.0343452	Serpine1/Map4k4/Iqsec1	3
GO:0052646	GO:0052646	alditol phosphate metabolic process	3/496	13/23210	0.00236479	0.041592	0.0343452	Gpam/Gpd2/Slc37a2	3
GO:0006904	GO:0006904	vesicle docking involved in exocytosis	5/496	44/23210	0.00238695	0.041592	0.0343452	Exoc6b/Vps33b/Rab8b/Vps18/Vps11	5
GO:0009163	GO:0009163	nucleoside biosynthetic process	4/496	27/23210	0.00244798	0.041592	0.0343452	Hprt/Ctps/Nt5e/Cmpk1	4
GO:0042455	GO:0042455	ribonucleoside biosynthetic process	4/496	27/23210	0.00244798	0.041592	0.0343452	Hprt/Ctps/Nt5e/Cmpk1	4
GO:0051354	GO:0051354	negative regulation of oxidoreductase activity	4/496	27/23210	0.00244798	0.041592	0.0343452	Aoc3/Gla/Hp/Gsk3b	4
GO:0002351	GO:0002351	serotonin production involved in inflammatory response	2/496	4/23210	0.00265769	0.041592	0.0343452	Fcer1g/Cd300a	2
GO:0002442	GO:0002442	serotonin secretion involved in inflammatory response	2/496	4/23210	0.00265769	0.041592	0.0343452	Fcer1g/Cd300a	2
GO:0002586	GO:0002586	regulation of antigen processing and presentation of peptide antigen via MHC class II	2/496	4/23210	0.00265769	0.041592	0.0343452	Trem2/Pycard	2
GO:0006537	GO:0006537	glutamate biosynthetic process	2/496	4/23210	0.00265769	0.041592	0.0343452	Gls/Slc1a3	2
GO:0006573	GO:0006573	valine metabolic process	2/496	4/23210	0.00265769	0.041592	0.0343452	Bcat1/Aldh6a1	2
GO:0006787	GO:0006787	porphyrin-containing compound catabolic process	2/496	4/23210	0.00265769	0.041592	0.0343452	Hmox1/Blvra	2
GO:0010510	GO:0010510	regulation of acetyl-CoA biosynthetic process from pyruvate	2/496	4/23210	0.00265769	0.041592	0.0343452	Pdk4/Pdk2	2
GO:0032763	GO:0032763	regulation of mast cell cytokine production	2/496	4/23210	0.00265769	0.041592	0.0343452	Hmox1/Fcer1g	2
GO:0042167	GO:0042167	heme catabolic process	2/496	4/23210	0.00265769	0.041592	0.0343452	Hmox1/Blvra	2
GO:0043315	GO:0043315	positive regulation of neutrophil degranulation	2/496	4/23210	0.00265769	0.041592	0.0343452	Itgam/Itgb2	2
GO:0046100	GO:0046100	hypoxanthine metabolic process	2/496	4/23210	0.00265769	0.041592	0.0343452	Hprt/Prps1	2
GO:0046149	GO:0046149	pigment catabolic process	2/496	4/23210	0.00265769	0.041592	0.0343452	Hmox1/Blvra	2
GO:0071963	GO:0071963	establishment or maintenance of cell polarity regulating cell shape	2/496	4/23210	0.00265769	0.041592	0.0343452	Cfl1/Kif3a	2
GO:1902564	GO:1902564	negative regulation of neutrophil activation	2/496	4/23210	0.00265769	0.041592	0.0343452	Abr/Cd300a	2
GO:1902565	GO:1902565	positive regulation of neutrophil activation	2/496	4/23210	0.00265769	0.041592	0.0343452	Itgam/Itgb2	2
GO:1903613	GO:1903613	regulation of protein tyrosine phosphatase activity	2/496	4/23210	0.00265769	0.041592	0.0343452	Ptprc/Mgat5	2
GO:1905907	GO:1905907	negative regulation of amyloid fibril formation	2/496	4/23210	0.00265769	0.041592	0.0343452	Cryab/Ldlr	2
GO:0035335	GO:0035335	peptidyl-tyrosine dephosphorylation	4/496	28/23210	0.00280833	0.0437027	0.0360881	Ptpn6/Ptpn12/Ptprj/Dusp3	4
GO:0033013	GO:0033013	tetrapyrrole metabolic process	5/496	46/23210	0.00290961	0.0447756	0.0369741	Abcd4/Alad/Hmox1/Ireb2/Blvra	5
GO:0043029	GO:0043029	T cell homeostasis	5/496	46/23210	0.00290961	0.0447756	0.0369741	Coro1a/Casp3/Gpam/Nckap1l/Ripk3	5
GO:0009263	GO:0009263	deoxyribonucleotide biosynthetic process	3/496	14/23210	0.00296229	0.0450854	0.0372299	Rrm1/Tbpl1/Cmpk1	3
GO:0046459	GO:0046459	short-chain fatty acid metabolic process	3/496	14/23210	0.00296229	0.0450854	0.0372299	Ces1d/Ces1f/Pck1	3
GO:0051489	GO:0051489	regulation of filopodium assembly	5/496	47/23210	0.00319979	0.0479638	0.0396068	Fmr1/Capzb/Fscn1/Arpc2/Palm	5
GO:0006536	GO:0006536	glutamate metabolic process	4/496	29/23210	0.00320336	0.0479638	0.0396068	Gls/Slc1a3/Dglucy/Prodh	4
GO:1900027	GO:1900027	regulation of ruffle assembly	4/496	29/23210	0.00320336	0.0479638	0.0396068	Evl/Plekhm1/Stap1/Coro1c	4

## Sheet: Visceral Low-INFL gseGO_p.0.05
	ID	Description	GeneRatio	BgRatio	pvalue	p.adjust	qvalue	geneID	Count
GO:0010898	GO:0010898	positive regulation of triglyceride catabolic process	4/163	9/23210	2.87409e-07	0.00030839	0.000212985	Pnpla2/Apoa4/Apoc2/Ldlr	4
GO:0010896	GO:0010896	regulation of triglyceride catabolic process	4/163	14/23210	2.22149e-06	0.00119183	0.000823121	Pnpla2/Apoa4/Apoc2/Ldlr	4
GO:0010883	GO:0010883	regulation of lipid storage	5/163	42/23210	1.10763e-05	0.00396162	0.00273604	Pnpla2/Tmem135/Mest/Apoc4/Lep	5
GO:0019433	GO:0019433	triglyceride catabolic process	4/163	26/23210	3.10666e-05	0.00648637	0.00447972	Pnpla2/Apoa4/Apoc2/Ldlr	4
GO:0090208	GO:0090208	positive regulation of triglyceride metabolic process	4/163	26/23210	3.10666e-05	0.00648637	0.00447972	Pnpla2/Apoa4/Apoc2/Ldlr	4
GO:0050996	GO:0050996	positive regulation of lipid catabolic process	4/163	27/23210	3.62705e-05	0.00648637	0.00447972	Pnpla2/Apoa4/Apoc2/Ldlr	4
GO:0006084	GO:0006084	acetyl-CoA metabolic process	4/163	33/23210	8.18393e-05	0.0111142	0.00767589	Acly/Acaca/Hmgcs1/Mvd	4
GO:0030299	GO:0030299	intestinal cholesterol absorption	3/163	13/23210	9.23511e-05	0.0111142	0.00767589	Apoa4/Ldlr/Lep	3
GO:0046461	GO:0046461	neutral lipid catabolic process	4/163	35/23210	0.000103581	0.0111142	0.00767589	Pnpla2/Apoa4/Apoc2/Ldlr	4
GO:0046464	GO:0046464	acylglycerol catabolic process	4/163	35/23210	0.000103581	0.0111142	0.00767589	Pnpla2/Apoa4/Apoc2/Ldlr	4
GO:0043456	GO:0043456	regulation of pentose-phosphate shunt	2/163	3/23210	0.000146379	0.013646	0.00942441	Hsd11b1/Tigar	2
GO:0044241	GO:0044241	lipid digestion	3/163	16/23210	0.000178046	0.013646	0.00942441	Apoa4/Ldlr/Lep	3
GO:0098856	GO:0098856	intestinal lipid absorption	3/163	16/23210	0.000178046	0.013646	0.00942441	Apoa4/Ldlr/Lep	3
GO:1990000	GO:1990000	amyloid fibril formation	3/163	16/23210	0.000178046	0.013646	0.00942441	Ripk3/Cryab/Ldlr	3
GO:0090207	GO:0090207	regulation of triglyceride metabolic process	4/163	45/23210	0.000279094	0.0195423	0.0134967	Pnpla2/Apoa4/Apoc2/Ldlr	4
GO:1905907	GO:1905907	negative regulation of amyloid fibril formation	2/163	4/23210	0.000291405	0.0195423	0.0134967	Cryab/Ldlr	2
GO:0033003	GO:0033003	regulation of mast cell activation	4/163	50/23210	0.000419798	0.0264967	0.0182996	Fes/Hmox1/Ptpre/Cd300a	4
GO:0060696	GO:0060696	regulation of phospholipid catabolic process	2/163	5/23210	0.000483431	0.0273011	0.0188552	Apoc2/Ldlr	2
GO:1902031	GO:1902031	regulation of NADP metabolic process	2/163	5/23210	0.000483431	0.0273011	0.0188552	Hsd11b1/Tigar	2
GO:0045723	GO:0045723	positive regulation of fatty acid biosynthetic process	3/163	24/23210	0.000617501	0.0331289	0.02288	Lpgat1/Apoa4/Apoc2	3
GO:0043305	GO:0043305	negative regulation of mast cell degranulation	2/163	6/23210	0.000721799	0.0368805	0.025471	Hmox1/Cd300a	2
GO:0008340	GO:0008340	determination of adult lifespan	3/163	27/23210	0.00087871	0.0428571	0.0295987	Tmem135/Lep/Inpp5d	3
GO:1905906	GO:1905906	regulation of amyloid fibril formation	2/163	7/23210	0.00100586	0.0469253	0.0324083	Cryab/Ldlr	2
GO:0006734	GO:0006734	NADH metabolic process	3/163	29/23210	0.00108648	0.0485746	0.0335474	Gpd2/Tigar/Slc37a2	3
