# Supplementary material for: SMYD3: a new regulator of adipocyte precursor proliferation at the early steps of differentiation
Source: Int J Obes (Lond). 2023 Dec 26;48(4):557–66. doi: 10.1038/s41366-023-01450-x (PMC10978492; doi:10.1038/s41366-023-01450-x)
Supplement: Supplementary file 4 — Supplementary Table 4 [file 41366_2023_1450_MOESM4_ESM.xlsx]

## Sheet: visceral PLS comp 1
UniProtIds	Genes	ProteinDescriptions	ProteinNames		value.var
A1L314	Mpeg1	Macrophage-expressed gene 1 protein	MPEG1_MOUSE		-0.0571584
A6H5Z3	Exoc6b	Exocyst complex component 6B	EXC6B_MOUSE		-0.0452629
O35177	Nedd9	Enhancer of filamentation 1	CASL_MOUSE		-0.0139048
O35601	Fyb1	FYN-binding protein 1	FYB1_MOUSE		-0.0431865
O54998	Fkbp7	Peptidyl-prolyl cis-trans isomerase FKBP7	FKBP7_MOUSE		-0.0319114
O70458	Osmr	Oncostatin-M-specific receptor subunit beta	OSMR_MOUSE		-0.00735185
O89016	Abcd4	ATP-binding cassette sub-family D member 4	ABCD4_MOUSE		-0.196407
P11247	Mpo	Myeloperoxidase	PERM_MOUSE		-0.00679691
P14901	Hmox1	Heme oxygenase 1	HMOX1_MOUSE		-0.00725212
P15306	Thbd	Thrombomodulin	TRBM_MOUSE		0.0023553
P19324	Serpinh1	Serpin H1	SERPH_MOUSE		-0.0964624
P23927	Cryab	Alpha-crystallin B chain	CRYAB_MOUSE		-0.069777
P24288	Bcat1	Branched-chain-amino-acid aminotransferase, cytosolic	BCAT1_MOUSE		-0.132869
P40338	Vhl	von Hippel-Lindau disease tumor suppressor	VHL_MOUSE		-0.239806
P40936	Inmt	Indolethylamine N-methyltransferase	INMT_MOUSE		0.00959324
P41160	Lep	Leptin	LEP_MOUSE		-0.0294676
P43883	Plin2	Perilipin-2	PLIN2_MOUSE		-0.0900684
P49446	Ptpre	Receptor-type tyrosine-protein phosphatase epsilon	PTPRE_MOUSE		-0.194216
P49718	Mcm5	DNA replication licensing factor MCM5	MCM5_MOUSE		-0.150264
P50172	Hsd11b1	Corticosteroid 11-beta-dehydrogenase isozyme 1	DHI1_MOUSE		0.0584811
P54103	Dnajc2	DnaJ homolog subfamily C member 2	DNJC2_MOUSE		-0.0351438
P56198	Cidec	Cell death activator CIDE-3	CIDEC_MOUSE		-0.0127596
P56485	Ackr3	Atypical chemokine receptor 3	ACKR3_MOUSE		-0.0733083
P70387	Hfe	Hereditary hemochromatosis protein homolog	HFE_MOUSE		-0.0388801
P70429	Evl	Ena/VASP-like protein	EVL_MOUSE		-0.0781041
P83093	Stim2	Stromal interaction molecule 2	STIM2_MOUSE		-0.0542895
Q05020	Apoc2	Apolipoprotein C-II	APOC2_MOUSE		-0.00934695
Q07646	Mest	Mesoderm-specific transcript protein	MEST_MOUSE		-0.169794
Q3V1T4	P3h1	Prolyl 3-hydroxylase 1	P3H1_MOUSE		-0.0484772
Q5EBG6	Hspb6	Heat shock protein beta-6	HSPB6_MOUSE		-0.029284
Q5SWU9	Acaca	Acetyl-CoA carboxylase 1	ACACA_MOUSE		0.156973
Q60860	Ltc4s	Leukotriene C4 synthase	LTC4S_MOUSE		-0.055205
Q60872	Eif1a	Eukaryotic translation initiation factor 1A	IF1A_MOUSE		-0.0357032
Q60875	Arhgef2	Rho guanine nucleotide exchange factor 2	ARHG2_MOUSE		-0.0479509
Q61216	Mre11	Double-strand break repair protein MRE11	MRE11_MOUSE		-0.0262637
Q61268	Apoc4	Apolipoprotein C-IV	APOC4_MOUSE		-0.0418813
Q61805	Lbp	Lipopolysaccharide-binding protein	LBP_MOUSE		-0.0975937
Q63739	Ptp4a1	Protein tyrosine phosphatase type IVA 1	TP4A1_MOUSE		-0.161415
Q64449	Mrc2	C-type mannose receptor 2	MRC2_MOUSE		-0.0571649
Q64521	Gpd2	Glycerol-3-phosphate dehydrogenase, mitochondrial	GPDM_MOUSE		0.135031
Q6A0A2	Larp4b	La-related protein 4B	LAR4B_MOUSE		-0.00513905
Q6NSU3	Glt8d1	Glycosyltransferase 8 domain-containing protein 1	GL8D1_MOUSE		-0.00165812
Q6QLQ4	Clec7a	C-type lectin domain family 7 member A	CLC7A_MOUSE		-0.0715294
Q6TCG2	Paqr9	Membrane progesterone receptor epsilon	PAQR9_MOUSE		-0.0869547
Q76N33	Stambpl1	AMSH-like protease	STALP_MOUSE		-0.128697
Q7TMW6	Ciao3	Cytosolic iron-sulfur assembly component 3	CIAO3_MOUSE		-0.00539585
Q7TSI1	Plekhm1	Pleckstrin homology domain-containing family M member 1	PKHM1_MOUSE		-0.0733603
Q80UG5	40057	Septin-9	SEPT9_MOUSE		-0.0689603
Q80XC2	Trmt61a	tRNA (adenine(58)-N(1))-methyltransferase catalytic subunit TRMT61A	TRM61_MOUSE		-0.0791139
Q8BGY9	Slc5a7	High affinity choline transporter 1	SC5A7_MOUSE		-0.223449
Q8BH86	Dglucy	D-glutamate cyclase, mitochondrial	GLUCM_MOUSE		-0.0780189
Q8BHZ0	Fam49a	Protein FAM49A	FA49A_MOUSE		-0.00156739
Q8BJ56	Pnpla2	Patatin-like phospholipase domain-containing protein 2	PLPL2_MOUSE		0.0947256
Q8BW75	Maob	Amine oxidase [flavin-containing] B	AOFB_MOUSE		0.0188464
Q8BZA9	Tigar	Fructose-2,6-bisphosphatase TIGAR	TIGAR_MOUSE		-0.0580112
Q8C255	Dpep2	Dipeptidase 2	DPEP2_MOUSE		-0.195463
Q8CBA2	Slfn5	Schlafen family member 5	SLFN5_MOUSE		-0.0428495
Q8CCK0	H2afy2	Core histone macro-H2A.2	H2AW_MOUSE		0.063924
Q8CIG9	Fbxl8	F-box/LRR-repeat protein 8	FBXL8_MOUSE		-0.0329532
Q8CJ12	Adgrg2	Adhesion G-protein coupled receptor G2	AGRG2_MOUSE		0.105531
Q8JZK9	Hmgcs1	Hydroxymethylglutaryl-CoA synthase, cytoplasmic	HMCS1_MOUSE		-0.084131
Q8K4X7	Agpat4	1-acyl-sn-glycerol-3-phosphate acyltransferase delta	PLCD_MOUSE		-0.148639
Q8R087	B4galt7	Beta-1,4-galactosyltransferase 7	B4GT7_MOUSE		-0.0619836
Q8VBX6	Mpdz	Multiple PDZ domain protein	MPDZ_MOUSE		-0.0876121
Q8VCB3	Gys2	Glycogen [starch] synthase, liver	GYS2_MOUSE		-0.0122975
Q8VD65	Pik3r4	Phosphoinositide 3-kinase regulatory subunit 4	PI3R4_MOUSE		-0.106368
Q91V92	Acly	ATP-citrate synthase	ACLY_MOUSE		0.145511
Q91WK0	Lrrfip2	Leucine-rich repeat flightless-interacting protein 2	LRRF2_MOUSE		-0.131204
Q91WU0	Ces1f	Carboxylesterase 1F	CES1F_MOUSE		0.00239047
Q91YE8	Synpo2	Synaptopodin-2	SYNP2_MOUSE		-0.0404715
Q91ZU6	Dst	Dystonin	DYST_MOUSE		-0.102553
Q922S4	Pde2a	cGMP-dependent 3',5'-cyclic phosphodiesterase	PDE2A_MOUSE		-0.185835
Q99JF5	Mvd	Diphosphomevalonate decarboxylase	MVD1_MOUSE		-0.134276
Q99JR1	Sfxn1	Sideroflexin-1	SFXN1_MOUSE		0.0212914
Q99M71	Epdr1	Mammalian ependymin-related protein 1	EPDR1_MOUSE		-0.0249402
Q9CQ02	Commd4	COMM domain-containing protein 4	COMD4_MOUSE		-0.237858
Q9CQI3	Gmfb	Glia maturation factor beta	GMFB_MOUSE		-0.0349677
Q9CYV5	Tmem135	Transmembrane protein 135	TM135_MOUSE		-0.0442238
Q9D2R0	Aacs	Acetoacetyl-CoA synthetase	AACS_MOUSE		0.10733
Q9D6J1	Cers4	Ceramide synthase 4	CERS4_MOUSE		-0.040715
Q9D7G0	Prps1	Ribose-phosphate pyrophosphokinase 1	PRPS1_MOUSE		-0.000924945
Q9D8S4	Rexo2	Oligoribonuclease, mitochondrial	ORN_MOUSE		-0.237898
Q9D975	Srxn1	Sulfiredoxin-1	SRXN1_MOUSE		-0.170732
Q9DBS2	Tprg1l	Tumor protein p63-regulated gene 1-like protein	TPRGL_MOUSE		-0.200686
Q9EP71	Rai14	Ankycorbin	RAI14_MOUSE		-0.0514838
Q9EPK5	Wwtr1	WW domain-containing transcription regulator protein 1	WWTR1_MOUSE		-0.144329
Q9EQQ2	Yipf5	Protein YIPF5	YIPF5_MOUSE		-0.00374234
Q9ES52	Inpp5d	Phosphatidylinositol 3,4,5-trisphosphate 5-phosphatase 1	SHIP1_MOUSE		-0.235986
Q9ES70	Nek6	Serine/threonine-protein kinase Nek6	NEK6_MOUSE		-0.020688
Q9ET54	Palld	Palladin	PALLD_MOUSE		-0.114222
Q9JKY0	Cnot9	CCR4-NOT transcription complex subunit 9	CNOT9_MOUSE		-0.0921501
Q9JLM8	Dclk1	Serine/threonine-protein kinase DCLK1	DCLK1_MOUSE		-0.102128
Q9JM52	Mink1	Misshapen-like kinase 1	MINK1_MOUSE		-0.0142759
Q9QUT0	Rhag	Ammonium transporter Rh type A	RHAG_MOUSE		-0.0471363
Q9QYR6	Map1a	Microtubule-associated protein 1A	MAP1A_MOUSE		-0.0527198
Q9QZL0	Ripk3	Receptor-interacting serine/threonine-protein kinase 3	RIPK3_MOUSE		-0.0156276
Q9R0B9	Plod2	Procollagen-lysine,2-oxoglutarate 5-dioxygenase 2	PLOD2_MOUSE		-0.0664462
Q9R1Q6	Tmem176b	Transmembrane protein 176B	T176B_MOUSE		-0.0145639
Q9WU81	Slc37a2	Glucose-6-phosphate exchanger SLC37A2	G6PT3_MOUSE		-0.0179628
Q9Z2D3	Gsdme	Gasdermin-E	GSDME_MOUSE		-0.0496996

## Sheet: visceral PLS comp 2
UniProtIds	Genes	ProteinDescriptions	ProteinNames		value.var
A2AQ25	Skt	Sickle tail protein	SKT_MOUSE		-0.159774
A3KMP2	Ttc38	Tetratricopeptide repeat protein 38	TTC38_MOUSE		-0.0322969
B1AUE5	Pex10	Peroxisome biogenesis factor 10	PEX10_MOUSE		-0.182299
B1AXP6	Tomm5	Mitochondrial import receptor subunit TOM5 homolog	TOM5_MOUSE		-0.00043664
O35114	Scarb2	Lysosome membrane protein 2	SCRB2_MOUSE		0.0401835
O35660	Gstm6	Glutathione S-transferase Mu 6	GSTM6_MOUSE		-0.127488
O35704	Sptlc1	Serine palmitoyltransferase 1	SPTC1_MOUSE		0.0168096
O70348	Dxo	Decapping and exoribonuclease protein	DXO_MOUSE		-0.0364786
O88495	Gpr50	Melatonin-related receptor	MTR1L_MOUSE		0.0897824
P01660		Ig kappa chain V-III region PC 3741/TEPC 111	KV3A8_MOUSE		0.0207996
P01758	Igh-VJ558	Ig heavy chain V region 108A	HVM14_MOUSE		-0.176369
P01899	H2-D1	H-2 class I histocompatibility antigen, D-B alpha chain	HA11_MOUSE		0.0892381
P12791	Cyp2b10	Cytochrome P450 2B10	CP2BA_MOUSE		-0.0142594
P13597	Icam1	Intercellular adhesion molecule 1	ICAM1_MOUSE		0.132986
P15261	Ifngr1	Interferon gamma receptor 1	INGR1_MOUSE		-0.00337622
P17897	Lyz1	Lysozyme C-1	LYZ1_MOUSE		0.114624
P18181	Cd48	CD48 antigen	CD48_MOUSE		0.00065278
P26151	Fcgr1	High affinity immunoglobulin gamma Fc receptor I	FCGR1_MOUSE		0.0277896
P34960	Mmp12	Macrophage metalloelastase	MMP12_MOUSE		0.0901117
P48410	Abcd1	ATP-binding cassette sub-family D member 1	ABCD1_MOUSE		0.0286419
P54310	Lipe	Hormone-sensitive lipase	LIPS_MOUSE		-0.191623
P60766	Cdc42	Cell division control protein 42 homolog	CDC42_MOUSE		0.0610761
P63260	Actg1	Actin, cytoplasmic 2	ACTG_MOUSE		0.0489917
Q08288	Lyar	Cell growth-regulating nucleolar protein	LYAR_MOUSE		0.0109426
Q3TXS7	Psmd1	26S proteasome non-ATPase regulatory subunit 1	PSMD1_MOUSE		0.129816
Q3ULJ0	Gpd1l	Glycerol-3-phosphate dehydrogenase 1-like protein	GPD1L_MOUSE		0.0495291
Q3UMR0	Ankrd27	Ankyrin repeat domain-containing protein 27	ANR27_MOUSE		-0.148727
Q3URD3	Slmap	Sarcolemmal membrane-associated protein	SLMAP_MOUSE		0.064512
Q3USZ8	Dipk2a	Divergent protein kinase domain 2A	DIK2A_MOUSE		-0.360357
Q3UVK0	Ermp1	Endoplasmic reticulum metallopeptidase 1	ERMP1_MOUSE		-0.10163
Q4JIM5	Abl2	Tyrosine-protein kinase ABL2	ABL2_MOUSE		0.0310947
Q505D9	Trim67	Tripartite motif-containing protein 67	TRI67_MOUSE		-0.0604254
Q52KR3	Prune2	Protein prune homolog 2	PRUN2_MOUSE		0.0364754
Q5RKZ7	Mocs1	Molybdenum cofactor biosynthesis protein 1	MOCS1_MOUSE		-0.173502
Q5SSL4	Abr	Active breakpoint cluster region-related protein	ABR_MOUSE		0.114489
Q60967	Papss1	Bifunctional 3'-phosphoadenosine 5'-phosphosulfate synthase 1	PAPS1_MOUSE		0.000450728
Q60994	Adipoq	Adiponectin	ADIPO_MOUSE		-0.0265244
Q61549	Adgre1	Adhesion G protein-coupled receptor E1	AGRE1_MOUSE		0.127982
Q61592	Gas6	Growth arrest-specific protein 6	GAS6_MOUSE		-0.179202
Q61753	Phgdh	D-3-phosphoglycerate dehydrogenase	SERA_MOUSE		-0.128211
Q64345	Ifit3	Interferon-induced protein with tetratricopeptide repeats 3	IFIT3_MOUSE		-0.0378214
Q64362	Aktip	AKT-interacting protein	AKTIP_MOUSE		-0.0827063
Q6A068	Cdc5l	Cell division cycle 5-like protein	CDC5L_MOUSE		-0.00252549
Q6NXM2	Rcbtb1	RCC1 and BTB domain-containing protein 1	RCBT1_MOUSE		-0.0590385
Q6P8M1	Tatdn1	Putative deoxyribonuclease TATDN1	TATD1_MOUSE		0.0750024
Q6S5J6	Krit1	Krev interaction trapped protein 1	KRIT1_MOUSE		-0.0261137
Q6TYB5	Fez2	Fasciculation and elongation protein zeta-2	FEZ2_MOUSE		0.100245
Q6ZQ88	Kdm1a	Lysine-specific histone demethylase 1A	KDM1A_MOUSE		-0.274724
Q7TNE3	Spag7	Sperm-associated antigen 7	SPAG7_MOUSE		0.00446923
Q7TQ62	Podn	Podocan	PODN_MOUSE		-0.203705
Q7TSH2	Phkb	Phosphorylase b kinase regulatory subunit beta	KPBB_MOUSE		-0.0519509
Q80SZ7	Gng5	Guanine nucleotide-binding protein G(I)/G(S)/G(O) subunit gamma-5	GBG5_MOUSE		-0.0596371
Q80U58	Pum2	Pumilio homolog 2	PUM2_MOUSE		0.0206611
Q80UG2	Plxna4	Plexin-A4	PLXA4_MOUSE		-0.0825704
Q80W68	Kirrel1	Kin of IRRE-like protein 1	KIRR1_MOUSE		-0.0414339
Q80YN3	Bcas1	Breast carcinoma-amplified sequence 1 homolog	BCAS1_MOUSE		0.0694398
Q8BK75	Elp6	Elongator complex protein 6	ELP6_MOUSE		-0.108527
Q8BLY1	Smoc1	SPARC-related modular calcium-binding protein 1	SMOC1_MOUSE		-0.0134387
Q8BR90		UPF0600 protein C5orf51 homolog	CE051_MOUSE		-0.0107431
Q8BU31	Rap2c	Ras-related protein Rap-2c	RAP2C_MOUSE		0.080835
Q8CFH6	Sik2	Serine/threonine-protein kinase SIK2	SIK2_MOUSE		-0.0761667
Q8K009	Aldh1l2	Mitochondrial 10-formyltetrahydrofolate dehydrogenase	AL1L2_MOUSE		0.124391
Q8K021	Scamp1	Secretory carrier-associated membrane protein 1	SCAM1_MOUSE		-0.0806083
Q8K382	Dennd1a	DENN domain-containing protein 1A	DEN1A_MOUSE		0.143858
Q8R4T1	Cys1	Cystin-1	CYS1_MOUSE		-0.0379088
Q8VBT2	Sds	L-serine dehydratase/L-threonine deaminase	SDHL_MOUSE		-0.0225921
Q8VEK2	Rhbdd2	Rhomboid domain-containing protein 2	RHBD2_MOUSE		-0.0306624
Q91W92	Cdc42ep1	Cdc42 effector protein 1	BORG5_MOUSE		-0.0536918
Q925N2	Sfxn2	Sideroflexin-2	SFXN2_MOUSE		0.110123
Q99JR8	Smarcd2	SWI/SNF-related matrix-associated actin-dependent regulator of chromatin subfamily D member 2	SMRD2_MOUSE		-0.0714202
Q99L88	Sntb1	Beta-1-syntrophin	SNTB1_MOUSE		-0.110398
Q99MB7	Rnf141	RING finger protein 141	RN141_MOUSE		-0.0542936
Q99P87	Retn	Resistin	RETN_MOUSE		-0.00137554
Q9CQE3	Mrps17	28S ribosomal protein S17, mitochondrial	RT17_MOUSE		-0.192974
Q9CQF0	Mrpl11	39S ribosomal protein L11, mitochondrial	RM11_MOUSE		-0.0732004
Q9CR24	Nudt8	Nucleoside diphosphate-linked moiety X motif 8	NUDT8_MOUSE		-0.016006
Q9CRA4	Msmo1	Methylsterol monooxygenase 1	MSMO1_MOUSE		0.0671051
Q9CWR2	Smyd3	Histone-lysine N-methyltransferase SMYD3	SMYD3_MOUSE		-0.0756434
Q9CY58	Serbp1	Plasminogen activator inhibitor 1 RNA-binding protein	PAIRB_MOUSE		0.13806
Q9CZJ2	Hspa12b	Heat shock 70 kDa protein 12B	HS12B_MOUSE		-0.0494034
Q9D6F9	Tubb4a	Tubulin beta-4A chain	TBB4A_MOUSE		0.0470577
Q9D8C2	Tspan13	Tetraspanin-13	TSN13_MOUSE		-0.148708
Q9DAM5	Slc25a19	Mitochondrial thiamine pyrophosphate carrier	TPC_MOUSE		-0.0239333
Q9DBG6	Rpn2	Dolichyl-diphosphooligosaccharide--protein glycosyltransferase subunit 2	RPN2_MOUSE		0.026799
Q9DCM2	Gstk1	Glutathione S-transferase kappa 1	GSTK1_MOUSE		-0.00753779
Q9EQP2	Ehd4	EH domain-containing protein 4	EHD4_MOUSE		0.0291371
Q9ER64	Osbpl5	Oxysterol-binding protein-related protein 5	OSBL5_MOUSE		-0.0532469
Q9ERU9	Ranbp2	E3 SUMO-protein ligase RanBP2	RBP2_MOUSE		0.0241883
Q9JHF7	Hpgds	Hematopoietic prostaglandin D synthase	HPGDS_MOUSE		0.0464965
Q9JKC7	Ap4m1	AP-4 complex subunit mu-1	AP4M1_MOUSE		0.0574993
Q9JLQ2	Git2	ARF GTPase-activating protein GIT2	GIT2_MOUSE		0.0429649
Q9JM96	Cdc42ep4	Cdc42 effector protein 4	BORG4_MOUSE		-0.0339785
Q9QUK4	Naip2	Baculoviral IAP repeat-containing protein 1b	BIR1B_MOUSE		0.0657898
Q9QXY6	Ehd3	EH domain-containing protein 3	EHD3_MOUSE		-0.226964
Q9QYG0	Ndrg2	Protein NDRG2	NDRG2_MOUSE		-0.0490453
Q9WUK4	Rfc2	Replication factor C subunit 2	RFC2_MOUSE		0.153422
Q9WV68	Decr2	Peroxisomal 2,4-dienoyl-CoA reductase	DECR2_MOUSE		-0.079613
Q9WV95	Phlda3	Pleckstrin homology-like domain family A member 3	PHLA3_MOUSE		-0.102317
Q9Z2A9	Ggt5	Glutathione hydrolase 5 proenzyme	GGT5_MOUSE		0.0255414
Q9Z2C4	Mtmr1	Myotubularin-related protein 1	MTMR1_MOUSE		-0.0791694

## Sheet: visceral PLS comp 3
UniProtIds	Genes	ProteinDescriptions	ProteinNames		value.var
O08605	Mknk1	MAP kinase-interacting serine/threonine-protein kinase 1	MKNK1_MOUSE		-0.00466727
O54905	B3galt2	Beta-1,3-galactosyltransferase 2	B3GT2_MOUSE		0.0957527
O55102	Bloc1s1	Biogenesis of lysosome-related organelles complex 1 subunit 1	BL1S1_MOUSE		-0.0184649
P00688	Amy2	Pancreatic alpha-amylase	AMYP_MOUSE		0.0303952
P01660		Ig kappa chain V-III region PC 3741/TEPC 111	KV3A8_MOUSE		0.0257501
P01872	Ighm	Immunoglobulin heavy constant mu	IGHM_MOUSE		0.00919933
P01942	Hba	Hemoglobin subunit alpha	HBA_MOUSE		0.0814933
P03921	Mtnd5	NADH-ubiquinone oxidoreductase chain 5	NU5M_MOUSE		0.040239
P04370	Mbp	Myelin basic protein	MBP_MOUSE		0.00699084
P09541	Myl4	Myosin light chain 4	MYL4_MOUSE		0.0200584
P09542	Myl3	Myosin light chain 3	MYL3_MOUSE		0.103807
P14430	H2-Q8	H-2 class I histocompatibility antigen, Q8 alpha chain	HA18_MOUSE		0.106971
P16301	Lcat	Phosphatidylcholine-sterol acyltransferase	LCAT_MOUSE		0.0433402
P17717	Ugt2b17	UDP-glucuronosyltransferase 2B17	UDB17_MOUSE		0.136079
P20934	Evi2a	Protein EVI2A	EVI2A_MOUSE		-0.0078931
P21619	Lmnb2	Lamin-B2	LMNB2_MOUSE		-0.0283202
P23953	Ces1c	Carboxylesterase 1C	EST1C_MOUSE		0.0540887
P24788	Cdk11b	Cyclin-dependent kinase 11B	CD11B_MOUSE		-0.0375428
P27784	Ccl6	C-C motif chemokine 6	CCL6_MOUSE		-0.0661002
P31266	Rbpj	Recombining binding protein suppressor of hairless	SUH_MOUSE		-0.141619
P35288	Rab23	Ras-related protein Rab-23	RAB23_MOUSE		-0.182273
P35492	Hal	Histidine ammonia-lyase	HUTH_MOUSE		0.113997
P40240	Cd9	CD9 antigen	CD9_MOUSE		-0.0124282
P46694	Ier3	Radiation-inducible immediate-early gene IEX-1	IEX1_MOUSE		-0.026845
P63044	Vamp2	Vesicle-associated membrane protein 2	VAMP2_MOUSE		0.0578181
P70269	Ctse	Cathepsin E	CATE_MOUSE		0.0284887
P70426	Rit1	GTP-binding protein Rit1	RIT1_MOUSE		-0.0351867
P98195	Atp9b	Probable phospholipid-transporting ATPase IIB	ATP9B_MOUSE		0.20071
Q01063	Pde4d	cAMP-specific 3',5'-cyclic phosphodiesterase 4D	PDE4D_MOUSE		0.0205205
Q14BA6	Medag	Mesenteric estrogen-dependent adipogenesis protein	MEDAG_MOUSE		0.0910302
Q3TLI0	Trappc10	Trafficking protein particle complex subunit 10	TPC10_MOUSE		0.0730797
Q3TWN3	Cnnm2	Metal transporter CNNM2	CNNM2_MOUSE		0.15066
Q3U276	Sdhaf1	Succinate dehydrogenase assembly factor 1, mitochondrial	SDHF1_MOUSE		-0.000775192
Q3UM18	Lsg1	Large subunit GTPase 1 homolog	LSG1_MOUSE		0.0038069
Q571I4	Prag1	Inactive tyrosine-protein kinase PRAG1	PRAG1_MOUSE		-0.000114694
Q5F285	Tmem256	Transmembrane protein 256	TM256_MOUSE		0.0107097
Q5SUF2	Luc7l3	Luc7-like protein 3	LC7L3_MOUSE		-0.0346983
Q61009	Scarb1	Scavenger receptor class B member 1	SCRB1_MOUSE		0.0454632
Q61093	Cybb	Cytochrome b-245 heavy chain	CY24B_MOUSE		-0.0420375
Q61686	Cbx5	Chromobox protein homolog 5	CBX5_MOUSE		-0.0350259
Q62178	Sema4a	Semaphorin-4A	SEM4A_MOUSE		0.0429178
Q63880	Ces3a	Carboxylesterase 3A	EST3A_MOUSE		0.0414046
Q64008	Rab34	Ras-related protein Rab-34	RAB34_MOUSE		0.0421824
Q64281	Lilrb4	Leukocyte immunoglobulin-like receptor subfamily B member 4	LIRB4_MOUSE		-0.112451
Q64318	Zeb1	Zinc finger E-box-binding homeobox 1	ZEB1_MOUSE		0.0309406
Q6DFX2	Antxr2	Anthrax toxin receptor 2	ANTR2_MOUSE		-0.00474502
Q6NXN1	Szrd1	SUZ domain-containing protein 1	SZRD1_MOUSE		0.109859
Q6P5C5	Smug1	Single-strand selective monofunctional uracil DNA glycosylase	SMUG1_MOUSE		-0.114792
Q6PDJ1	Cachd1	VWFA and cache domain-containing protein 1	CAHD1_MOUSE		0.00783615
Q80V86	Ints8	Integrator complex subunit 8	INT8_MOUSE		-0.25819
Q8BFW4	Trim65	Tripartite motif-containing protein 65	TRI65_MOUSE		-0.137589
Q8BJZ3	Tmbim1	Protein lifeguard 3	LFG3_MOUSE		0.00298787
Q8BLR5	Psd4	PH and SEC7 domain-containing protein 4	PSD4_MOUSE		-0.084906
Q8BWQ1	Ugt2a3	UDP-glucuronosyltransferase 2A3	UD2A3_MOUSE		0.0486862
Q8C0K5	Slc25a16	Graves disease carrier protein homolog	GDC_MOUSE		0.216513
Q8C5Q4	Grsf1	G-rich sequence factor 1	GRSF1_MOUSE		-0.117163
Q8CB44	Gramd4	GRAM domain-containing protein 4	GRAM4_MOUSE		0.000840891
Q8CD10	Micu2	Calcium uptake protein 2, mitochondrial	MICU2_MOUSE		-0.0179035
Q8CDA1	Inpp5f	Phosphatidylinositide phosphatase SAC2	SAC2_MOUSE		-0.244261
Q8JZL3	Thtpa	Thiamine-triphosphatase	THTPA_MOUSE		0.130453
Q8K1R3	Pnpt1	Polyribonucleotide nucleotidyltransferase 1, mitochondrial	PNPT1_MOUSE		-0.0533716
Q8K2Y7	Mrpl47	39S ribosomal protein L47, mitochondrial	RM47_MOUSE		0.0758527
Q8K4D3	Slc36a1	Proton-coupled amino acid transporter 1	S36A1_MOUSE		-0.0672323
Q8K4R4	Pitpnc1	Cytoplasmic phosphatidylinositol transfer protein 1	PITC1_MOUSE		-0.113914
Q8R191	Syngr3	Synaptogyrin-3	SNG3_MOUSE		-0.000664323
Q8R2Y3	Dolk	Dolichol kinase	DOLK_MOUSE		0.0775645
Q8VBV3	Exosc2	Exosome complex component RRP4	EXOS2_MOUSE		-0.0641545
Q8VC04	Tmem106a	Transmembrane protein 106A	T106A_MOUSE		-0.040191
Q8VCE2	Gpn1	GPN-loop GTPase 1	GPN1_MOUSE		-0.024251
Q8VCH5	Rabepk	Rab9 effector protein with kelch motifs	RABEK_MOUSE		-0.286884
Q8VE19	Mios	GATOR complex protein MIOS	MIO_MOUSE		0.0234721
Q8VHK9	Dhx36	ATP-dependent DNA/RNA helicase DHX36	DHX36_MOUSE		-0.223918
Q91WC3	Acsl6	Long-chain-fatty-acid--CoA ligase 6	ACSL6_MOUSE		0.0231127
Q91XB0	Trex1	Three-prime repair exonuclease 1	TREX1_MOUSE		-0.126272
Q91XC8	Dap	Death-associated protein 1	DAP1_MOUSE		-0.0487121
Q923Z0	Gprc5b	G-protein coupled receptor family C group 5 member B	GPC5B_MOUSE		0.0743984
Q924Z6	Xpo6	Exportin-6	XPO6_MOUSE		-0.0155757
Q99JP0	Map4k3	Mitogen-activated protein kinase kinase kinase kinase 3	M4K3_MOUSE		-0.0700531
Q99LX5	Mmtag2	Multiple myeloma tumor-associated protein 2 homolog	MMTA2_MOUSE		-0.0733612
Q99MU3	Adar	Double-stranded RNA-specific adenosine deaminase	DSRAD_MOUSE		-0.0493979
Q99PU8	Dhx30	ATP-dependent RNA helicase DHX30	DHX30_MOUSE		-0.200957
Q9CQP3	Chchd5	Coiled-coil-helix-coiled-coil-helix domain-containing protein 5	CHCH5_MOUSE		-0.0484416
Q9CRB6	Tppp3	Tubulin polymerization-promoting protein family member 3	TPPP3_MOUSE		-0.0253515
Q9CXL3		Uncharacterized protein C7orf50 homolog	CG050_MOUSE		-0.119152
Q9CXP8	Gng10	Guanine nucleotide-binding protein G(I)/G(S)/G(O) subunit gamma-10	GBG10_MOUSE		-0.116204
Q9D0B0	Srsf9	Serine/arginine-rich splicing factor 9	SRSF9_MOUSE		-0.20105
Q9D159	Mrap	Melanocortin-2 receptor accessory protein	MRAP_MOUSE		0.0322893
Q9D7A8	Armc1	Armadillo repeat-containing protein 1	ARMC1_MOUSE		0.0234505
Q9D8L5	Ccdc91	Coiled-coil domain-containing protein 91	CCD91_MOUSE		0.0178735
Q9D920	Borcs5	BLOC-1-related complex subunit 5	BORC5_MOUSE		-0.0638992
Q9EQX4	Aif1l	Allograft inflammatory factor 1-like	AIF1L_MOUSE		-4.38494e-05
Q9ER64	Osbpl5	Oxysterol-binding protein-related protein 5	OSBL5_MOUSE		-0.0159527
Q9JHQ5	Lztfl1	Leucine zipper transcription factor-like protein 1	LZTL1_MOUSE		-0.0451961
Q9JM62	Reep6	Receptor expression-enhancing protein 6	REEP6_MOUSE		0.0614653
Q9QYG0	Ndrg2	Protein NDRG2	NDRG2_MOUSE		0.00254273
Q9QZ85	Iigp1	Interferon-inducible GTPase 1	IIGP1_MOUSE		0.0560043
Q9R1R2	Trim3	Tripartite motif-containing protein 3	TRIM3_MOUSE		0.21861
Q9Z1R3	Apom	Apolipoprotein M	APOM_MOUSE		0.245275
Q9Z2K1	Krt16	Keratin, type I cytoskeletal 16	K1C16_MOUSE		0.00788126
Q9Z2Q5	Mrpl40	39S ribosomal protein L40, mitochondrial	RM40_MOUSE		-0.22665
